# Supplementary material for: Acid–base thermochemistry of gaseous oxygen and sulfur substituted amino acids (Ser, Thr, Cys, Met)
Source: Royal Society of Chemistry journal article supplement (doi:10.1039/c1cp22206f), 2011-01-01
Supplement: c1cp22206f.pdf [file c1cp22206f.pdf]

## ***Acid-base thermochemistry of gaseous oxygen and sulfur substituted amino acids (Ser, Thr, Cys, Met)***

**Vanessa Riffet, Gilles Frison and Guy Bouchoux**

*Laboratoire des Mécanismes Réactionnels, Ecole Polytechnique, 91128 Palaiseau cedex, France.*

### **Electronic Supplementary Information**

Figure S1. Optimized B3LYP/6-31+G(d,p) geometries of the first twenty nine conformers of neutral L-serine (into brackets, relative  $H^{\circ}_{298}$  and  $G^{\circ}_{298}$  in  $\text{kJ mol}^{-1}$  calculated).

Figure S2. Optimized B3LYP/6-31+G(d,p) geometries of the first eleven conformers of deprotonated L-serine (into brackets, relative  $H^{\circ}_{298}$  and  $G^{\circ}_{298}$  in  $\text{kJ mol}^{-1}$  calculated).

Figure S3. Optimized B3LYP/6-31+G(d,p) geometries of the first thirteen conformers of protonated L-serine (into brackets, relative  $H^{\circ}_{298}$  and  $G^{\circ}_{298}$  in  $\text{kJ mol}^{-1}$  calculated).

Figure S4. Relative  $H^{\circ}_{298}$  and  $G^{\circ}_{298}$  ( $\text{kJ mol}^{-1}$ ) of the ten most stable conformers of neutral L-threonine.

Figure S5. Relative  $H^{\circ}_{298}$  and  $G^{\circ}_{298}$  ( $\text{kJ mol}^{-1}$ ) of the four most stable conformers of deprotonated L-threonine.

Figure S6. Relative  $H^{\circ}_{298}$  and  $G^{\circ}_{298}$  ( $\text{kJ mol}^{-1}$ ) of the four most stable conformers of protonated L-threonine.

Figure S7. Optimized B3LYP/6-31+G(d,p) geometries of the first twelve conformers of neutral L-threonine (into brackets, relative  $H^{\circ}_{298}$  and  $G^{\circ}_{298}$  in  $\text{kJ mol}^{-1}$  calculated at the G4 level).

Figure S8. Optimized B3LYP/6-31+G(d,p) geometries of the first four conformers of deprotonated L-threonine (into brackets, relative  $H^{\circ}_{298}$  and  $G^{\circ}_{298}$  in  $\text{kJ mol}^{-1}$  calculated).

Figure S9. Optimized B3LYP/6-31+G(d,p) geometries of the first four conformers of protonated L-threonine (into brackets, relative  $H^{\circ}_{298}$  and  $G^{\circ}_{298}$  in  $\text{kJ mol}^{-1}$  calculated).

Figure S10. Relative  $H^{\circ}_{298}$  and  $G^{\circ}_{298}$  ( $\text{kJ mol}^{-1}$ ) of the eight most stable conformers of neutral L-cysteine.

Figure S11. Relative  $H^{\circ}_{298}$  and  $G^{\circ}_{298}$  ( $\text{kJ mol}^{-1}$ ) of the five most stable conformers of deprotonated L-cysteine.

Figure S12. Relative  $H^{\circ}_{298}$  and  $G^{\circ}_{298}$  ( $\text{kJ mol}^{-1}$ ) of the six most stable conformers of protonated L-cysteine.

Figure S13. Optimized B3LYP/6-31+G(d,p) geometries of the first thirteen conformers of neutral L-cysteine (into brackets, relative  $H^{\circ}_{298}$  and  $G^{\circ}_{298}$  in  $\text{kJ mol}^{-1}$  calculated).

Figure S14. Optimized B3LYP/6-31+G(d,p) geometries of the first eight conformers of deprotonated L-cysteine (into brackets, relative  $H^{\circ}_{298}$  and  $G^{\circ}_{298}$  in  $\text{kJ mol}^{-1}$  calculated).

Figure S15. Optimized B3LYP/6-31+G(d,p) geometries of the first six conformers of protonated L-cysteine (into brackets, relative  $H^{\circ}_{298}$  and  $G^{\circ}_{298}$  in  $\text{kJ mol}^{-1}$  calculated).

Figure S16. Relative  $H^{\circ}_{298}$  and  $G^{\circ}_{298}$  ( $\text{kJ mol}^{-1}$ ) of the most stable conformers of neutral L-methionine.

Figure S17. Relative  $H^{\circ}_{298}$  and  $G^{\circ}_{298}$  ( $\text{kJ mol}^{-1}$ ) of the nine most stable conformers of deprotonated L-methionine.

Figure S18. Relative  $H^{\circ}_{298}$  and  $G^{\circ}_{298}$  ( $\text{kJ mol}^{-1}$ ) of the six most stable conformers of protonated L-methionine.

Figure S19. Optimized B3LYP/6-31+G(d,p) geometries of the first thirty two conformers of neutral L-methionine (into brackets, relative  $H^{\circ}_{298}$  and  $G^{\circ}_{298}$  in  $\text{kJ mol}^{-1}$  calculated).

Figure S20. Optimized B3LYP/6-31+G(d,p) geometries of the first twenty four conformers of deprotonated L-methionine (into brackets, relative  $H^{\circ}_{298}$  and  $G^{\circ}_{298}$  in  $\text{kJ mol}^{-1}$  calculated).

Figure S21. Optimized B3LYP/6-31+G(d,p) geometries of the first six conformers of protonated L-methionine (into brackets, relative  $H^{\circ}_{298}$  and  $G^{\circ}_{298}$  in  $\text{kJ mol}^{-1}$  calculated).

Table T1. Relative energies calculated with Composite methods and DFT for different forms of L-Serine.

Table T2. Relative energies calculated with Composite methods and DFT for different forms of L-threonine.

Table T3. Relative energies calculated with Composite methods and DFT for different forms of L-cysteine.

Table T4. Relative energies calculated with Composite methods and DFT for different forms of L-methionine.

Table T5. Signed deviation (method-G4) on the computed GB and PA of the studied amino acids.

Table T6. Signed deviation (method-G4) on the computed deprotonation thermochemistry of the studied  $\alpha$ -aminoacids.

Table T7. Signed deviation (method-experiment) on the computed protonation thermochemistry of the studied amino acids.

Table T8. Signed deviation (method-experiment) on the computed deprotonation thermochemistry of the studied  $\alpha$ -aminoacids.

Table T9. Computed thermochemical data of reference compounds ammonia and benzoic acid.

Table T10. Correspondence between conformers name in excels tales and charts.

## L-Serine

Figure S1. Optimized B3LYP/6-31+G(d,p) geometries of the first twenty nine conformers of neutral L-serine (into brackets, relative  $H^{\circ}_{298}$  and  $G^{\circ}_{298}$  in  $\text{kJ mol}^{-1}$  calculated).

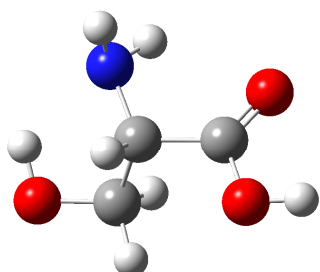

SER1 [0.0; 0.0]

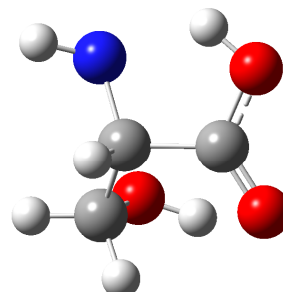

SER2 [0.2; 1.7]

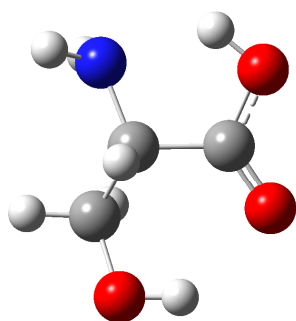

SER3 [1.3; 4.7]

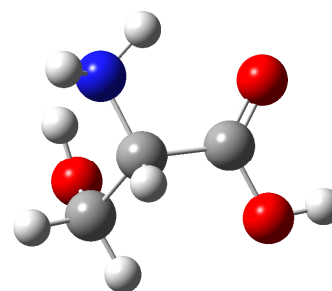

SER4 [3.6; 4.8]

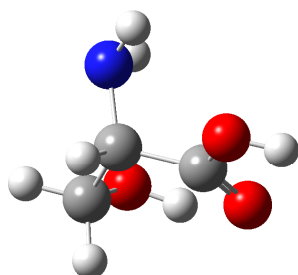

SER5 [6.4; 7.1]

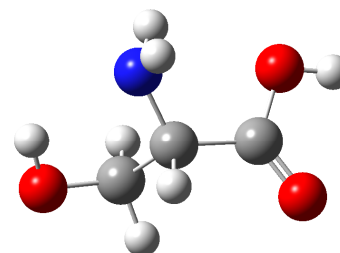

SER6 [6.6; 5.5]

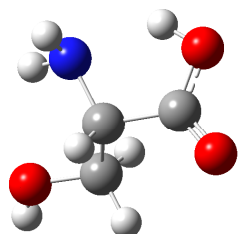

SER7 [6.7; 7.7]

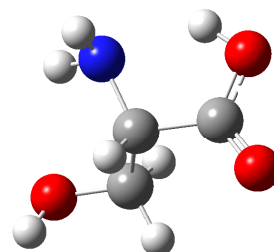

SER8 [6.9; 8.3]

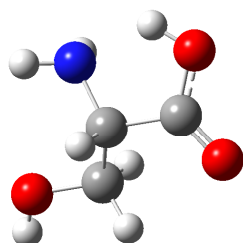

SER9 [7.2; 7.7]

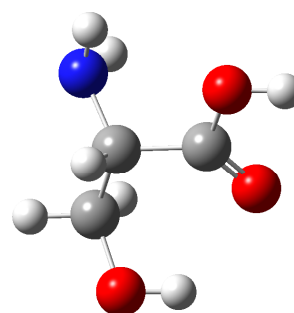

SER10 [8.8; 8.5]

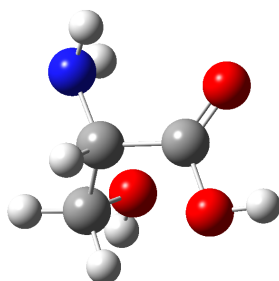

SER11 [9.9; 8.9]

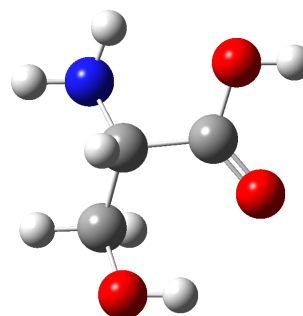

SER12A [10.1; 11.1]

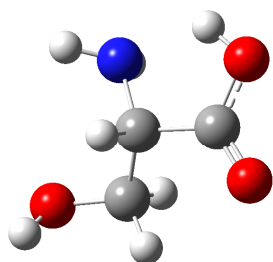

SER12B [10.1; 8.8]

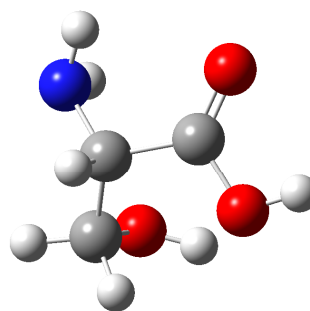

SER13 [10.5; 8.9]

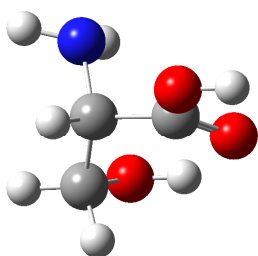

SER14 [11.2; 12.0]

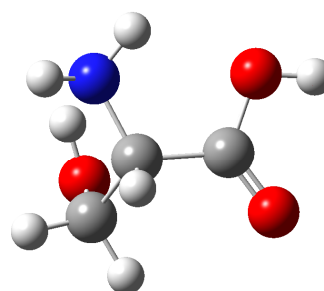

SER15 [11.3; 11.6]

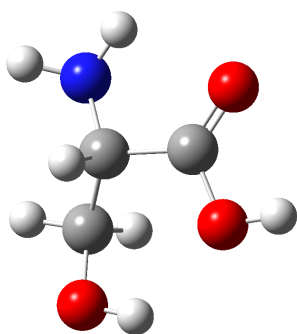

SER16A [11.5; 12.2]

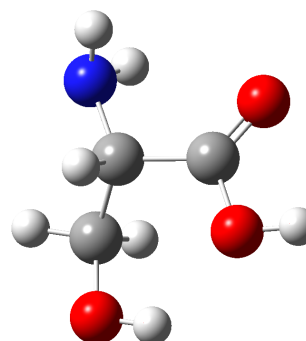

SER16B [11.5; 10.7]

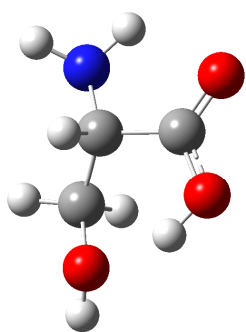

SER17 [12.6; 14.8]

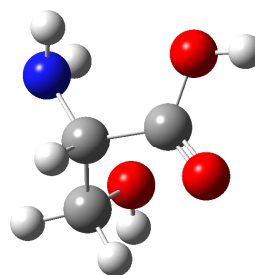

SER18 [13.5; 12.1]

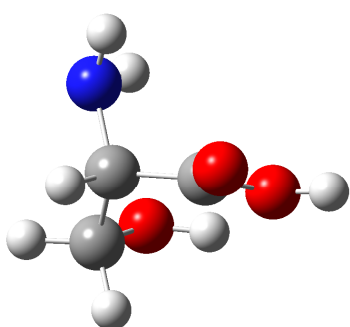

SER19 [13.7; 13.1]

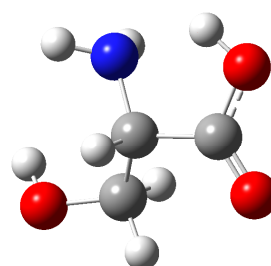

SER20 [13.8; 14.3]

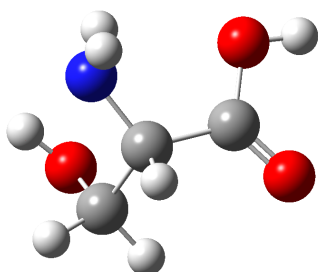

SER21 [13.9; 12.0]

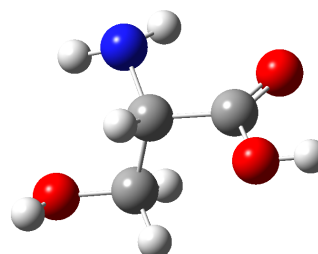

SER22 [14.0; 13.3]

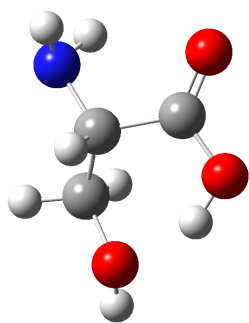

SER23 [14.1; 13.4]

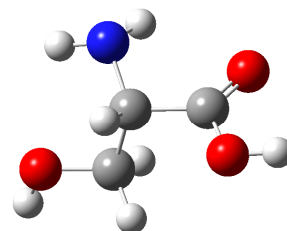

SER24A [14.4; 12.6]

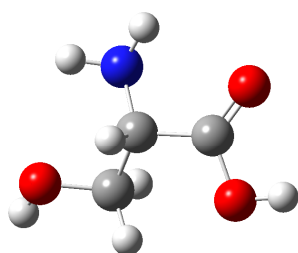

SER24B [14.4; 13.4]

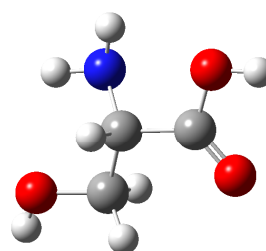

SER25 [14.5; 13.5]

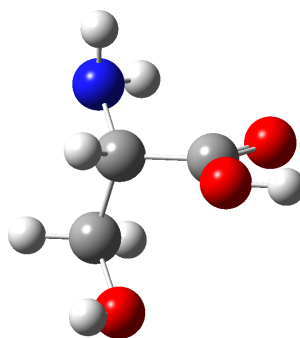

SER26 [14.9; 13.5]

Figure S2. Optimized B3LYP/6-31+G(d,p) geometries of the first eleven conformers of deprotonated L-serine (into brackets, relative  $H^{\circ}_{298}$  and  $G^{\circ}_{298}$  in  $\text{kJ mol}^{-1}$  calculated).

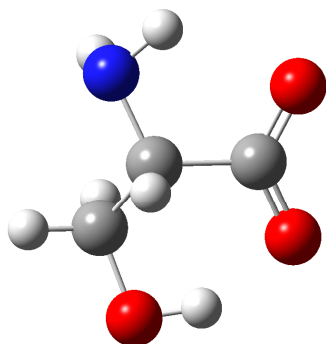

SER-H1 [0.0; 0.0]

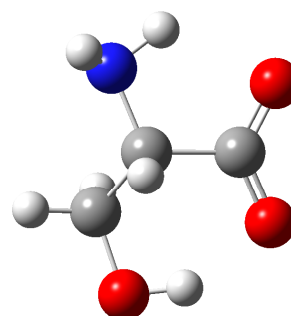

SER-H2 [0.1; 0.4]

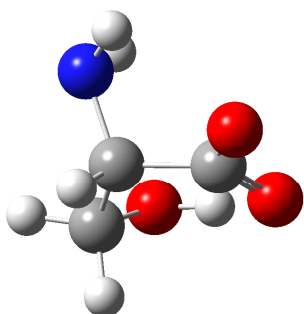

SER-H4 [8.5; 6.4]

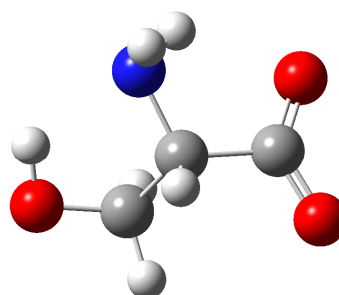

SER-H5 [14.2; 12.7]

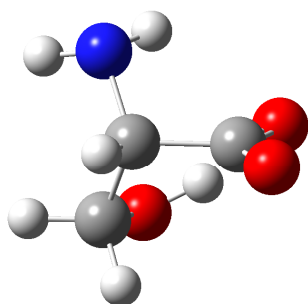

SER-H6 [16.9; 16.8]

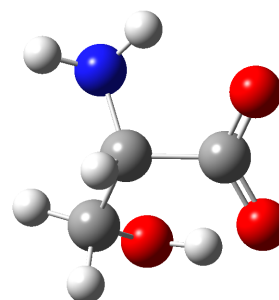

SER-H7 [21.8; 21.3]



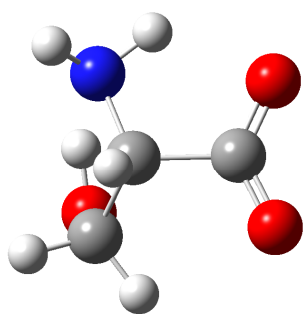

SER-H8 [23.5; 23.2]

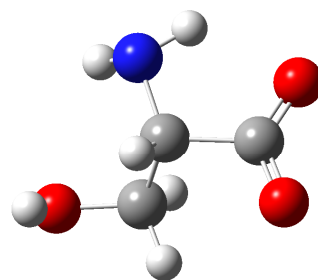

SER-H9 [32.8; 30.0]

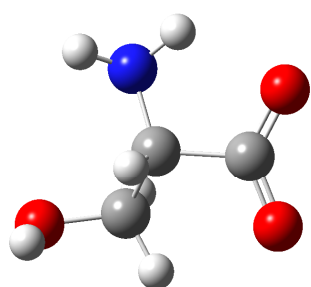

SER-H10 [38.6; 34.9]

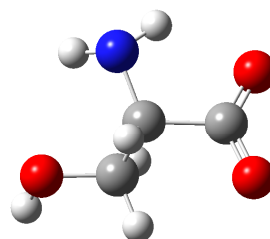

SER-H11 [42.8; 39.5]

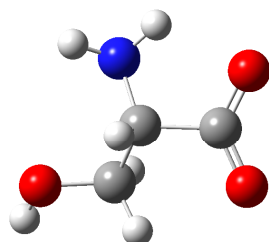

SER-H12 [42.9; 38.8]

Figure S3. Optimized B3LYP/6-31+G(d,p) geometries of the first thirteen conformers of protonated L-serine (into brackets, relative  $H^{\circ}_{298}$  and  $G^{\circ}_{298}$  in  $\text{kJ mol}^{-1}$  calculated).

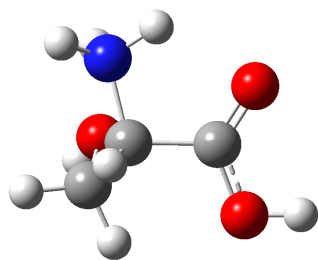

SERH+1 [0.0; 0.0]

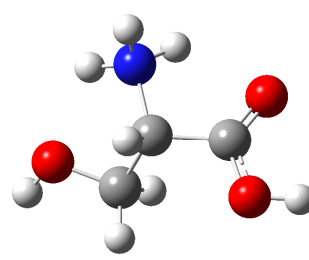

SERH+2 [2.0; 0.6]

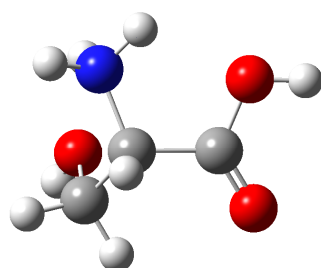

SERH+3 [14.3; 12.7]

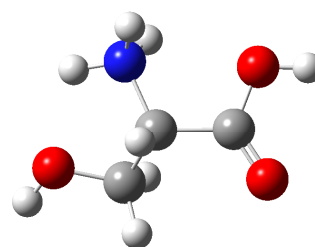

SERH+4 [16.4; 12.5]

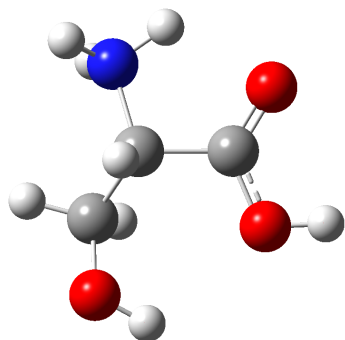

SERH+5 [37.5; 35.2]

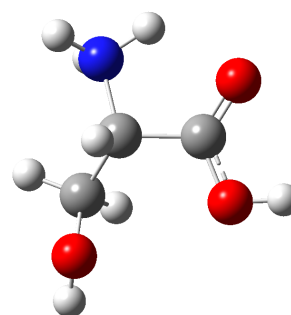

SERH+6 [39.5; 34.5]

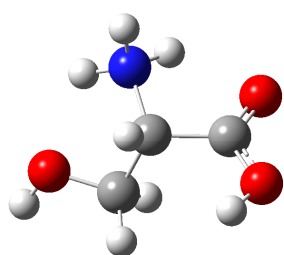

SERH+7 [40.0; 38.7]

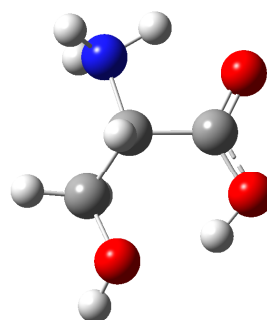

SERH+8 [40.4; 41.3]

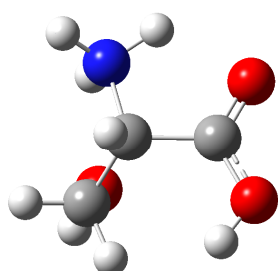

SERH+9 [41.4; 40.7]

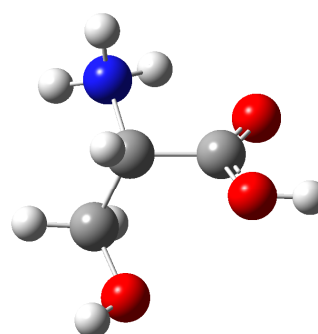

SERH+10 [42.2; 38.4]

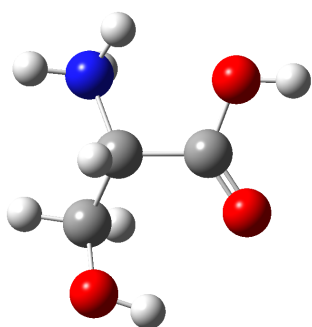

SERH+11 [50.4; 47.7]

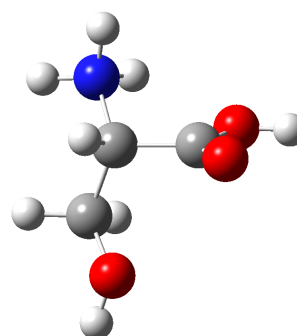

SERH+12 [59.1; 54.5]

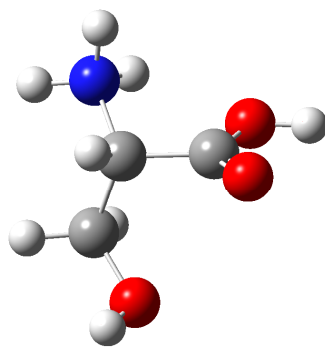

SERH+13 [60.6; 56.2]

Table T1. Relative energies calculated with Composite methods and DFT for different forms of L-Serine.  
**B97D/6-31+G(d,p)**

| Files         | H(0K/hartree) | H(298/hartree) | G(298/hartree) | delta H | delta G | S     | xibrut | xinorm      | Smix         | Hi                 | Si                | Gi                 |
|---------------|---------------|----------------|----------------|---------|---------|-------|--------|-------------|--------------|--------------------|-------------------|--------------------|
| <b>SER1</b>   | -398,634941   | -398,626245    | -398,667265    | 1,6     | 0,0     | 361,4 | 1,00   | 0,34        | 3,05         | -136,600841        | 123,84512         | -136,614898        |
| <b>SER2</b>   | -398,63529    | -398,626845    | -398,667206    | 0,0     | 0,2     | 355,6 | 0,94   | 0,32        | 3,03         | -128,393891        | 114,534281        | -128,406891        |
| <b>SER3</b>   | -398,634458   | -398,626102    | -398,666087    | 2,0     | 3,1     | 352,3 | 0,29   | 0,10        | 1,91         | -39,6435058        | 35,0347627        | -39,6474823        |
| <b>SER4</b>   | -398,632886   | -398,624161    | -398,665121    | 7,0     | 5,6     | 360,9 | 0,11   | 0,04        | 1,00         | -14,3741158        | 13,0128741        | -14,3755928        |
| <b>SER5</b>   | -398,632776   | -398,624227    | -398,664883    | 6,9     | 6,3     | 358,2 | 0,08   | 0,03        | 0,83         | -11,1951611        | 10,0597472        | -11,1963029        |
| <b>SER6</b>   | -398,632599   | -398,623836    | -398,665632    | 7,9     | 4,3     | 368,2 | 0,18   | 0,06        | 1,43         | -24,5836223        | 22,7097885        | -24,5861999        |
| <b>SER7</b>   | -398,632414   | -398,623697    | -398,664523    | 8,3     | 7,2     | 359,7 | 0,06   | 0,02        | 0,63         | -7,67070336        | 6,92157079        | -7,67148897        |
| <b>SER8</b>   | -398,632871   | -398,624264    | -398,664829    | 6,8     | 6,4     | 357,4 | 0,08   | 0,03        | 0,80         | -10,5779425        | 9,48385074        | -10,5790189        |
| <b>SER9</b>   | -398,632201   | -398,623438    | -398,664405    | 8,9     | 7,5     | 360,9 | 0,05   | 0,02        | 0,58         | -6,77665803        | 6,13596198        | -6,77735447        |
| <b>SER10</b>  | -398,631659   | -398,62295     | -398,663985    | 10,2    | 8,6     | 361,5 | 0,03   | 0,01        | 0,41         | -4,35968078        | 3,95405393        | -4,36012958        |
| <b>SER11</b>  | -398,63086    | -398,62191     | -398,663291    | 13,0    | 10,4    | 364,6 | 0,02   | 0,01        | 0,23         | -2,10340494        | 1,92379355        | -2,10362329        |
| <b>SER12A</b> | -398,630216   | -398,62155     | -398,662472    | 13,9    | 12,6    | 360,5 | 0,01   | 0,00        | 0,11         | -0,88997912        | 0,8049551         | -0,89007049        |
| <b>SER12B</b> | -398,631586   | -398,622705    | -398,664191    | 10,9    | 8,1     | 365,5 | 0,04   | 0,01        | 0,49         | -5,41265335        | 4,96301404        | -5,41321666        |
| <b>SER13</b>  | -398,631345   | -398,622542    | -398,664296    | 11,3    | 7,8     | 367,9 | 0,04   | 0,02        | 0,53         | -6,04366138        | 5,57740413        | -6,04429442        |
|               |               |                |                |         |         |       |        | <b>1,00</b> | <b>15,03</b> | <b>-398,625821</b> | <b>358,961178</b> | <b>-398,666564</b> |
| <b>SERH+1</b> | -398,983478   | -398,974517    | -399,015806    | 0,0     | 0,0     | 363,8 | 1,00   | 0,53        | 2,81         | -209,605865        | 191,112193        | -209,627557        |
| <b>SERH+2</b> | -398,98313    | -398,974095    | -399,015686    | 1,1     | 0,3     | 366,4 | 0,88   | 0,46        | 2,96         | -184,787012        | 169,71564         | -184,806275        |
| <b>SERH+3</b> | -398,978738   | -398,96963     | -399,011499    | 12,8    | 11,3    | 368,9 | 0,01   | 0,01        | 0,24         | -2,2750574         | 2,10349202        | -2,27529616        |
| <b>SERH+4</b> | -398,978511   | -398,96936     | -399,011512    | 13,5    | 11,3    | 371,4 | 0,01   | 0,01        | 0,25         | -2,30632929        | 2,1468204         | -2,30657296        |
|               |               |                |                |         |         |       |        | <b>1,00</b> | <b>6,27</b>  | <b>-398,974264</b> | <b>365,078145</b> | <b>-399,015701</b> |
| <b>SER-H1</b> | -398,107456   | -398,099285    | -398,139105    | 0,0     | 0,0     | 350,8 | 1,00   | 0,63        | 2,41         | -252,061894        | 222,132862        | -252,087107        |
| <b>SER-H2</b> | -398,106618   | -398,098381    | -398,138418    | 2,4     | 1,8     | 352,7 | 0,49   | 0,31        | 3,02         | -122,509061        | 108,551315        | -122,521382        |
| <b>SER-H4</b> | -398,104743   | -398,096656    | -398,136776    | 6,9     | 6,1     | 353,5 | 0,09   | 0,05        | 1,32         | -21,8401991        | 19,3920957        | -21,8424001        |
| <b>SER-H5</b> | -398,102245   | -398,093792    | -398,134338    | 14,4    | 12,5    | 357,2 | 0,01   | 0,00        | 0,19         | -1,6876845         | 1,51443149        | -1,68785639        |
|               |               |                |                |         |         |       |        | <b>1,00</b> | <b>6,94</b>  | <b>-398,098839</b> | <b>351,590704</b> | <b>-398,138746</b> |

**B3LYP/6-31+G(d,p)**

| Files         | H(0K/hartree) | H(298/hartree) | G(298/hartree) | delta H | delta G | S     | xibrut | xinorm      | Smix         | Hi                 | Si                | Gi                 |
|---------------|---------------|----------------|----------------|---------|---------|-------|--------|-------------|--------------|--------------------|-------------------|--------------------|
| <b>SER1</b>   | -398,882493   | -398,87387     | -398,914777    | 0,0     | 0,0     | 360,4 | 1,00   | 0,44        | 3,00         | -177,108884        | 160,0288          | -177,127048        |
| <b>SER2</b>   | -398,882171   | -398,873792    | -398,914149    | 0,2     | 1,6     | 355,6 | 0,52   | 0,23        | 2,81         | -91,5823815        | 81,6377571        | -91,5916476        |
| <b>SER3</b>   | -398,881552   | -398,873385    | -398,912996    | 1,3     | 4,7     | 349,0 | 0,15   | 0,07        | 1,53         | -27,2855509        | 23,8731229        | -27,2882606        |
| <b>SER4</b>   | -398,881001   | -398,87249     | -398,912963    | 3,6     | 4,8     | 356,6 | 0,15   | 0,07        | 1,49         | -26,3560657        | 23,561756         | -26,3587401        |
| <b>SER5</b>   | -398,879915   | -398,871417    | -398,912083    | 6,4     | 7,1     | 358,3 | 0,06   | 0,03        | 0,79         | -10,4595952        | 9,39526806        | -10,4606616        |
| <b>SER6</b>   | -398,879983   | -398,871352    | -398,912684    | 6,6     | 5,5     | 364,2 | 0,11   | 0,05        | 1,23         | -19,6620385        | 17,9505548        | -19,6640759        |
| <b>SER7</b>   | -398,879878   | -398,871326    | -398,911863    | 6,7     | 7,7     | 357,1 | 0,05   | 0,02        | 0,67         | -8,30182632        | 7,43341175        | -8,30267003        |
| <b>SER8</b>   | -398,879725   | -398,871238    | -398,911625    | 6,9     | 8,3     | 355,8 | 0,04   | 0,02        | 0,56         | -6,46580621        | 5,76802742        | -6,4664609         |
| <b>SER9</b>   | -398,879755   | -398,871138    | -398,911186    | 7,2     | 7,7     | 358,8 | 0,05   | 0,02        | 0,67         | -8,27570785        | 7,44384629        | -8,27655274        |
| <b>SER10</b>  | -398,879135   | -398,870509    | -398,911528    | 8,8     | 8,5     | 361,4 | 0,03   | 0,01        | 0,51         | -5,83956601        | 5,29089901        | -5,84016654        |
| <b>SER11</b>  | -398,878959   | -398,870081    | -398,911381    | 9,9     | 8,9     | 363,9 | 0,03   | 0,01        | 0,46         | -5,00419223        | 4,56507938        | -5,00471038        |
| <b>SER12A</b> | -398,878542   | -398,870008    | -398,910552    | 10,1    | 11,1    | 357,2 | 0,01   | 0,01        | 0,23         | -2,09522307        | 1,87638191        | -2,09543604        |
| <b>SER12B</b> | -398,878814   | -398,870019    | -398,911447    | 10,1    | 8,7     | 365,0 | 0,03   | 0,01        | 0,48         | -5,36335146        | 4,90788739        | -5,36390852        |
| <b>SER13</b>  | -398,878635   | -398,869857    | -398,911394    | 10,5    | 8,9     | 366,0 | 0,03   | 0,01        | 0,46         | -5,07297812        | 4,65438878        | -5,07350641        |
|               |               |                |                |         |         |       |        | <b>1,00</b> | <b>14,89</b> | <b>-398,873167</b> | <b>358,387181</b> | <b>-398,913845</b> |
| <b>SERH+1</b> | -399,227847   | -399,219259    | -399,259671    | 0,0     | 0,0     | 356,0 | 1,00   | 0,55        | 2,72         | -220,876301        | 196,989800        | -220,89866         |
| <b>SERH+2</b> | -399,227282   | -399,218504    | -399,259452    | 2,0     | 0,6     | 360,8 | 0,79   | 0,44        | 3,00         | -175,494399        | 158,591918        | -175,5124          |
| <b>SERH+3</b> | -399,222607   | -399,21382     | -399,254835    | 14,3    | 12,7    | 361,4 | 0,01   | 0,00        | 0,16         | -1,375506          | 1,245075          | -1,37564778        |
| <b>SERH+4</b> | -399,221975   | -399,213006    | -399,2549      | 16,4    | 12,5    | 369,1 | 0,01   | 0,00        | 0,17         | -1,472679          | 1,361604          | -1,4728332         |
|               |               |                |                |         |         |       |        | <b>1,00</b> | <b>6,06</b>  | <b>-399,218885</b> | <b>358,188397</b> | <b>-399,25954</b>  |
| <b>SER-H1</b> | -398,358257   | -398,350253    | -398,389681    | 0,0     | 0,0     | 347,4 | 1,00   | 0,51        | 2,84         | -204,696005        | 178,502694        | -204,716265        |
| <b>SER-H2</b> | -398,358165   | -398,350209    | -398,38954     | 0,1     | 0,4     | 346,5 | 0,86   | 0,44        | 3,00         | -176,522379        | 153,555533        | -176,539808        |
| <b>SER-H4</b> | -398,35504    | -398,347009    | -398,387246    | 8,5     | 6,4     | 354,5 | 0,08   | 0,04        | 1,07         | -15,8676244        | 14,1212032        | -15,8692272        |
| <b>SER-H5</b> | -398,353021   | -398,344826    | -398,384837    | 14,2    | 12,7    | 352,5 | 0,01   | 0,00        | 0,15         | -1,26407869        | 1,11863936        | -1,26420566        |
|               |               |                |                |         |         |       |        | <b>1,00</b> | <b>7,06</b>  | <b>-398,350087</b> | <b>347,29807</b>  | <b>-398,389506</b> |

**M062X/6-31+G(d,p)**

| Files  | H(0K/hartree) | H(298/hartree) | G(298/hartree) | delta H | delta G | S     | xibrut | xinorm      | Smix         | Hi                 | Si                | Gi                 |
|--------|---------------|----------------|----------------|---------|---------|-------|--------|-------------|--------------|--------------------|-------------------|--------------------|
| SER1   | -398,711284   | -398,702784    | -398,743417    | 0,9     | 0,0     | 358,0 | 1,00   | 0,42        | 3,03         | -167,733795        | 150,607276        | -167,75089         |
| SER2   | -398,711315   | -398,703133    | -398,742845    | 0,0     | 1,5     | 349,9 | 0,55   | 0,23        | 2,81         | -91,9885991        | 80,7238515        | -91,9977614        |
| SER3   | -398,710023   | -398,701899    | -398,741392    | 3,2     | 5,3     | 347,9 | 0,12   | 0,05        | 1,25         | -19,9997736        | 17,453907         | -20,0017546        |
| SER4   | -398,710613   | -398,702282    | -398,74231     | 2,2     | 2,9     | 352,7 | 0,31   | 0,13        | 2,22         | -52,4471246        | 46,3908801        | -52,4523901        |
| SER5   | -398,709391   | -398,701118    | -398,741022    | 5,3     | 6,3     | 351,6 | 0,08   | 0,03        | 0,96         | -13,5602808        | 11,9573081        | -13,561638         |
| SER6   | -398,708652   | -398,700148    | -398,74127     | 7,8     | 5,6     | 362,3 | 0,10   | 0,04        | 1,15         | -17,5946022        | 15,9883277        | -17,5964169        |
| SER7   | -398,708122   | -398,699704    | -398,739954    | 9,0     | 9,1     | 354,6 | 0,03   | 0,01        | 0,41         | -4,41729645        | 3,92891177        | -4,41774239        |
| SER8   | -398,707737   | -398,69939     | -398,739487    | 9,8     | 10,3    | 353,3 | 0,02   | 0,01        | 0,28         | -2,70495062        | 2,39674268        | -2,70522266        |
| SER9   | -398,707892   | -398,69944     | -398,739696    | 9,7     | 9,8     | 354,7 | 0,02   | 0,01        | 0,34         | -3,36886396        | 2,99684462        | -3,36920411        |
| SER10  | -398,708304   | -398,699848    | -398,740471    | 8,6     | 7,7     | 357,9 | 0,05   | 0,02        | 0,63         | -7,60253395        | 6,82464475        | -7,60330857        |
| SER11  | -398,708254   | -398,699672    | -398,740258    | 9,1     | 8,3     | 357,6 | 0,04   | 0,02        | 0,53         | -6,07868607        | 5,45174892        | -6,07930485        |
| SER12A | -398,707797   | -398,699461    | -398,739462    | 9,6     | 10,4    | 352,4 | 0,02   | 0,01        | 0,28         | -2,6348568         | 2,32904552        | -2,63512115        |
| SER12B | -398,706822   | -398,69815     | -398,739156    | 13,1    | 11,2    | 361,3 | 0,01   | 0,00        | 0,21         | -1,91068984        | 1,73136701        | -1,91088635        |
| SER13  | -398,708245   | -398,69974     | -398,740345    | 8,9     | 8,1     | 357,7 | 0,04   | 0,02        | 0,57         | -6,6602441         | 5,97612218        | -6,66092241        |
|        |               |                |                |         |         |       |        | <b>1,00</b> | <b>14,66</b> | <b>-398,702297</b> | <b>354,756977</b> | <b>-398,742563</b> |
| SERH+1 | -399,054475   | -399,045999    | -399,086185    | 0,0     | 0,0     | 354,1 | 1,00   | 0,61        | 2,51         | -243,187268        | 215,768684        | -243,211758        |
| SERH+2 | -399,053569   | -399,044866    | -399,085743    | 3,0     | 1,2     | 360,1 | 0,63   | 0,38        | 3,06         | -152,878052        | 137,974296        | -152,893712        |
| SERH+3 | -399,049644   | -399,041062    | -399,081689    | 13,0    | 11,8    | 357,9 | 0,01   | 0,01        | 0,24         | -2,1643503         | 1,94142438        | -2,16457066        |
| SERH+4 | -399,048313   | -399,039566    | -399,08076     | 16,9    | 14,2    | 362,9 | 0,00   | 0,00        | 0,11         | -0,81585444        | 0,74203851        | -0,81593866        |
|        |               |                |                |         |         |       |        | <b>1,00</b> | <b>5,91</b>  | <b>-399,045525</b> | <b>356,426442</b> | <b>-399,08598</b>  |
| SER-H1 | -398,185663   | -398,177689    | -398,217076    | 0,0     | 0,0     | 347,0 | 1,00   | 0,62        | 2,46         | -247,015915        | 215,276525        | -247,040349        |
| SER-H2 | -398,185203   | -398,177317    | -398,216528    | 1,0     | 1,4     | 345,5 | 0,56   | 0,35        | 3,05         | -138,926113        | 120,53441         | -138,939794        |
| SER-H4 | -398,182595   | -398,174697    | -398,214125    | 7,9     | 7,7     | 347,4 | 0,05   | 0,03        | 0,83         | -11,1373581        | 9,7164816         | -11,138461         |
| SER-H5 | -398,1801     | -398,171946    | -398,211919    | 15,1    | 13,5    | 352,2 | 0,00   | 0,00        | 0,14         | -1,09807313        | 0,97123228        | -1,09818337        |
|        |               |                |                |         |         |       |        | <b>1,00</b> | <b>6,48</b>  | <b>-398,17746</b>  | <b>346,498649</b> | <b>-398,216788</b> |

**CBS-QB3**

| Files         | H(0K/hartree) | H(298/hartree) | G(298/hartree) | delta H | delta G | S     | xibrut | xinorm      | Smix         | Hi                 | Si                | Gi                 |
|---------------|---------------|----------------|----------------|---------|---------|-------|--------|-------------|--------------|--------------------|-------------------|--------------------|
| <b>SER1</b>   | -398,403867   | -398,395276    | -398,436035    | 1,6     | 0,0     | 359,1 | 1,00   | 0,31        | 3,02         | -123,228981        | 111,075418        | -123,241588        |
| <b>SER2</b>   | -398,404206   | -398,395899    | -398,436017    | 0,0     | 0,0     | 353,5 | 0,98   | 0,30        | 3,01         | -120,921578        | 107,281288        | -120,933755        |
| <b>SER3</b>   | -398,402747   | -398,394608    | -398,434094    | 3,4     | 5,1     | 347,9 | 0,13   | 0,04        | 1,08         | -16,0483234        | 14,0137742        | -16,049914         |
| <b>SER4</b>   | -398,403356   | -398,394895    | -398,435215    | 2,6     | 2,2     | 355,2 | 0,42   | 0,13        | 2,21         | -52,0851199        | 46,4425637        | -52,0903912        |
| <b>SER5</b>   | -398,402213   | -398,393787    | -398,434138    | 5,5     | 5,0     | 355,5 | 0,14   | 0,04        | 1,11         | -16,8072631        | 14,9980398        | -16,8089654        |
| <b>SER6</b>   | -398,401161   | -398,392539    | -398,433948    | 8,8     | 5,5     | 364,8 | 0,11   | 0,03        | 0,97         | -13,7669389        | 12,6071433        | -13,7683699        |
| <b>SER7</b>   | -398,401462   | -398,392976    | -398,433303    | 7,7     | 7,2     | 355,3 | 0,06   | 0,02        | 0,59         | -6,9928717         | 6,23642783        | -6,99358502        |
| <b>SER8</b>   | -398,401143   | -398,392747    | -398,432891    | 8,3     | 8,3     | 353,7 | 0,04   | 0,01        | 0,42         | -4,53674189        | 4,02762521        | -4,53719904        |
| <b>SER9</b>   | -398,401037   | -398,392415    | -398,433056    | 9,1     | 7,8     | 358,1 | 0,04   | 0,01        | 0,48         | -5,39510077        | 4,84896047        | -5,39565113        |
| <b>SER10</b>  | -398,400943   | -398,392331    | -398,433426    | 9,4     | 6,8     | 362,1 | 0,06   | 0,02        | 0,65         | -7,95710361        | 7,23150659        | -7,9579244         |
| <b>SER11</b>  | -398,401664   | -398,392789    | -398,434036    | 8,2     | 5,2     | 363,4 | 0,12   | 0,04        | 1,03         | -15,0999014        | 13,7737047        | -15,1014648        |
| <b>SER12A</b> | -398,400899   | -398,392359    | -398,432877    | 9,3     | 8,3     | 357,0 | 0,04   | 0,01        | 0,42         | -4,47052269        | 4,0058166         | -4,47097736        |
| <b>SER12B</b> | -398,399789   | -398,391113    | -398,431984    | 12,6    | 10,6    | 360,1 | 0,01   | 0,00        | 0,20         | -1,75010119        | 1,58184724        | -1,75028073        |
| <b>SER13</b>  | -398,401177   | -398,392522    | -398,433578    | 8,9     | 6,5     | 361,7 | 0,08   | 0,02        | 0,73         | -9,33430147        | 8,47506501        | -9,3352634         |
|               |               |                |                |         |         |       |        | <b>1,00</b> | <b>15,92</b> | <b>-398,394854</b> | <b>356,599181</b> | <b>-398,435329</b> |
| <b>SERH+1</b> | -398,748799   | -398,740259    | -398,780525    | 0,0     | 0,0     | 354,8 | 1,00   | 0,70        | 2,06         | -280,426277        | 249,495586        | -280,454595        |
| <b>SERH+2</b> | -398,747631   | -398,738905    | -398,779689    | 3,6     | 2,2     | 359,3 | 0,42   | 0,29        | 2,99         | -116,55232         | 105,031093        | -116,564241        |
| <b>SERH+3</b> | -398,743165   | -398,73445     | -398,775228    | 15,3    | 13,9    | 359,3 | 0,00   | 0,00        | 0,13         | -1,07614681        | 0,96963759        | -1,07625687        |
| <b>SERH+4</b> | -398,741941   | -398,733012    | -398,774798    | 19,0    | 15,0    | 368,2 | 0,00   | 0,00        | 0,09         | -0,68509161        | 0,63254731        | -0,68516341        |
|               |               |                |                |         |         |       |        | <b>1,00</b> | <b>5,27</b>  | <b>-398,739835</b> | <b>356,128865</b> | <b>-398,780256</b> |
| <b>SER-H1</b> | -397,87789    | -397,869959    | -397,909124    | 0,3     | 0,6     | 345,1 | 0,78   | 0,42        | 3,03         | -168,408712        | 146,055291        | -168,425289        |
| <b>SER-H2</b> | -397,878005   | -397,870055    | -397,909365    | 0,0     | 0,0     | 346,3 | 1,00   | 0,55        | 2,75         | -216,912115        | 188,817115        | -216,933546        |
| <b>SER-H4</b> | -397,875082   | -397,867172    | -397,906607    | 7,6     | 7,2     | 347,4 | 0,06   | 0,03        | 0,88         | -11,9775424        | 10,4594106        | -11,9787295        |
| <b>SER-H5</b> | -397,87207    | -397,863962    | -397,90371     | 16,0    | 14,8    | 350,2 | 0,00   | 0,00        | 0,08         | -0,57154958        | 0,50307223        | -0,57160668        |
|               |               |                |                |         |         |       |        | <b>1,00</b> | <b>6,73</b>  | <b>-397,869919</b> | <b>345,834889</b> | <b>-397,909172</b> |



**G3B3**

| Files         | H(0K/hartree) | H(298/hartree) | G(298/hartree) | delta H | delta G | S     | xibrut | xinorm      | Smix         | Hi                 | Si                | Gi                 |
|---------------|---------------|----------------|----------------|---------|---------|-------|--------|-------------|--------------|--------------------|-------------------|--------------------|
| <b>SER1</b>   | -398,718563   | -398,709852    | -398,750865    | 1,5     | 0,0     | 361,3 | 1,00   | 0,33        | 3,04         | -131,279303        | 118,975241        | -131,292807        |
| <b>SER2</b>   | -398,71881    | -398,710429    | -398,75059     | 0,0     | 0,7     | 353,8 | 0,75   | 0,25        | 2,87         | -98,3491188        | 87,2796817        | -98,3590252        |
| <b>SER3</b>   | -398,717392   | -398,709141    | -398,748821    | 3,4     | 5,4     | 349,6 | 0,12   | 0,04        | 1,04         | -15,3438778        | 13,4538432        | -15,3454048        |
| <b>SER4</b>   | -398,718089   | -398,709495    | -398,750083    | 2,5     | 2,1     | 357,6 | 0,44   | 0,14        | 2,33         | -57,74691          | 51,7923459        | -57,7527886        |
| <b>SER5</b>   | -398,716763   | -398,708239    | -398,748756    | 5,7     | 5,5     | 357,0 | 0,11   | 0,04        | 0,99         | -14,3313765        | 12,8311545        | -14,3328328        |
| <b>SER6</b>   | -398,715922   | -398,707172    | -398,748816    | 8,6     | 5,4     | 366,9 | 0,12   | 0,04        | 1,04         | -15,2634429        | 14,0458056        | -15,2650371        |
| <b>SER7</b>   | -398,716424   | -398,707789    | -398,748428    | 6,9     | 6,4     | 358,0 | 0,08   | 0,03        | 0,78         | -10,1551865        | 9,1195195         | -10,1562216        |
| <b>SER8</b>   | -398,716087   | -398,707551    | -398,747981    | 7,6     | 7,6     | 356,2 | 0,05   | 0,02        | 0,55         | -6,35056996        | 5,67358733        | -6,35121392        |
| <b>SER9</b>   | -398,715932   | -398,707181    | -398,748083    | 8,5     | 7,3     | 360,4 | 0,05   | 0,02        | 0,59         | -7,06861129        | 6,38881549        | -7,06933644        |
| <b>SER10</b>  | -398,715362   | -398,706638    | -398,748148    | 10,0    | 7,1     | 365,7 | 0,06   | 0,02        | 0,63         | -7,56797612        | 6,94184286        | -7,56876403        |
| <b>SER11</b>  | -398,716491   | -398,707467    | -398,749022    | 7,8     | 4,8     | 366,1 | 0,14   | 0,05        | 1,20         | -18,9499739        | 17,4009634        | -18,951949         |
| <b>SER12A</b> | -398,715474   | -398,706836    | -398,74755     | 9,4     | 8,7     | 358,7 | 0,03   | 0,01        | 0,39         | -4,03863423        | 3,63345989        | -4,03904664        |
| <b>SER12B</b> | -398,714628   | -398,70584     | -398,746897    | 12,0    | 10,4    | 361,7 | 0,02   | 0,01        | 0,22         | -2,03424242        | 1,84558087        | -2,0344519         |
| <b>SER13</b>  | -398,715891   | -398,707105    | -398,748435    | 8,7     | 6,4     | 364,1 | 0,08   | 0,03        | 0,78         | -10,2300989        | 9,34301446        | -10,2311594        |
|               |               |                |                |         |         |       |        | <b>1,00</b> | <b>16,46</b> | <b>-398,709322</b> | <b>358,724855</b> | <b>-398,750038</b> |
| <b>SERH+1</b> | -399,064254   | -399,055587    | -399,096085    | 0,0     | 0,0     | 356,8 | 1,00   | 0,68        | 2,17         | -271,906434        | 243,117053        | -271,934028        |
| <b>SERH+2</b> | -399,063169   | -399,05432     | -399,095343    | 3,3     | 1,9     | 361,4 | 0,46   | 0,31        | 3,02         | -124,736865        | 112,975945        | -124,749688        |
| <b>SERH+3</b> | -399,058865   | -399,049983    | -399,091114    | 14,7    | 13,1    | 362,4 | 0,01   | 0,00        | 0,17         | -1,46946703        | 1,33443547        | -1,46961849        |
| <b>SERH+4</b> | -399,057707   | -399,048629    | -399,090691    | 18,3    | 14,2    | 370,6 | 0,00   | 0,00        | 0,12         | -0,94238798        | 0,8751643         | -0,94248731        |
|               |               |                |                |         |         |       |        | <b>1,00</b> | <b>5,49</b>  | <b>-399,055154</b> | <b>358,302598</b> | <b>-399,095822</b> |
| <b>SER-H1</b> | -398,191174   | -398,183134    | -398,222517    | 0,1     | 0,5     | 347,0 | 0,81   | 0,43        | 3,01         | -172,891375        | 150,65898         | -172,908475        |
| <b>SER-H2</b> | -398,191235   | -398,183183    | -398,222712    | 0,0     | 0,0     | 348,3 | 1,00   | 0,53        | 2,79         | -212,183747        | 185,584109        | -212,204811        |
| <b>SER-H4</b> | -398,188393   | -398,180397    | -398,220006    | 7,3     | 7,1     | 349,0 | 0,06   | 0,03        | 0,90         | -12,3740858        | 10,8448334        | -12,3753167        |
| <b>SER-H5</b> | -398,185531   | -398,177304    | -398,217316    | 15,4    | 14,2    | 352,5 | 0,00   | 0,00        | 0,10         | -0,73385682        | 0,64971195        | -0,73393057        |
|               |               |                |                |         |         |       |        | <b>1,00</b> | <b>6,79</b>  | <b>-398,183064</b> | <b>347,737634</b> | <b>-398,222533</b> |

**G4MP2**

| Files         | H(0K/hartree) | H(298/hartree) | G(298/hartree) | delta H | delta G | S     | xibrut | xinorm      | Smix         | Hi                 | Si                | Gi                  |
|---------------|---------------|----------------|----------------|---------|---------|-------|--------|-------------|--------------|--------------------|-------------------|---------------------|
| <b>SER1</b>   | -398,497522   | -398,488878    | -398,529749    | 0,9     | 0,0     | 360,1 | 1,00   | 0,36        | 3,06         | -145,158115        | 131,170489        | -145,1730035        |
| <b>SER2</b>   | -398,497544   | -398,489215    | -398,529329    | 0,0     | 1,1     | 353,4 | 0,64   | 0,23        | 2,83         | -93,3859069        | 82,8240566        | -93,39530766        |
| <b>SER3</b>   | -398,496029   | -398,487832    | -398,52744     | 3,6     | 6,1     | 349,0 | 0,09   | 0,03        | 0,92         | -12,8444161        | 11,2480691        | -12,8456928         |
| <b>SER4</b>   | -398,496862   | -398,488363    | -398,528765    | 2,2     | 2,6     | 356,0 | 0,36   | 0,13        | 2,20         | -51,6466589        | 46,1344355        | -51,65189528        |
| <b>SER5</b>   | -398,495404   | -398,486974    | -398,527292    | 5,9     | 6,5     | 355,2 | 0,08   | 0,03        | 0,82         | -10,9954046        | 9,80148374        | -10,99651708        |
| <b>SER6</b>   | -398,494909   | -398,486239    | -398,527748    | 7,8     | 5,3     | 365,7 | 0,12   | 0,04        | 1,15         | -17,7496674        | 16,2897688        | -17,7515163         |
| <b>SER7</b>   | -398,495297   | -398,486725    | -398,527249    | 6,5     | 6,6     | 357,0 | 0,07   | 0,03        | 0,80         | -10,5099055        | 9,41657607        | -10,51097433        |
| <b>SER8</b>   | -398,494952   | -398,486484    | -398,526786    | 7,2     | 7,8     | 355,1 | 0,04   | 0,02        | 0,56         | -6,46287969        | 5,75883762        | -6,463533333        |
| <b>SER9</b>   | -398,494862   | -398,486151    | -398,52701     | 8,0     | 7,2     | 360,0 | 0,06   | 0,02        | 0,66         | -8,17694783        | 7,38688753        | -8,177786262        |
| <b>SER10</b>  | -398,494181   | -398,48553     | -398,526986    | 9,7     | 7,3     | 365,2 | 0,05   | 0,02        | 0,65         | -7,97341272        | 7,30827437        | -7,974242228        |
| <b>SER11</b>  | -398,495349   | -398,486424    | -398,527786    | 7,3     | 5,2     | 364,4 | 0,13   | 0,05        | 1,18         | -18,4723467        | 16,892963         | -18,47426409        |
| <b>SER12A</b> | -398,494163   | -398,485594    | -398,526235    | 9,5     | 9,2     | 358,1 | 0,02   | 0,01        | 0,36         | -3,62339908        | 3,25584475        | -3,623768626        |
| <b>SER12B</b> | -398,493627   | -398,48488     | -398,5259      | 11,4    | 10,1    | 361,4 | 0,02   | 0,01        | 0,27         | -2,54872636        | 2,31154726        | -2,548988721        |
| <b>SER13</b>  | -398,494656   | -398,485967    | -398,527095    | 8,5     | 7,0     | 362,4 | 0,06   | 0,02        | 0,71         | -8,94044616        | 8,12979341        | -8,941368908        |
|               |               |                |                |         |         |       |        | <b>1,00</b> | <b>16,17</b> | <b>-398,488233</b> | <b>357,929027</b> | <b>-398,5288591</b> |
| <b>SERH+1</b> | -398,843199   | -398,834646    | -398,874939    | 0,0     | 0,0     | 355,0 | 1,00   | 0,68        | 2,20         | -269,846766        | 240,187113        | -269,8740278        |
| <b>SERH+2</b> | -398,842196   | -398,833481    | -398,87422     | 3,1     | 1,9     | 358,9 | 0,47   | 0,32        | 3,03         | -126,818578        | 114,129363        | -126,8315317        |
| <b>SERH+3</b> | -398,837736   | -398,828969    | -398,869902    | 14,9    | 13,2    | 360,6 | 0,01   | 0,00        | 0,16         | -1,36067735        | 1,23037584        | -1,360817005        |
| <b>SERH+4</b> | -398,836589   | -398,827646    | -398,869406    | 18,4    | 14,5    | 367,9 | 0,00   | 0,00        | 0,10         | -0,80822088        | 0,74559169        | -0,80830551         |
|               |               |                |                |         |         |       |        | <b>1,00</b> | <b>5,49</b>  | <b>-398,834242</b> | <b>356,292443</b> | <b>-398,874682</b>  |
| <b>SER-H1</b> | -397,968858   | -397,960944    | -398,000084    | 0,2     | 0,3     | 344,8 | 0,89   | 0,45        | 2,99         | -178,233347        | 154,441883        | -178,2508761        |
| <b>SER-H2</b> | -397,968927   | -397,961007    | -398,000196    | 0,0     | 0,0     | 345,3 | 1,00   | 0,50        | 2,87         | -200,48034         | 173,936693        | -200,500082         |
| <b>SER-H4</b> | -397,966284   | -397,958357    | -397,997895    | 7,0     | 6,0     | 348,3 | 0,09   | 0,04        | 1,16         | -17,8892384        | 15,6590236        | -17,89101577        |
| <b>SER-H5</b> | -397,963712   | -397,955566    | -397,99544     | 14,3    | 12,5    | 351,3 | 0,01   | 0,00        | 0,16         | -1,35791619        | 1,1987371         | -1,358052253        |
|               |               |                |                |         |         |       |        | <b>1,00</b> | <b>7,18</b>  | <b>-397,960841</b> | <b>345,236337</b> | <b>-398,0000262</b> |

G4

| Files  | H(0K/hartree) | H(298/hartree) | G(298/hartree) | delta H | delta G | S     | xibrut | xinorm      | Smix         | Hi                 | Si                | Gi                 |
|--------|---------------|----------------|----------------|---------|---------|-------|--------|-------------|--------------|--------------------|-------------------|--------------------|
| SER1   | -398,784309   | -398,775664    | -398,816538    | 1,2     | 0,0     | 360,1 | 1,00   | 0,35        | 3,05         | -138,177067        | 124,781506        | -138,19123         |
| SER2   | -398,784469   | -398,776137    | -398,81626     | 0,0     | 0,7     | 353,5 | 0,75   | 0,26        | 2,91         | -103,19099         | 91,4748644        | -103,201373        |
| SER3   | -398,78292    | -398,774723    | -398,814334    | 3,7     | 5,8     | 349,0 | 0,10   | 0,03        | 0,96         | -13,6520924        | 11,9476684        | -13,6534485        |
| SER4   | -398,783707   | -398,775207    | -398,815612    | 2,4     | 2,4     | 356,0 | 0,38   | 0,13        | 2,21         | -52,250508         | 46,6437262        | -52,2558022        |
| SER5   | -398,782141   | -398,773712    | -398,814026    | 6,4     | 6,6     | 355,2 | 0,07   | 0,02        | 0,76         | -9,87917162        | 8,79925005        | -9,88017035        |
| SER6   | -398,781748   | -398,773078    | -398,814587    | 8,0     | 5,1     | 365,7 | 0,13   | 0,04        | 1,15         | -17,8069579        | 16,3305921        | -17,8088115        |
| SER7   | -398,782193   | -398,773621    | -398,814145    | 6,6     | 6,3     | 357,0 | 0,08   | 0,03        | 0,83         | -11,1942722        | 10,0225333        | -11,1954098        |
| SER8   | -398,781841   | -398,773373    | -398,813675    | 7,3     | 7,5     | 355,1 | 0,05   | 0,02        | 0,58         | -6,83329928        | 6,08452455        | -6,83398989        |
| SER9   | -398,78169    | -398,772979    | -398,813838    | 8,3     | 7,1     | 360,0 | 0,06   | 0,02        | 0,66         | -8,10911896        | 7,32034317        | -8,10994984        |
| SER10  | -398,780919   | -398,772268    | -398,813725    | 10,2    | 7,4     | 365,3 | 0,05   | 0,02        | 0,60         | -7,20168368        | 6,59633531        | -7,20243238        |
| SER11  | -398,782097   | -398,773172    | -398,814534    | 7,8     | 5,3     | 364,4 | 0,12   | 0,04        | 1,11         | -16,8428951        | 15,3917535        | -16,8446421        |
| SER12A | -398,780896   | -398,772327    | -398,812968    | 10,0    | 9,4     | 358,1 | 0,02   | 0,01        | 0,33         | -3,25214114        | 2,92014567        | -3,25247258        |
| SER12B | -398,78041    | -398,771663    | -398,812683    | 11,7    | 10,1    | 361,4 | 0,02   | 0,01        | 0,26         | -2,41091158        | 2,18498474        | -2,41115958        |
| SER13  | -398,781383   | -398,772694    | -398,813822    | 9,0     | 7,1     | 362,4 | 0,06   | 0,02        | 0,65         | -7,97399252        | 7,24575694        | -7,97481493        |
|        |               |                |                |         |         |       |        | <b>1,00</b> | <b>16,07</b> | <b>-398,775102</b> | <b>357,743984</b> | <b>-398,815707</b> |
| SERH+1 | -399,129967   | -399,121415    | -399,161708    | 0,0     | 0,0     | 355,0 | 1,00   | 0,68        | 2,17         | -272,557563        | 242,42565         | -272,585078        |
| SERH+2 | -399,128935   | -399,12022     | -399,16096     | 3,1     | 2,0     | 358,9 | 0,46   | 0,31        | 3,02         | -124,250195        | 111,740377        | -124,262878        |
| SERH+3 | -399,12457    | -399,115802    | -399,156735    | 14,7    | 13,1    | 360,6 | 0,01   | 0,00        | 0,17         | -1,46989529        | 1,32817961        | -1,47004604        |
| SERH+4 | -399,12339    | -399,114446    | -399,156206    | 18,3    | 14,4    | 367,9 | 0,00   | 0,00        | 0,11         | -0,84335438        | 0,77744362        | -0,84344262        |
|        |               |                |                |         |         |       |        | <b>1,00</b> | <b>5,47</b>  | <b>-399,121008</b> | <b>356,27165</b>  | <b>-399,161445</b> |
| SER-H1 | -398,25644    | -398,248526    | -398,287666    | 0,3     | 0,5     | 344,8 | 0,83   | 0,43        | 3,01         | -172,107191        | 149,025785        | -172,124105        |
| SER-H2 | -398,256573   | -398,248653    | -398,287842    | 0,0     | 0,0     | 345,3 | 1,00   | 0,52        | 2,83         | -207,048487        | 179,505469        | -207,068861        |
| SER-H4 | -398,253897   | -398,24597     | -398,285508    | 7,0     | 6,1     | 348,3 | 0,09   | 0,04        | 1,16         | -17,8460013        | 15,6098952        | -17,847773         |
| SER-H5 | -398,251246   | -398,243101    | -398,282974    | 14,6    | 12,8    | 351,3 | 0,01   | 0,00        | 0,15         | -1,24678154        | 1,09980774        | -1,24690637        |
|        |               |                |                |         |         |       |        | <b>1,00</b> | <b>7,15</b>  | <b>-398,248461</b> | <b>345,240957</b> | <b>-398,287646</b> |

## L-Threonine

Figure S4. Relative  $H^{\circ}_{298}$  and  $G^{\circ}_{298}$  ( $\text{kJ mol}^{-1}$ ) of the ten most stable conformers of neutral L-threonine.

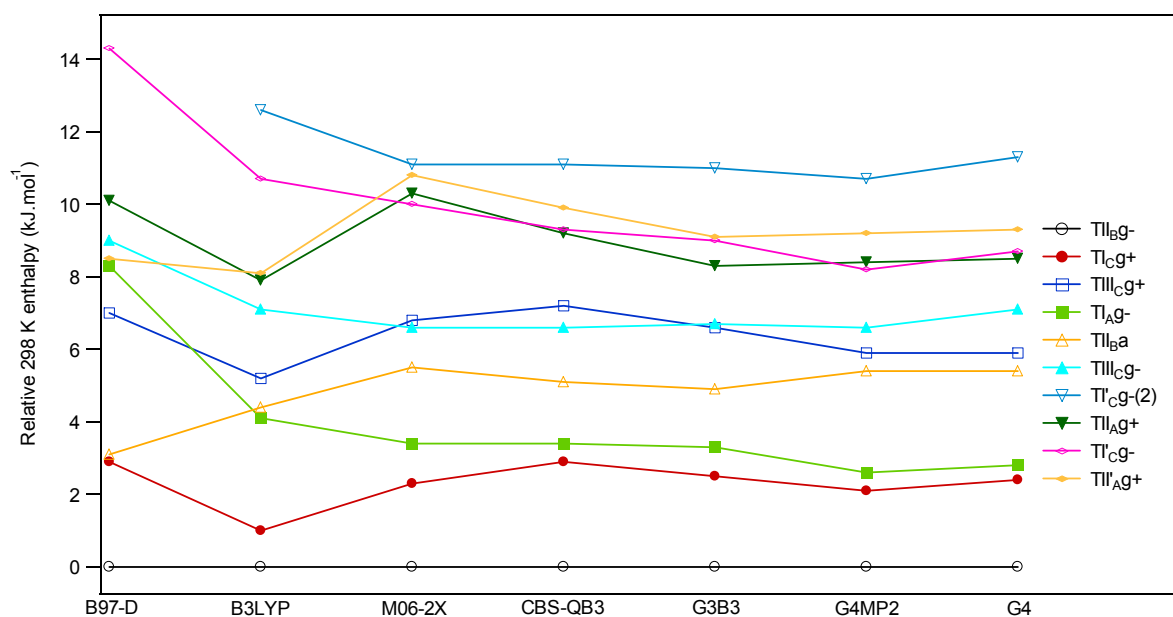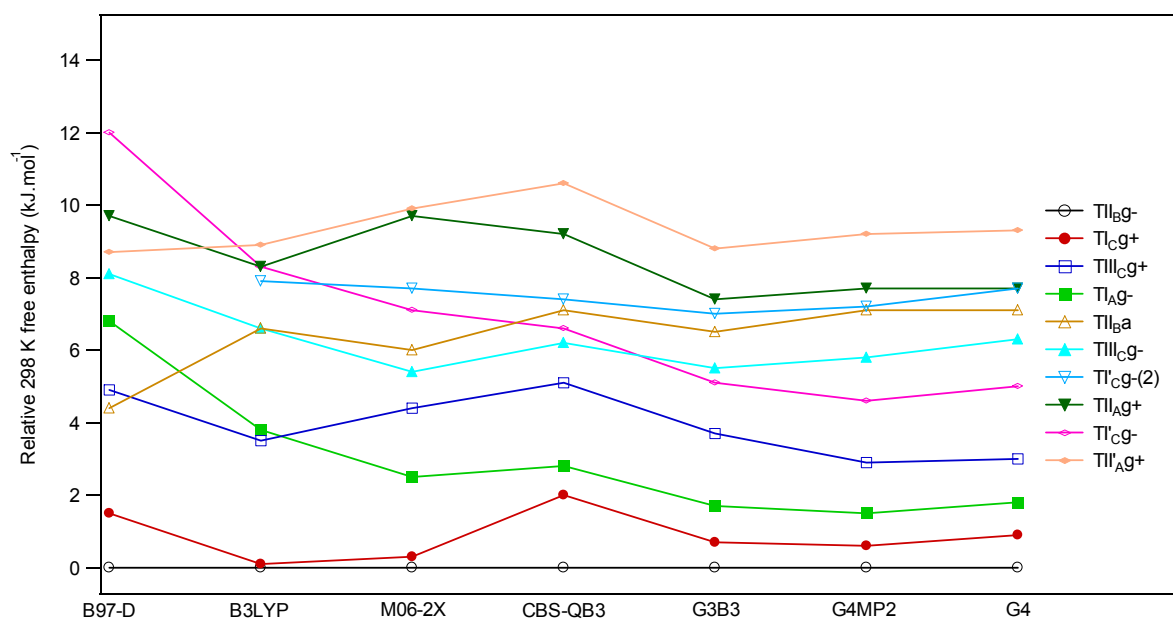

Figure S5 Relative  $H^{\circ}_{298}$  and  $G^{\circ}_{298}$  ( $\text{kJ mol}^{-1}$ ) of the four most stable conformers of deprotonated L-threonine.

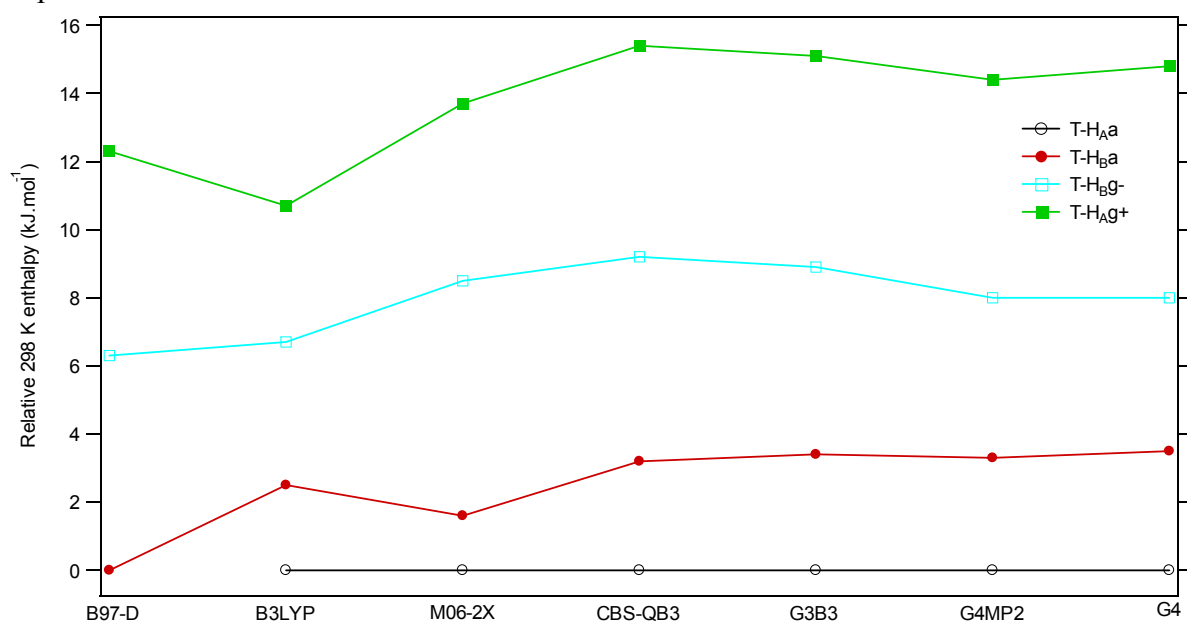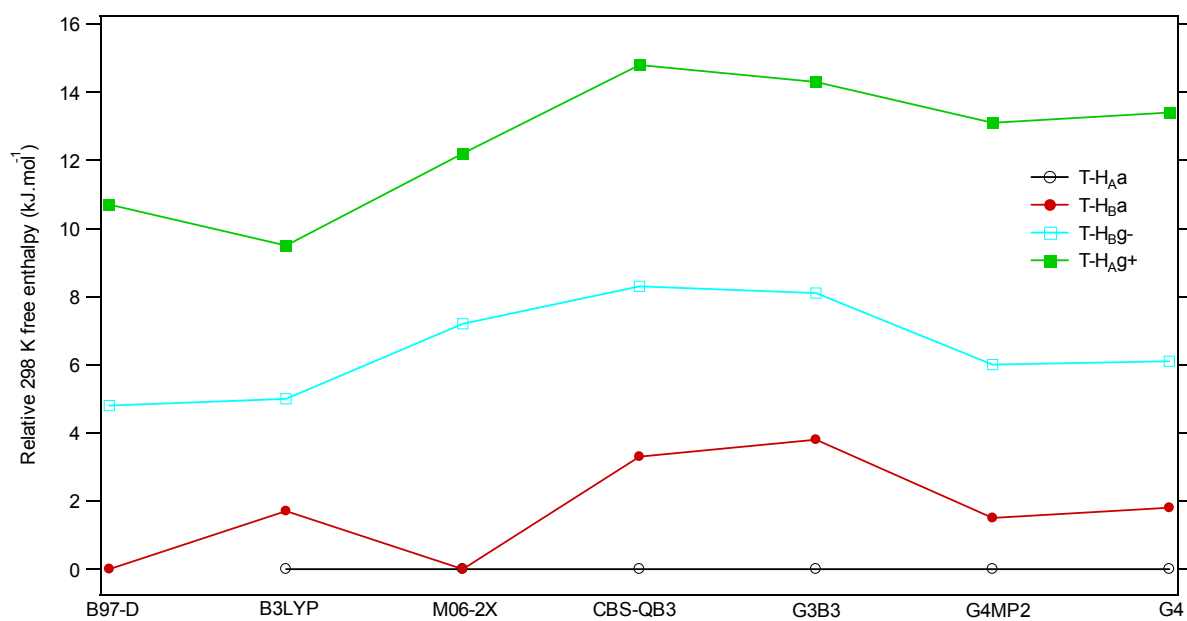

Figure S6 Relative  $H^{\circ}_{298}$  and  $G^{\circ}_{298}$  ( $\text{kJ mol}^{-1}$ ) of the four most stable conformers of protonated L-threonine.

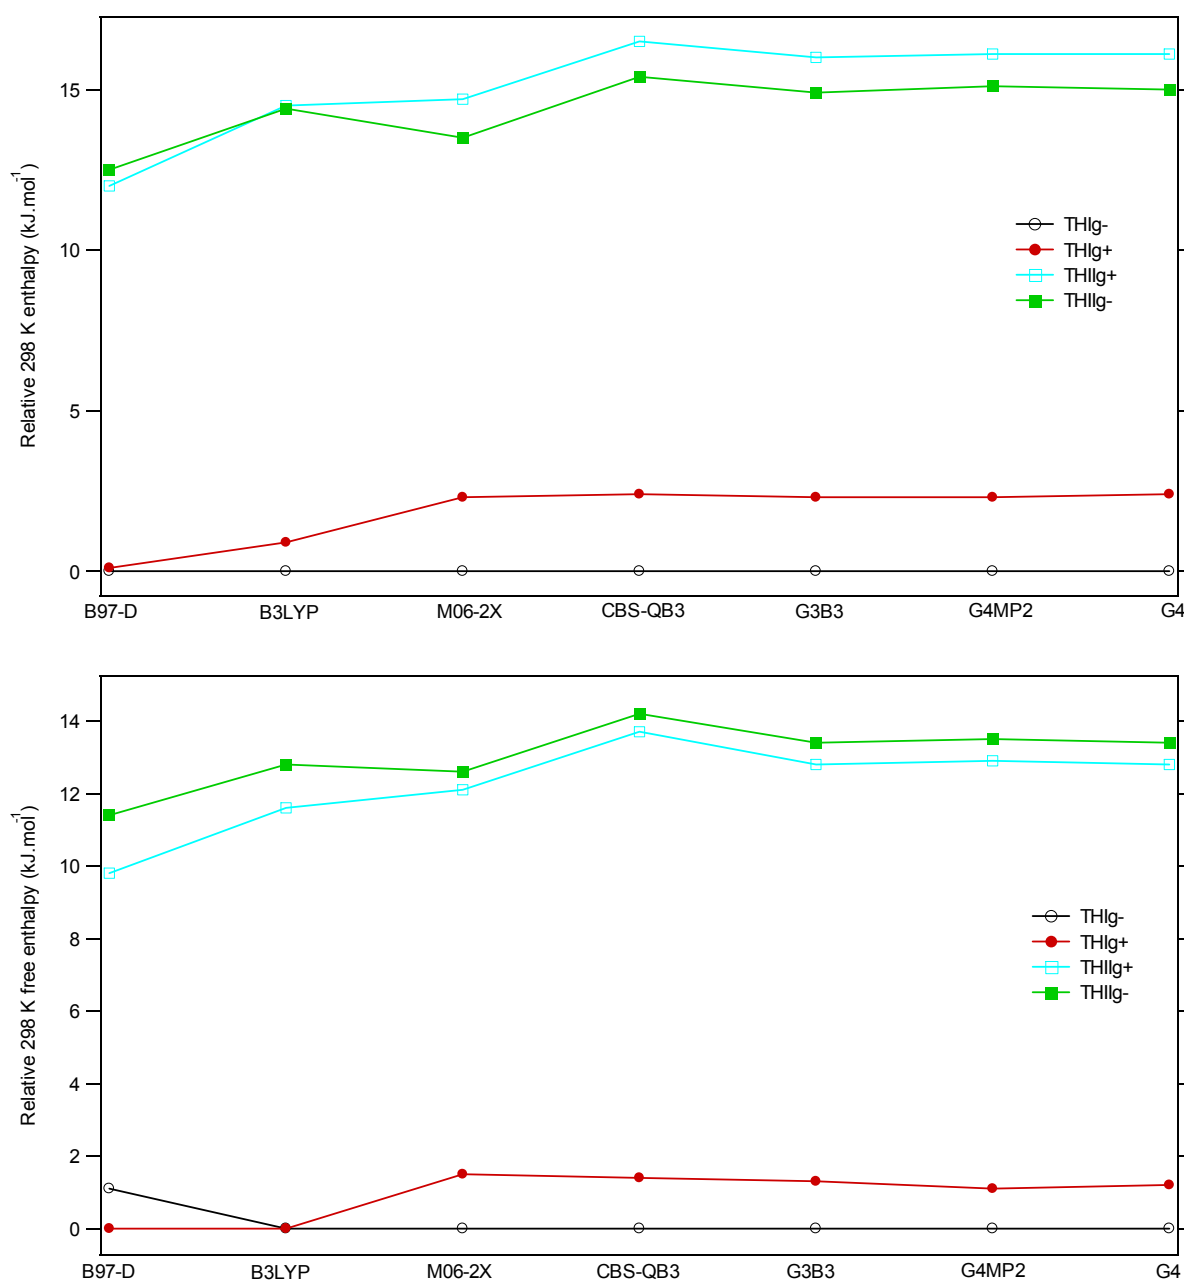

Figure S7. Optimized B3LYP/6-31+G(d,p) geometries of the first twelve conformers of neutral L-threonine (into brackets, relative  $H^{\circ}_{298}$  and  $G^{\circ}_{298}$  in  $\text{kJ mol}^{-1}$  calculated at the G4 level).

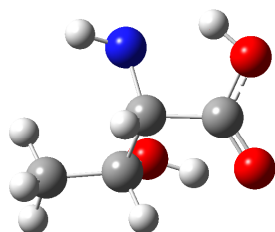

THR1 [0.0; 0.0]

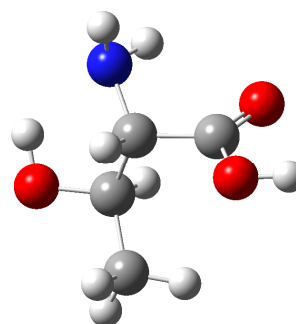

THR2 [1.0; 0.1]

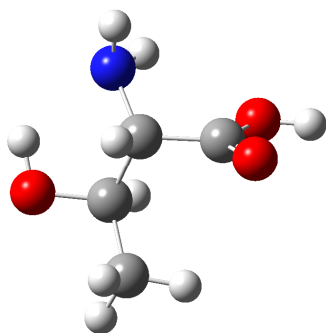

THR3 [5.2; 3.5]

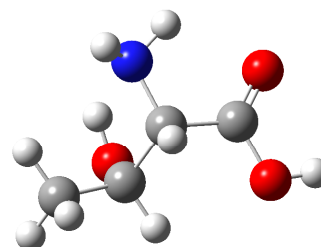

THR4 [4.1; 3.8]

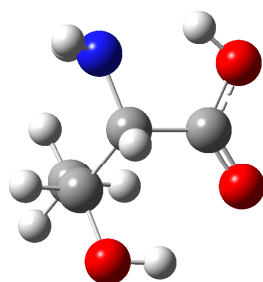

THR5 [4.4; 6.6]

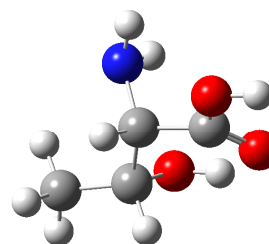

THR6 [7.1; 6.6]

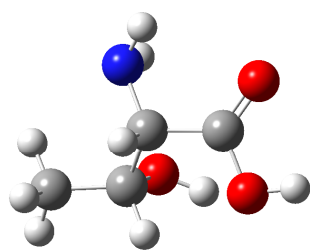

THR7 [12.6; 7.9]

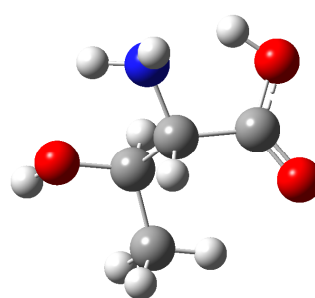

THR8 [7.9; 8.3]

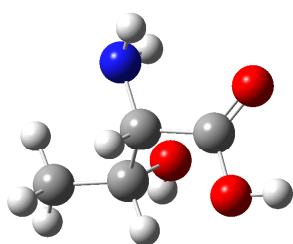

THR9 [10.7; 8.3]

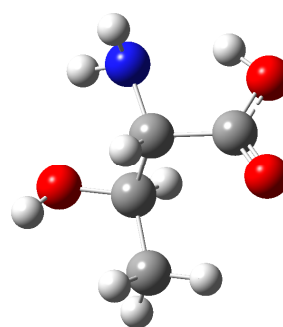

THR10 [8.1; 8.9]

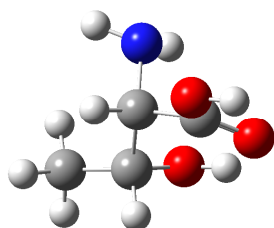

THR11 [10.3; 9.8]

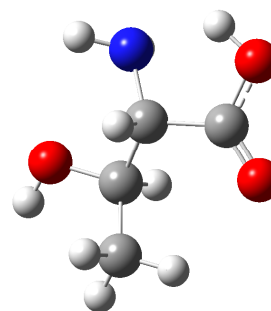

THR12 [11.1; 10.2]



Figure S8. Optimized B3LYP/6-31+G(d,p) geometries of the first four conformers of deprotonated L-threonine (into brackets, relative  $H^{\circ}_{298}$  and  $G^{\circ}_{298}$  in  $\text{kJ mol}^{-1}$  calculated).

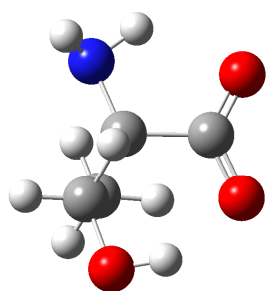

THR-H1 [0.0; 0.0]

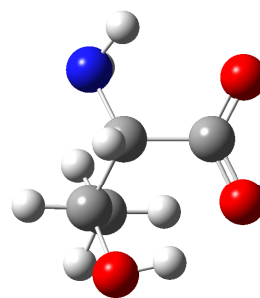

THR-H2 [2.5; 1,7]

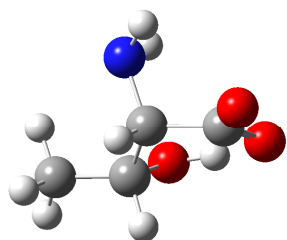

THR-H3 [6.7; 5.0]

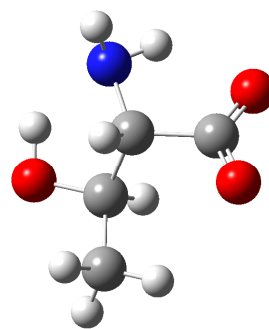

THR-H4 [10.7; 9.5]

Figure S9. Optimized B3LYP/6-31+G(d,p) geometries of the first four conformers of protonated L-threonine (into brackets, relative  $H^{\circ}_{298}$  and  $G^{\circ}_{298}$  in  $\text{kJ mol}^{-1}$  calculated).

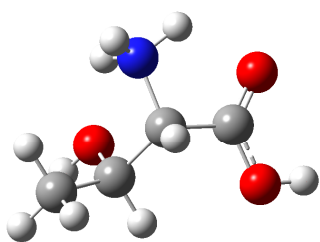

THR+1 [0.0; 0.0]

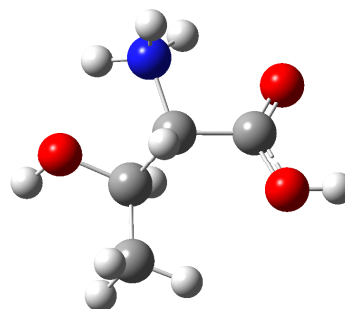

THR+2 [0.9; 0.0]

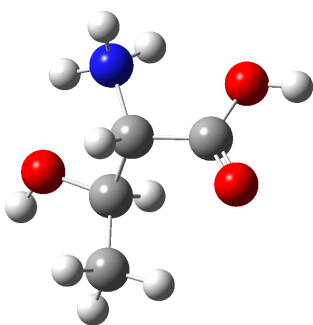

THR+3 [14.5; 11.6]

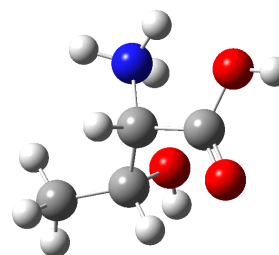

THR+4 [14.4; 12.8]

Table T2. Relative energies calculated with Composite methods and DFT for different forms of L-threonine.  
**B97D/6-31+G(d,p)**

| Files       | H(0K/hartree)      | H(298/hartree)     | G(298/hartree)     | delta H    | delta G    | S            | xibrut      | xinorm      | Smix         | Hi                 | Si                | Gi                |
|-------------|--------------------|--------------------|--------------------|------------|------------|--------------|-------------|-------------|--------------|--------------------|-------------------|-------------------|
| THR1        | -437,902638        | -437,89279         | -437,936239        | 0,0        | 0,0        | 382,8        | 1,00        | 0,49        | 2,91         | -213,077339        | 186,2709          | -213,098481       |
| THR2        | -437,901727        | -437,891673        | -437,935677        | 2,9        | 1,5        | 387,7        | 0,55        | 0,27        | 2,94         | -118,089197        | 104,551772        | -118,101063       |
| THR3        | -437,900212        | -437,890105        | -437,934358        | 7,0        | 4,9        | 389,9        | 0,14        | 0,07        | 1,51         | -29,5541112        | 26,3142652        | -29,5570979       |
| THR4        | -437,899762        | -437,889632        | -437,933646        | 8,3        | 6,8        | 387,8        | 0,07        | 0,03        | 0,91         | -13,9919111        | 12,3907893        | -13,9933174       |
| THR5        | -437,90133         | -437,891611        | -437,934554        | 3,1        | 4,4        | 378,3        | 0,17        | 0,08        | 1,72         | -36,3089948        | 31,3715329        | -36,3125555       |
| <b>THR6</b> | <b>-437,899346</b> | <b>-437,889381</b> | <b>-437,933164</b> | <b>9,0</b> | <b>8,1</b> | <b>385,7</b> | <b>0,04</b> | <b>0,02</b> | <b>0,63</b>  | <b>-8,43409491</b> | <b>7,42976957</b> | <b>-8,4349382</b> |
| THR8        | -437,898907        | -437,888945        | -437,932549        | 10,1       | 9,7        | 384,2        | 0,02        | 0,01        | 0,39         | -4,42118789        | 3,87879726        | -4,42162814       |
| THR9        | -437,89766         | -437,887328        | -437,93168         | 14,3       | 12,0       | 390,8        | 0,01        | 0,00        | 0,19         | -1,77496538        | 1,5839318         | -1,77514516       |
| THR10       | -437,899388        | -437,889538        | -437,932922        | 8,5        | 8,7        | 382,2        | 0,03        | 0,01        | 0,52         | -6,54128982        | 5,70984307        | -6,5419379        |
| THR11       | -437,8982          | -437,888098        | -437,932356        | 12,3       | 10,2       | 389,9        | 0,02        | 0,01        | 0,33         | -3,61003648        | 3,21466701        | -3,61040135       |
| THR12       | -437,897855        | -437,887814        | -437,931835        | 13,1       | 11,6       | 387,8        | 0,01        | 0,00        | 0,21         | -2,08874421        | 1,85002698        | -2,08895419       |
| <b>THR7</b> | <b>-437,899346</b> | <b>-437,889381</b> | <b>-437,933166</b> | <b>9,0</b> | <b>8,1</b> | <b>387,8</b> | <b>0,01</b> | <b>1,00</b> | <b>12,26</b> | <b>-437,891871</b> | <b>384,566295</b> | <b>-437,93552</b> |
| THR+1       | -438,25327         | -438,242971        | -438,28717         | 0,0        | 1,1        | 389,4        | 0,65        | 0,39        | 3,05         | -169,638511        | 150,736246        | -169,65562        |
| THR+2       | -438,253325        | -438,24293         | -438,287579        | 0,1        | 0,0        | 393,4        | 1,00        | 0,59        | 2,57         | -260,655986        | 233,970056        | -260,682542       |
| THR+3       | -438,248977        | -438,238386        | -438,283856        | 12,0       | 9,8        | 400,6        | 0,02        | 0,01        | 0,44         | -5,22417299        | 4,77559894        | -5,22471503       |
| THR+4       | -438,248782        | -438,238216        | -438,283236        | 12,5       | 11,4       | 396,6        | 0,01        | 0,01        | 0,26         | -2,72419267        | 2,46563521        | -2,72447253       |
| THR-H2      | -437,373831        | -437,364362        | -437,407003        | 0,0        | 0,0        | 375,7        | 1,00        | 0,86        | 1,08         | -376,154389        | 323,106638        | -376,191062       |
| THR-H3      | -437,371486        | -437,361945        | -437,405188        | 6,3        | 4,8        | 381,0        | 0,15        | 0,13        | 2,19         | -55,9177097        | 48,710205         | -55,9232384       |
| THR-H4      | -437,369372        | -437,359689        | -437,402943        | 12,3       | 10,7       | 381,1        | 0,01        | 0,01        | 0,44         | -5,29189806        | 4,61099607        | -5,29242142       |
| THR-H1      | -437,373825        | -437,364357        | -437,406994        | 0,0        | 0,0        | 375,7        | 1,00        | 0,86        | 1,08         | -376,154389        | 323,106638        | -376,191062       |

**B3LYP/6-31+G(d,p)**

| Files  | H(0K/hartree) | H(298/hartree) | G(298/hartree) | delta H | delta G | S     | xibrut      | xinorm | Smix         | Hi                 | Si                | Gi                 |
|--------|---------------|----------------|----------------|---------|---------|-------|-------------|--------|--------------|--------------------|-------------------|--------------------|
| THR1   | -438,17654    | -438,16679     | -438,210241    | 0,0     | 0,0     | 382,8 | 1,00        | 0,36   | 3,06         | -158,517802        | 138,495008        | -158,533522        |
| THR2   | -438,176303   | -438,166416    | -438,21022     | 1,0     | 0,1     | 385,9 | 0,98        | 0,35   | 3,06         | -155,059955        | 136,57465         | -155,075457        |
| THR3   | -438,174764   | -438,1648      | -438,208911    | 5,2     | 3,5     | 388,6 | 0,25        | 0,09   | 1,80         | -39,2164524        | 34,7835161        | -39,2204004        |
| THR4   | -438,175119   | -438,165216    | -438,208783    | 4,1     | 3,8     | 383,8 | 0,22        | 0,08   | 1,66         | -34,283758         | 30,033361         | -34,2871668        |
| THR5   | -438,174651   | -438,165101    | -438,207736    | 4,4     | 6,6     | 375,6 | 0,07        | 0,03   | 0,79         | -11,4170979        | 9,78768465        | -11,4182089        |
| THR6   | -438,173958   | -438,164085    | -438,207725    | 7,1     | 6,6     | 384,5 | 0,07        | 0,03   | 0,78         | -11,2859381        | 9,90333309        | -11,2870621        |
| THR7   | -438,172275   | -438,161993    | -438,207216    | 12,6    | 7,9     | 398,4 | 0,04        | 0,02   | 0,53         | -6,61275895        | 6,01316494        | -6,61344146        |
| THR8   | -438,173555   | -438,163771    | -438,207081    | 7,9     | 8,3     | 381,6 | 0,04        | 0,01   | 0,47         | -5,73867309        | 4,99757088        | -5,73924033        |
| THR9   | -438,172976   | -438,162705    | -438,207065    | 10,7    | 8,3     | 390,8 | 0,04        | 0,01   | 0,47         | -5,64303692        | 5,03343864        | -5,64360823        |
| THR10  | -438,173403   | -438,163689    | -438,206865    | 8,1     | 8,9     | 380,4 | 0,03        | 0,01   | 0,40         | -4,57398414        | 3,97096842        | -4,57443485        |
| THR11  | -438,172786   | -438,16286     | -438,206498    | 10,3    | 9,8     | 384,5 | 0,02        | 0,01   | 0,29         | -3,11104703        | 2,72980491        | -3,11135687        |
| THR12  | -438,172473   | -438,162556    | -438,206365    | 11,1    | 10,2    | 386,0 | 0,02        | 0,01   | 0,26         | -2,7054873         | 2,38324854        | -2,7057578         |
|        |               |                |                |         |         |       | <b>1,00</b> |        | <b>13,56</b> | <b>-438,165992</b> | <b>384,705749</b> | <b>-438,209657</b> |
| THRH+1 | -438,524901   | -438,51488     | -438,558546    | 0,0     | 0,0     | 384,7 | 1,00        | 0,50   | 2,88         | -219,028631        | 192,156785        | -219,050441        |
| THRH+2 | -438,524607   | -438,514519    | -438,558533    | 0,9     | 0,0     | 387,8 | 0,99        | 0,49   | 2,90         | -216,058463        | 191,061817        | -216,080149        |
| THRH+3 | -438,519652   | -438,509358    | -438,554131    | 14,5    | 11,6    | 394,5 | 0,01        | 0,00   | 0,21         | -2,12241982        | 1,90925695        | -2,12263653        |
| THRH+4 | -438,51963    | -438,509396    | -438,553668    | 14,4    | 12,8    | 390,1 | 0,01        | 0,00   | 0,14         | -1,30514527        | 1,16092683        | -1,30527703        |
|        |               |                |                |         |         |       | <b>1,00</b> |        | <b>6,14</b>  | <b>-438,514659</b> | <b>386,288785</b> | <b>-438,558504</b> |
| THR-H1 | -437,651735   | -437,642328    | -437,684881    | 0,0     | 0,0     | 374,9 | 1,00        | 0,60   | 2,54         | -262,956947        | 225,26373         | -262,982515        |
| THR-H2 | -437,650883   | -437,641386    | -437,684232    | 2,5     | 1,7     | 377,5 | 0,51        | 0,30   | 3,01         | -133,007879        | 114,726838        | -133,0209          |
| THR-H3 | -437,649247   | -437,639794    | -437,682985    | 6,7     | 5,0     | 380,5 | 0,14        | 0,08   | 1,71         | -35,9024424        | 31,2173625        | -35,9059857        |
| THR-H4 | -437,647719   | -437,638253    | -437,681245    | 10,7    | 9,5     | 378,8 | 0,02        | 0,01   | 0,47         | -5,77451232        | 4,99785261        | -5,77507959        |
|        |               |                |                |         |         |       | <b>1,00</b> |        | <b>7,73</b>  | <b>-437,64178</b>  | <b>376,205783</b> | <b>-437,68448</b>  |

**M06-2X/6-31+G(d,p)**

| Files  | H(0K/hartree) | H(298/hartree) | G(298/hartree) | delta H | delta G | S     | xibrut      | xinorm      | Smix         | Hi                 | Si                | Gi                 |
|--------|---------------|----------------|----------------|---------|---------|-------|-------------|-------------|--------------|--------------------|-------------------|--------------------|
| THR1   | -437,98531    | -437,975793    | -438,018456    | 0,0     | 0,0     | 375,9 | 1,00        | 0,35        | 3,06         | -154,716491        | 132,780301        | -154,731562        |
| THR2   | -437,984697   | -437,974926    | -438,01836     | 2,3     | 0,3     | 382,7 | 0,90        | 0,32        | 3,03         | -139,878358        | 122,215661        | -139,89223         |
| THR3   | -437,982983   | -437,973199    | -438,016794    | 6,8     | 4,4     | 384,1 | 0,17        | 0,06        | 1,43         | -27,0086188        | 23,6857576        | -27,0113072        |
| THR4   | -437,984203   | -437,974496    | -438,017512    | 3,4     | 2,5     | 379,0 | 0,37        | 0,13        | 2,21         | -57,4090864        | 49,6772557        | -57,4147249        |
| THR5   | -437,98318    | -437,973713    | -438,016182    | 5,5     | 6,0     | 374,2 | 0,09        | 0,03        | 0,92         | -14,2027386        | 12,1336606        | -14,2041158        |
| THR6   | -437,982964   | -437,973279    | -438,016402    | 6,6     | 5,4     | 379,9 | 0,12        | 0,04        | 1,09         | -17,894221         | 15,5227945        | -17,8959829        |
| THR7   | -437,981532   | -437,971554    | -438,015535    | 11,1    | 7,7     | 387,5 | 0,05        | 0,02        | 0,56         | -7,19906008        | 6,36928602        | -7,19978301        |
| THR8   | -437,981462   | -437,971868    | -438,014763    | 10,3    | 9,7     | 377,9 | 0,02        | 0,01        | 0,30         | -3,20014714        | 2,76137992        | -3,20046056        |
| THR9   | -437,982019   | -437,972003    | -438,015739    | 10,0    | 7,1     | 385,3 | 0,06        | 0,02        | 0,66         | -8,9190755         | 7,84708416        | -8,91996616        |
| THR10  | -437,981307   | -437,971696    | -438,014693    | 10,8    | 9,9     | 378,8 | 0,02        | 0,01        | 0,28         | -2,97332958        | 2,57176286        | -2,97362148        |
| THR11  | -437,981241   | -437,971554    | -438,014686    | 11,1    | 9,9     | 380,0 | 0,02        | 0,01        | 0,28         | -2,95155064        | 2,56094169        | -2,95184131        |
| THR12  | -437,980517   | -437,970757    | -438,014116    | 13,2    | 11,4    | 382,0 | 0,01        | 0,00        | 0,17         | -1,62208905        | 1,41483109        | -1,62224963        |
|        |               |                |                |         |         |       | <b>1,00</b> | <b>1,00</b> | <b>13,99</b> | <b>-437,974765</b> | <b>379,540716</b> | <b>-438,017844</b> |
| THRH+1 | -438,330732   | -438,320762    | -438,364287    | 0,0     | 0,0     | 383,5 | 1,00        | 0,64        | 2,39         | -279,339836        | 244,385464        | -279,367575        |
| THRH+2 | -438,329885   | -438,319888    | -438,363726    | 2,3     | 1,5     | 386,2 | 0,55        | 0,35        | 3,06         | -154,975168        | 136,558089        | -154,990668        |
| THRH+3 | -438,325305   | -438,315153    | -438,359883    | 14,7    | 12,1    | 392,3 | 0,01        | 0,01        | 0,22         | -2,21953008        | 1,98665751        | -2,21975557        |
| THRH+4 | -438,32564    | -438,315611    | -438,359476    | 13,5    | 12,6    | 386,5 | 0,01        | 0,00        | 0,19         | -1,78586902        | 1,57462287        | -1,78604774        |
|        |               |                |                |         |         |       | <b>1,00</b> | <b>1,00</b> | <b>5,85</b>  | <b>-438,320404</b> | <b>384,504833</b> | <b>-438,364046</b> |
| THR-H1 | -437,459368   | -437,450086    | -437,492367    | 0,0     | 0,0     | 372,5 | 0,99        | 0,48        | 2,93         | -210,463325        | 179,221014        | -210,483667        |
| THR-H2 | -437,45892    | -437,449483    | -437,492381    | 1,6     | 0,0     | 377,9 | 1,00        | 0,49        | 2,91         | -213,580291        | 184,529612        | -213,601235        |
| THR-H3 | -437,456172   | -437,446853    | -437,48962     | 8,5     | 7,2     | 376,8 | 0,06        | 0,03        | 0,81         | -11,7564805        | 10,1264349        | -11,7576299        |
| THR-H4 | -437,454286   | -437,444883    | -437,48775     | 13,7    | 12,2    | 377,7 | 0,01        | 0,00        | 0,17         | -1,64958892        | 1,42420084        | -1,64975057        |
|        |               |                |                |         |         |       | <b>1,00</b> | <b>1,00</b> | <b>6,82</b>  | <b>-437,449685</b> | <b>375,301262</b> | <b>-437,492283</b> |

**CBS-QB3**

| Files   | H(0K/hartree) | H(298/hartree) | G(298/hartree) | delta H | delta G | S     | xibrut | xinorm      | Smix         | Hi                 | Si                | Gi                 |
|---------|---------------|----------------|----------------|---------|---------|-------|--------|-------------|--------------|--------------------|-------------------|--------------------|
| THR1    | -437,637325   | -437,627609    | -437,6709      | 0,0     | 0,0     | 381,4 | 1,00   | 0,45        | 2,99         | -195,7709          | 170,622696        | -195,790266        |
| THR2    | -437,636356   | -437,626491    | -437,670145    | 2,9     | 2,0     | 384,6 | 0,45   | 0,20        | 2,69         | -88,5919984        | 77,859336         | -88,6008356        |
| THR3    | -437,634828   | -437,62488     | -437,668944    | 7,2     | 5,1     | 388,2 | 0,13   | 0,06        | 1,36         | -25,0969835        | 22,263795         | -25,0995105        |
| THR4    | -437,636215   | -437,626313    | -437,669821    | 3,4     | 2,8     | 383,3 | 0,32   | 0,14        | 2,32         | -63,0404343        | 55,217997         | -63,0467017        |
| THR5    | -437,635197   | -437,625668    | -437,668192    | 5,1     | 7,1     | 374,7 | 0,06   | 0,03        | 0,79         | -11,3929992        | 9,753605          | -11,3941063        |
| THR6    | -437,634926   | -437,625086    | -437,66852     | 6,6     | 6,2     | 382,7 | 0,08   | 0,04        | 1,01         | -16,0781842        | 14,059192         | -16,0797799        |
| THR7    | -437,633559   | -437,623385    | -437,668094    | 11,1    | 7,4     | 393,9 | 0,05   | 0,02        | 0,73         | -10,2787046        | 9,251850          | -10,2797548        |
| THR8    | -437,6339     | -437,624123    | -437,667389    | 9,2     | 9,2     | 381,2 | 0,03   | 0,01        | 0,42         | -4,90220415        | 4,270047          | -4,90268881        |
| THR9    | -437,634332   | -437,62405     | -437,668401    | 9,3     | 6,6     | 390,8 | 0,07   | 0,03        | 0,92         | -14,1892859        | 12,669472         | -14,1907239        |
| THR10   | -437,63352    | -437,623855    | -437,666879    | 9,9     | 10,6    | 379,1 | 0,01   | 0,01        | 0,27         | -2,86934081        | 2,485351          | -2,8696229         |
| THR11   | -437,633629   | -437,623747    | -437,667201    | 10,1    | 9,7     | 382,8 | 0,02   | 0,01        | 0,36         | -4,02387944        | 3,520218          | -4,02427899        |
| THR12   | -437,632468   | -437,622546    | -437,66619     | 13,3    | 12,4    | 384,5 | 0,01   | 0,00        | 0,15         | -1,391652          | 1,222788          | -1,39179078        |
|         |               |                |                |         |         |       |        | <b>1,00</b> | <b>14,02</b> | <b>-437,626566</b> | <b>383,196348</b> | <b>-437,67006</b>  |
| THRHH+1 | -437,984029   | -437,974037    | -438,017586    | 0,0     | 0,0     | 383,7 | 1,00   | 0,63        | 2,40         | -277,574373        | 243,167174        | -277,601973        |
| THRHH+2 | -437,983197   | -437,973129    | -438,017051    | 2,4     | 1,4     | 387,0 | 0,57   | 0,36        | 3,06         | -158,25851         | 139,829071        | -158,274381        |
| THRHH+3 | -437,978003   | -437,967756    | -438,012383    | 16,5    | 13,7    | 393,2 | 0,00   | 0,00        | 0,13         | -1,17572381        | 1,05549609        | -1,17584361        |
| THRHH+4 | -437,978339   | -437,968176    | -438,012195    | 15,4    | 14,2    | 387,8 | 0,00   | 0,00        | 0,11         | -0,9650719         | 0,85458063        | -0,9651689         |
|         |               |                |                |         |         |       |        | <b>1,00</b> | <b>5,71</b>  | <b>-437,973679</b> | <b>384,906322</b> | <b>-438,017367</b> |
| THR-H1  | -437,111395   | -437,102032    | -437,144475    | 0,0     | 0,0     | 373,9 | 1,00   | 0,77        | 1,70         | -334,468186        | 286,13687         | -334,500664        |
| THR-H2  | -437,110185   | -437,100798    | -437,143223    | 3,2     | 3,3     | 373,8 | 0,27   | 0,21        | 2,70         | -89,8093009        | 76,7993114        | -89,8180178        |
| THR-H3  | -437,107904   | -437,098543    | -437,141301    | 9,2     | 8,3     | 376,7 | 0,04   | 0,03        | 0,82         | -11,9317031        | 10,283388         | -11,9328703        |
| THR-H4  | -437,105555   | -437,096182    | -437,138832    | 15,4    | 14,8    | 375,8 | 0,00   | 0,00        | 0,11         | -0,89248085        | 0,76724963        | -0,89256794        |
|         |               |                |                |         |         |       |        | <b>1,00</b> | <b>5,33</b>  | <b>-437,101671</b> | <b>373,986819</b> | <b>-437,14412</b>  |

**G3B3**

| Files  | H(0K/hartree) | H(298/hartree) | G(298/hartree) | delta H | delta G | S     | xibrut | xinorm      | Smix         | Hi                 | Si                | Gi                 |
|--------|---------------|----------------|----------------|---------|---------|-------|--------|-------------|--------------|--------------------|-------------------|--------------------|
| THR1   | -437,997985   | -437,988198    | -438,031447    | 0,0     | 0,0     | 381,0 | 1,00   | 0,33        | 3,05         | -146,224043        | 127,212038        | -146,238482        |
| THR2   | -437,997273   | -437,987255    | -438,031195    | 2,5     | 0,7     | 387,1 | 0,77   | 0,26        | 2,90         | -112,222941        | 99,1918483        | -112,234199        |
| THR3   | -437,995782   | -437,985684    | -438,030029    | 6,6     | 3,7     | 390,7 | 0,23   | 0,08        | 1,62         | -32,981627         | 29,4206713        | -32,9849663        |
| THR4   | -437,997016   | -437,986952    | -438,030803    | 3,3     | 1,7     | 386,3 | 0,51   | 0,17        | 2,50         | -74,3518342        | 65,585189         | -74,3592783        |
| THR5   | -437,995952   | -437,986323    | -438,028962    | 4,9     | 6,5     | 375,7 | 0,07   | 0,02        | 0,76         | -10,755193         | 9,22487368        | -10,75624          |
| THR6   | -437,995616   | -437,985637    | -438,029367    | 6,7     | 5,5     | 385,3 | 0,11   | 0,04        | 1,03         | -16,4564606        | 14,4761075        | -16,4581036        |
| THR7   | -437,99429    | -437,984013    | -438,028762    | 11,0    | 7,0     | 394,3 | 0,06   | 0,02        | 0,65         | -8,71759531        | 7,84725091        | -8,71848599        |
| THR8   | -437,994976   | -437,985038    | -438,028612    | 8,3     | 7,4     | 383,9 | 0,05   | 0,02        | 0,58         | -7,44703356        | 6,52750516        | -7,44777444        |
| THR9   | -437,995243   | -437,984788    | -438,029508    | 9,0     | 5,1     | 394,0 | 0,13   | 0,04        | 1,14         | -19,0829335        | 17,1665753        | -19,084882         |
| THR10  | -437,994565   | -437,984733    | -438,028086    | 9,1     | 8,8     | 382,0 | 0,03   | 0,01        | 0,38         | -4,28623993        | 3,73794081        | -4,28666642        |
| THR11  | -437,994287   | -437,984289    | -438,027975    | 10,3    | 9,1     | 384,9 | 0,03   | 0,01        | 0,34         | -3,81460325        | 3,35219198        | -3,81498373        |
| THR12  | -437,993352   | -437,98329     | -438,027175    | 12,9    | 11,2    | 386,6 | 0,01   | 0,00        | 0,17         | -1,64653714        | 1,4535362         | -1,64670212        |
|        |               |                |                |         |         |       |        | <b>1,00</b> | <b>15,10</b> | <b>-437,987041</b> | <b>385,195728</b> | <b>-438,030762</b> |
| THR+1  | -438,345683   | -438,335532    | -438,379378    | 0,0     | 0,0     | 386,3 | 1,00   | 0,62        | 2,46         | -272,650991        | 240,284713        | -272,678264        |
| THR+2  | -438,344891   | -438,334665    | -438,378887    | 2,3     | 1,3     | 389,6 | 0,60   | 0,37        | 3,06         | -162,803244        | 144,707612        | -162,819669        |
| THR+3  | -438,33986    | -438,329422    | -438,374497    | 16,0    | 12,8    | 397,1 | 0,01   | 0,00        | 0,17         | -1,61955662        | 1,46732733        | -1,61972316        |
| THR+4  | -438,340199   | -438,329842    | -438,374259    | 14,9    | 13,4    | 391,3 | 0,00   | 0,00        | 0,14         | -1,26137926        | 1,12613285        | -1,26150708        |
|        |               |                |                |         |         |       |        | <b>1,00</b> | <b>5,83</b>  | <b>-438,335171</b> | <b>387,585785</b> | <b>-438,379163</b> |
| THR-H1 | -437,470787   | -437,461318    | -437,503932    | 0,0     | 0,0     | 375,4 | 1,00   | 0,80        | 1,51         | -348,124349        | 298,774001        | -348,15826         |
| THR-H2 | -437,469465   | -437,460015    | -437,502467    | 3,4     | 3,8     | 374,0 | 0,21   | 0,17        | 2,51         | -74,7398757        | 63,9010394        | -74,7471287        |
| THR-H3 | -437,467378   | -437,457918    | -437,500834    | 8,9     | 8,1     | 378,1 | 0,04   | 0,03        | 0,89         | -13,4507164        | 11,6258343        | -13,4520359        |
| THR-H4 | -437,46508    | -437,45557     | -437,498489    | 15,1    | 14,3    | 378,1 | 0,00   | 0,00        | 0,13         | -1,14603482        | 0,99062484        | -1,14614726        |
|        |               |                |                |         |         |       |        | <b>1,00</b> | <b>5,04</b>  | <b>-437,460976</b> | <b>375,2915</b>   | <b>-437,503572</b> |

**G4MP2**

| Files  | H(0K/hartree) | H(298/hartree) | G(298/hartree) | delta H | delta G | S            | xibrut      | xinorm      | Smix         | Hi                 | Si                | Gi                 |
|--------|---------------|----------------|----------------|---------|---------|--------------|-------------|-------------|--------------|--------------------|-------------------|--------------------|
| THR1   | -437,744103   | -437,734376    | -437,777588    | 0,0     | 0,0     | 380,7        | 1,00        | 0,32        | 3,03         | -140,687906        | 122,361907        | -140,701794        |
| THR2   | -437,743497   | -437,733563    | -437,777344    | 2,1     | 0,6     | 385,7        | 0,77        | 0,25        | 2,88         | -108,885116        | 95,9489235        | -108,896006        |
| THR3   | -437,742183   | -437,732139    | -437,776465    | 5,9     | 2,9     | 390,5        | 0,31        | 0,10        | 1,90         | -43,2572259        | 38,5926438        | -43,2616062        |
| THR4   | -437,743344   | -437,733388    | -437,777013    | 2,6     | 1,5     | 384,4        | 0,55        | 0,18        | 2,54         | -76,9131409        | 67,5339376        | -76,9208062        |
| THR5   | -437,741898   | -437,732327    | -437,774895    | 5,4     | 7,1     | 375,0        | 0,06        | 0,02        | 0,63         | -8,31740844        | 7,12620666        | -8,31821729        |
| THR6   | -437,741724   | -437,731858    | -437,775364    | 6,6     | 5,8     | 383,3        | 0,10        | 0,03        | 0,90         | -13,6112064        | 11,9188232        | -13,6125592        |
| THR7   | -437,740456   | -437,730302    | -437,774864    | 10,7    | 7,2     | 392,6        | 0,06        | 0,02        | 0,61         | -8,05094838        | 7,22105849        | -8,05176798        |
| THR8   | -437,741048   | -437,731172    | -437,774666    | 8,4     | 7,7     | 383,2        | 0,05        | 0,01        | 0,52         | -6,53944489        | 5,72477626        | -6,54009467        |
| THR9   | -437,741615   | -437,731244    | -437,775842    | 8,2     | 4,6     | 392,9        | 0,16        | 0,05        | 1,27         | -22,485882         | 20,1842921        | -22,488173         |
| THR10  | -437,740608   | -437,730865    | -437,774065    | 9,2     | 9,2     | 380,6        | 0,02        | 0,01        | 0,32         | -3,47877904        | 3,02481752        | -3,47912236        |
| THR11  | -437,74059    | -437,730701    | -437,774171    | 9,6     | 9,0     | 383,0        | 0,03        | 0,01        | 0,35         | -3,88841728        | 3,40213275        | -3,88880343        |
| THR12  | -437,739533   | -437,729534    | -437,773336    | 12,7    | 11,2    | 385,9        | 0,01        | 0,00        | 0,17         | -1,61782482        | 1,42631465        | -1,61798671        |
|        |               |                |                |         |         | <b>15,12</b> | <b>1,00</b> | <b>1,00</b> | <b>15,12</b> | <b>-437,7333</b>   | <b>384,465833</b> | <b>-437,776937</b> |
| THR+1  | -438,092031   | -438,08205     | -438,125568    | 0,0     | 0,0     | 383,4        | 1,00        | 0,60        | 2,54         | -263,283643        | 230,426862        | -263,309797        |
| THR+2  | -438,091284   | -438,081188    | -438,125163    | 2,3     | 1,1     | 387,4        | 0,65        | 0,39        | 3,05         | -172,069587        | 152,177736        | -172,08686         |
| THR+3  | -438,086216   | -438,075906    | -438,120672    | 16,1    | 12,9    | 394,4        | 0,01        | 0,00        | 0,17         | -1,53947079        | 1,38600927        | -1,53962811        |
| THR+4  | -438,086496   | -438,076294    | -438,120426    | 15,1    | 13,5    | 388,8        | 0,00        | 0,00        | 0,13         | -1,18897358        | 1,05529           | -1,18909336        |
|        |               |                |                |         |         | <b>5,89</b>  | <b>1,00</b> | <b>1,00</b> | <b>5,89</b>  | <b>-438,081674</b> | <b>385,045898</b> | <b>-438,125378</b> |
| THR-H1 | -437,215778   | -437,206458    | -437,248698    | 0,0     | 0,0     | 372,2        | 1,00        | 0,61        | 2,50         | -266,91744         | 227,200902        | -266,943228        |
| THR-H2 | -437,214662   | -437,205201    | -437,248117    | 3,3     | 1,5     | 378,1        | 0,54        | 0,33        | 3,04         | -145,005304        | 125,404628        | -145,019538        |
| THR-H3 | -437,212826   | -437,203429    | -437,246399    | 8,0     | 6,0     | 378,6        | 0,09        | 0,05        | 1,32         | -23,8676186        | 20,6674379        | -23,8699644        |
| THR-H4 | -437,21037    | -437,200959    | -437,243709    | 14,4    | 13,1    | 376,6        | 0,01        | 0,00        | 0,15         | -1,41549461        | 1,21943595        | -1,41563302        |
|        |               |                |                |         |         | <b>7,02</b>  | <b>1,00</b> | <b>1,00</b> | <b>7,02</b>  | <b>-437,205858</b> | <b>374,492404</b> | <b>-437,248364</b> |



G4

| Files  | H(0K/hartree) | H(298/hartree) | G(298/hartree) | delta H | delta G | S     | xibrut | xinorm      | Smix         | Hi                 | Si                | Gi                 |
|--------|---------------|----------------|----------------|---------|---------|-------|--------|-------------|--------------|--------------------|-------------------|--------------------|
| THR1   | -438,069832   | -438,060106    | -438,103318    | 0,0     | 0,0     | 380,7 | 1,00   | 0,34        | 3,05         | -150,141589        | 130,487055        | -150,156399        |
| THR2   | -438,069136   | -438,059202    | -438,102983    | 2,4     | 0,9     | 385,7 | 0,70   | 0,24        | 2,85         | -105,610702        | 92,9943486        | -105,621257        |
| THR3   | -438,067887   | -438,057843    | -438,102169    | 5,9     | 3,0     | 390,5 | 0,30   | 0,10        | 1,94         | -44,9204796        | 40,0467453        | -44,925025         |
| THR4   | -438,068982   | -438,059026    | -438,102651    | 2,8     | 1,8     | 384,4 | 0,50   | 0,17        | 2,51         | -74,52189          | 65,3856471        | -74,5293114        |
| THR5   | -438,067604   | -438,058033    | -438,100601    | 5,4     | 7,1     | 375,0 | 0,06   | 0,02        | 0,64         | -8,65537609        | 7,41025749        | -8,65621717        |
| THR6   | -438,067273   | -438,057408    | -438,100914    | 7,1     | 6,3     | 383,3 | 0,08   | 0,03        | 0,82         | -12,0238456        | 10,5210062        | -12,0250398        |
| THR7   | -438,065971   | -438,055817    | -438,100379    | 11,3    | 7,7     | 392,6 | 0,05   | 0,02        | 0,54         | -6,85536243        | 6,14414422        | -6,8560598         |
| THR8   | -438,066762   | -438,056886    | -438,10038     | 8,5     | 7,7     | 383,2 | 0,05   | 0,02        | 0,54         | -6,86258246        | 6,00319116        | -6,86326384        |
| THR9   | -438,067176   | -438,056804    | -438,101402    | 8,7     | 5,0     | 392,9 | 0,13   | 0,05        | 1,17         | -20,0732491        | 18,005218         | -20,0752927        |
| THR10  | -438,0663     | -438,056557    | -438,099757    | 9,3     | 9,3     | 380,6 | 0,02   | 0,01        | 0,33         | -3,56729809        | 3,09947916        | -3,56764989        |
| THR11  | -438,066114   | -438,056225    | -438,099695    | 10,2    | 9,5     | 383,0 | 0,02   | 0,01        | 0,31         | -3,34242073        | 2,92224523        | -3,34275241        |
| THR12  | -438,06512    | -438,055121    | -438,098922    | 13,1    | 11,5    | 385,9 | 0,01   | 0,00        | 0,16         | -1,48421824        | 1,30752134        | -1,48436664        |
|        |               |                |                |         |         |       |        | <b>1,00</b> | <b>14,87</b> | <b>-438,059013</b> | <b>384,326859</b> | <b>-438,102635</b> |
| THR+1  | -438,417594   | -438,407612    | -438,451113    | 0,0     | 0,0     | 383,4 | 1,00   | 0,61        | 2,50         | -268,272842        | 234,619071        | -268,299472        |
| THR+2  | -438,416801   | -438,406704    | -438,45068     | 2,4     | 1,2     | 387,4 | 0,62   | 0,38        | 3,06         | -167,237082        | 147,797428        | -167,253857        |
| THR+3  | -438,411804   | -438,401495    | -438,446261    | 16,1    | 12,8    | 394,4 | 0,01   | 0,00        | 0,17         | -1,61375986        | 1,45181384        | -1,61392465        |
| THR+4  | -438,412113   | -438,401911    | -438,446043    | 15,0    | 13,4    | 388,8 | 0,00   | 0,00        | 0,14         | -1,28354287        | 1,13838014        | -1,28367208        |
|        |               |                |                |         |         |       |        | <b>1,00</b> | <b>5,87</b>  | <b>-438,407226</b> | <b>385,006693</b> | <b>-438,450926</b> |
| THR-H1 | -437,542235   | -437,532915    | -437,575155    | 0       | 0       | 372,2 | 1,00   | 0,63        | 2,42         | -275,310333        | 234,170104        | -275,336911        |
| THR-H2 | -437,541032   | -437,531571    | -437,574487    | 3,5     | 1,8     | 378,1 | 0,50   | 0,31        | 3,02         | -136,50514         | 117,965389        | -136,51853         |
| THR-H3 | -437,539276   | -437,529879    | -437,572849    | 8,0     | 6,1     | 378,6 | 0,09   | 0,06        | 1,34         | -24,4377925        | 21,1453738        | -24,4401925        |
| THR-H4 | -437,536701   | -437,52729     | -437,57004     | 14,8    | 13,4    | 376,6 | 0,00   | 0,00        | 0,14         | -1,27904421        | 1,1010633         | -1,27916918        |
|        |               |                |                |         |         |       |        | <b>1,00</b> | <b>6,93</b>  | <b>-437,53231</b>  | <b>374,381931</b> | <b>-437,574803</b> |

## L-Cysteine

Figure S10. Relative  $H^{\circ}_{298}$  and  $G^{\circ}_{298}$  ( $\text{kJ mol}^{-1}$ ) of the eight most stable conformers of neutral L-cysteine.

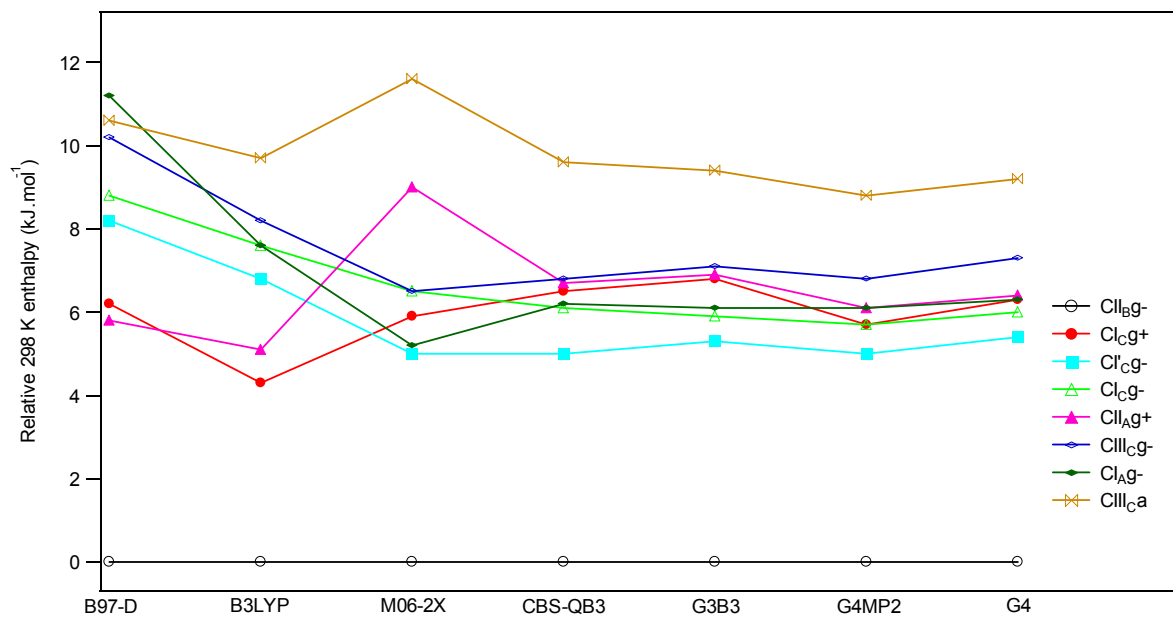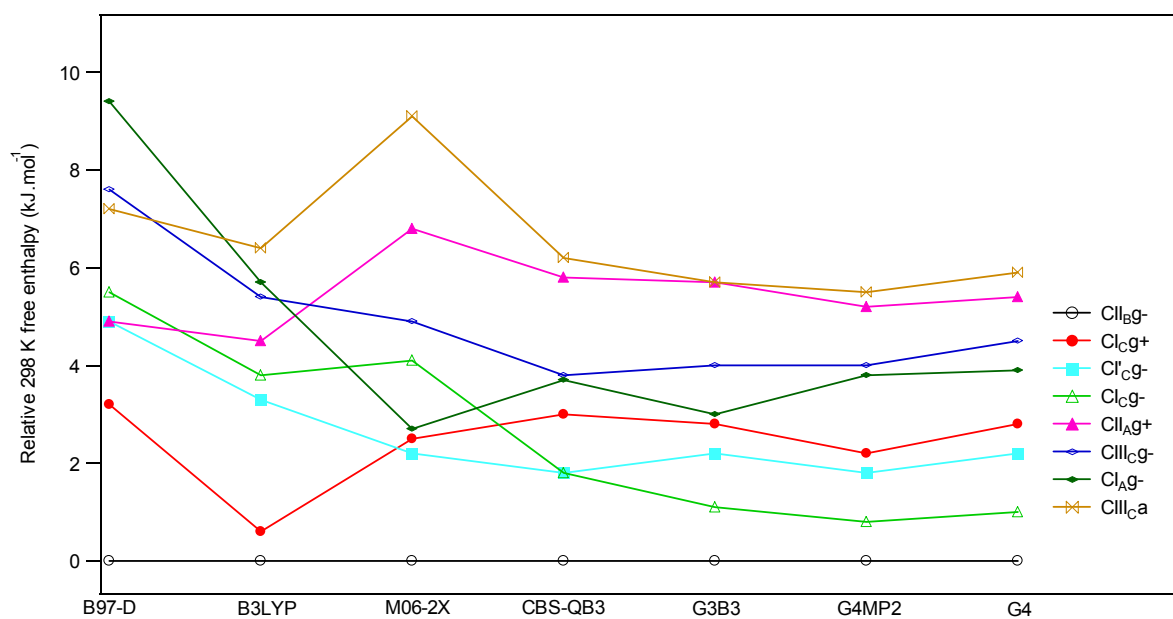

Figure S11 Relative  $H^{\circ}_{298}$  and  $G^{\circ}_{298}$  ( $\text{kJ mol}^{-1}$ ) of the five most stable conformers of deprotonated L-cysteine.

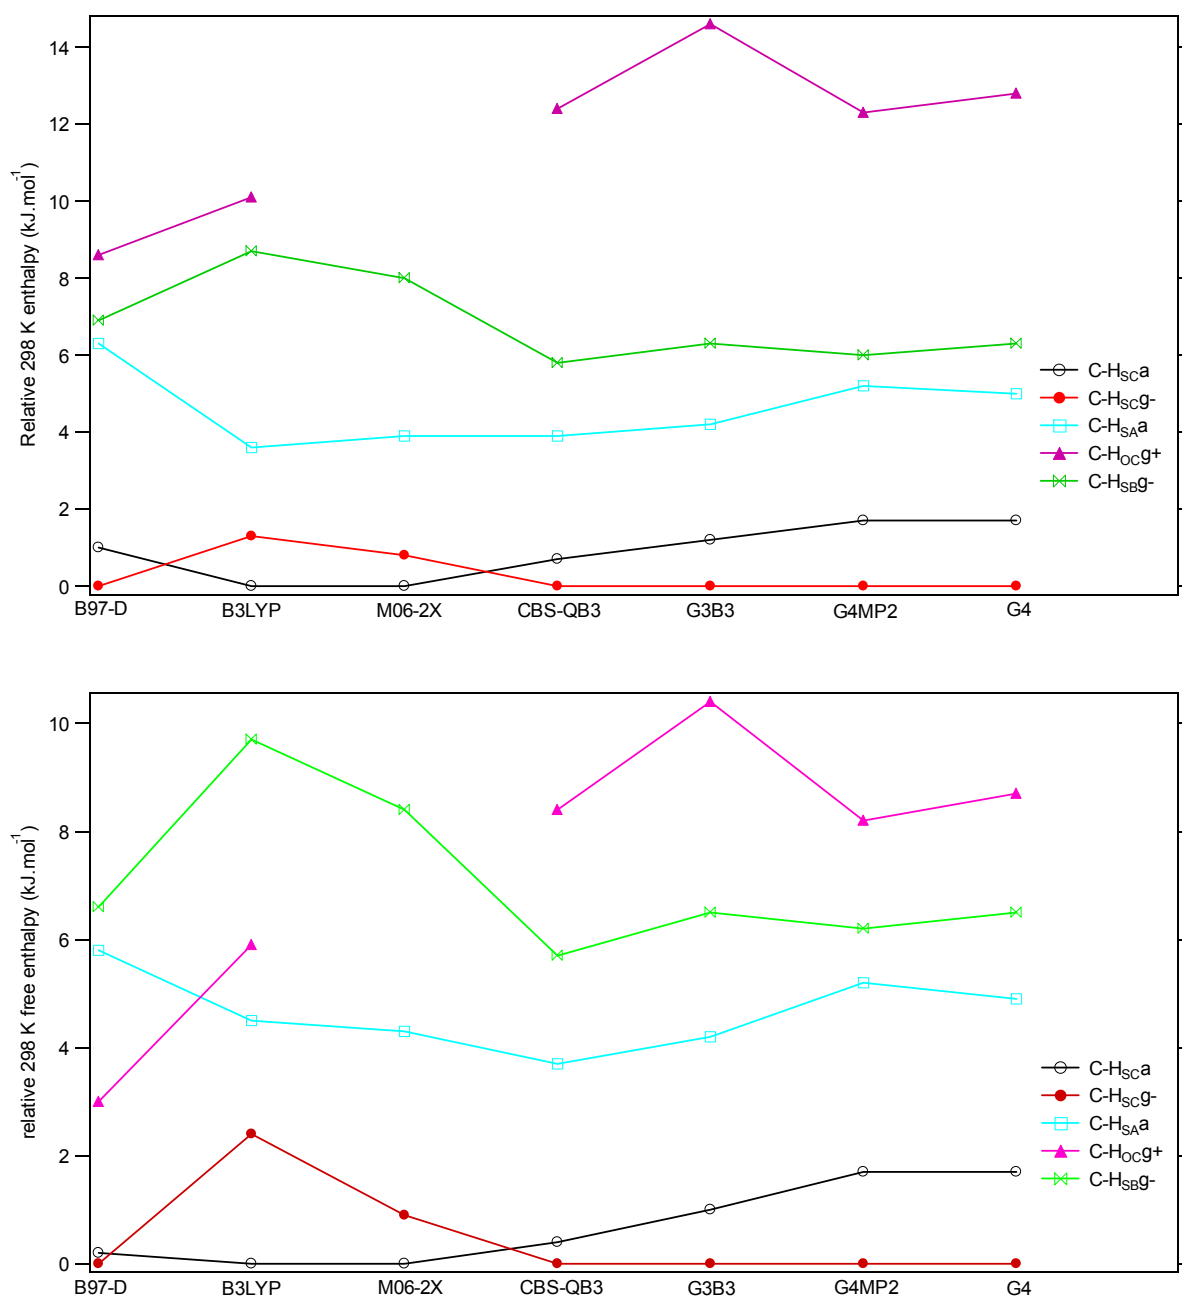

Figure S12 Relative  $H^{\circ}_{298}$  and  $G^{\circ}_{298}$  ( $\text{kJ mol}^{-1}$ ) of the six most stable conformers of protonated L-cysteine.

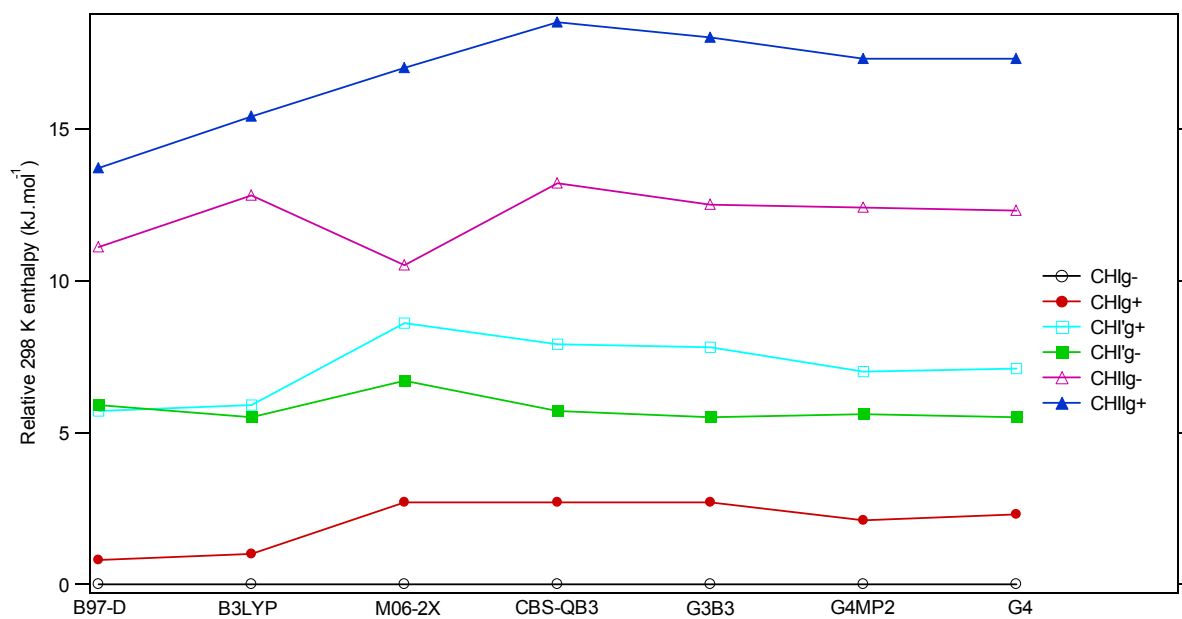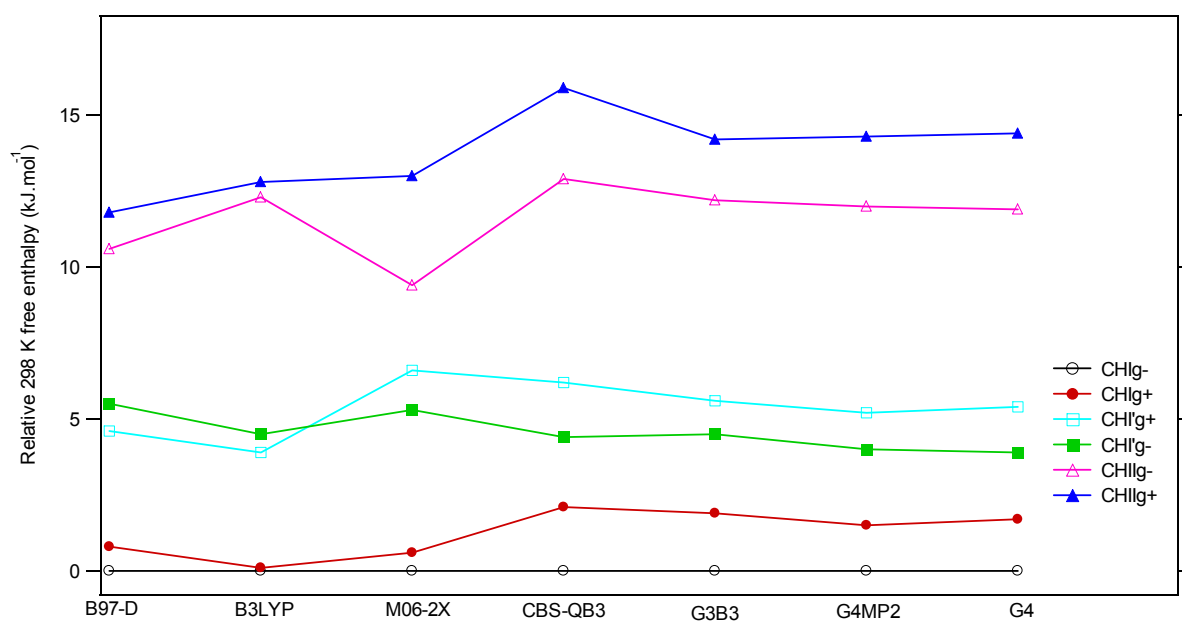

Figure S13. Optimized B3LYP/6-31+G(d,p) geometries of the first thirteen conformers of neutral L-cysteine (into brackets, relative  $H^{\circ}_{298}$  and  $G^{\circ}_{298}$  in  $\text{kJ mol}^{-1}$  calculated).

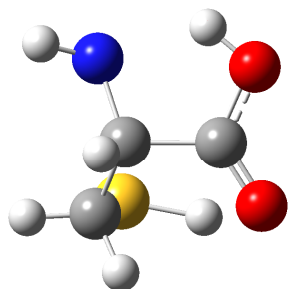

CYS1 [0.0; 0.0]

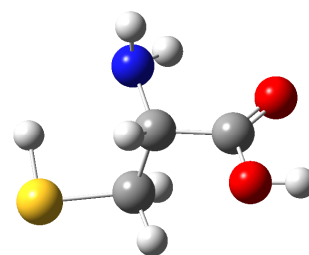

CYS2 [4.3; 0.6]

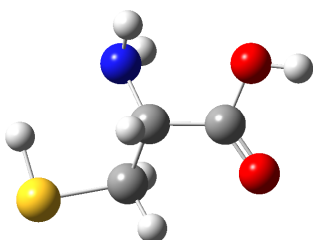

CYS3 [11.1; 3.1]

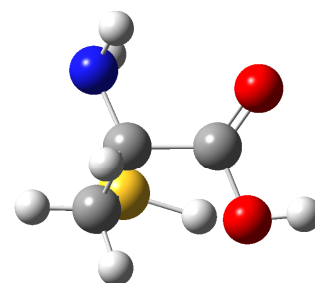

CYS4 [6.8; 3.3]

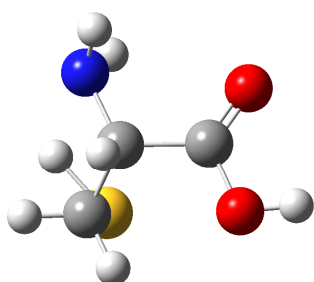

CYS5 [7.6; 3.8]

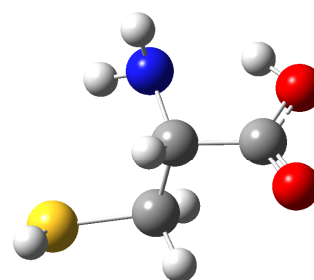

CYS6 [5.1; 4.5]

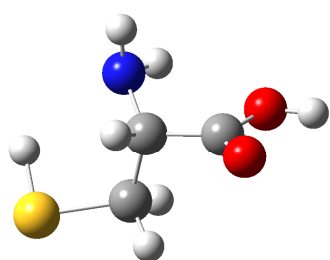

CYS7 [10.0; 4.8]

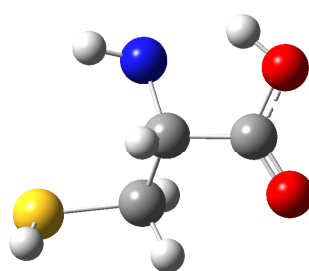

CYS8 [6.8; 5.0]

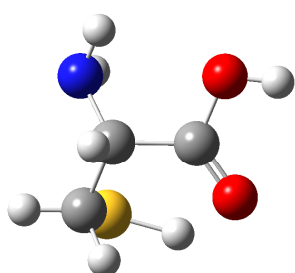

CYS9 [8.2; 5.4]

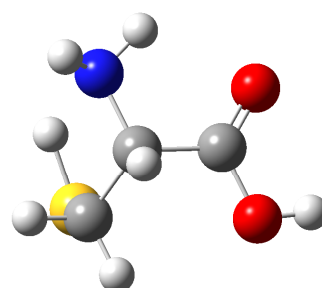

CYS10 [7.6; 5.7]

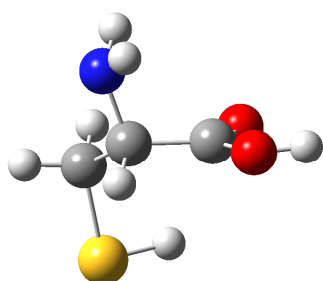

CYS11 [9.7; 6.4]

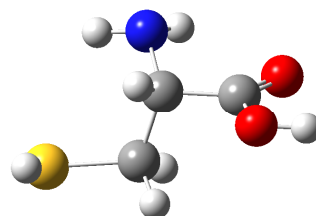

CYS12 [9.9; 6.7]

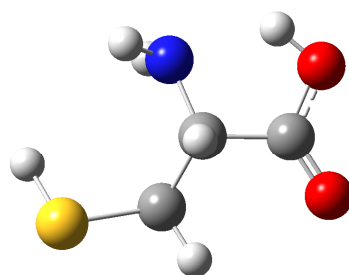

CYS13 [8.1; 6.8]

Figure S14. Optimized B3LYP/6-31+G(d,p) geometries of the first eight conformers of deprotonated L-cysteine (into brackets, relative  $H^{\circ}_{298}$  and  $G^{\circ}_{298}$  in  $\text{kJ mol}^{-1}$  calculated).

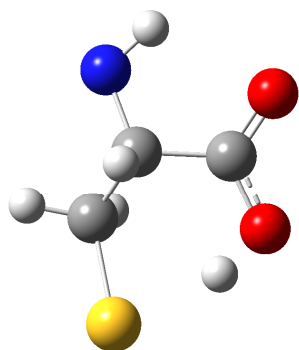

CYS-H1 [0.0; 0.0]

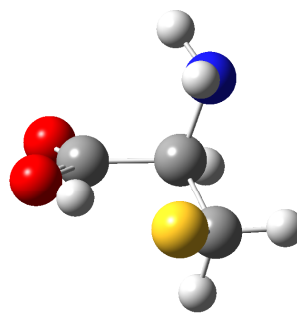

CYS-H2 [1.3; 2.4]

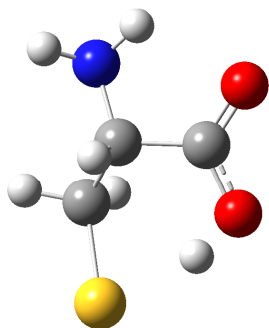

CYS-H3 [3.6; 4.5]

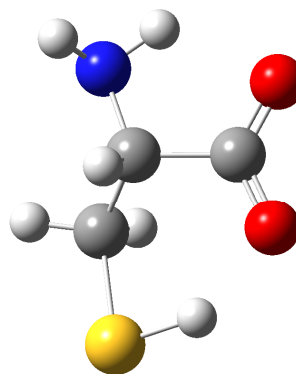

CYS-H4 [8.4; 4.8]

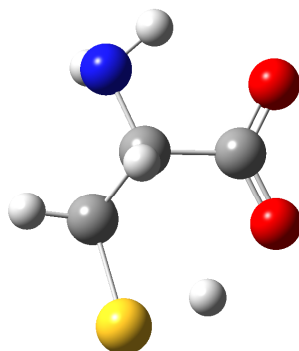

CYS-H5 [8.1; 4.9]

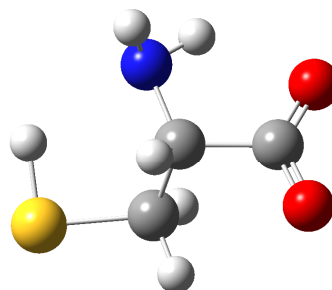

CYS-H6 [10.1; 5.9]



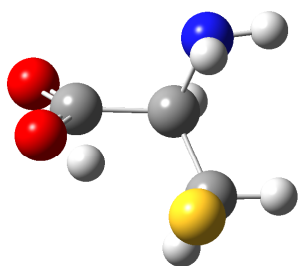

CYS-H7 [8.7; 9.7]

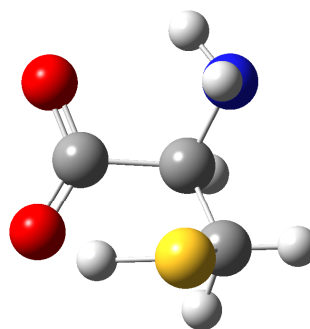

CYS-H8 [ $1\Delta G = 11.1 \text{ kJ.mol}^{-1}$ ]

Figure S15. Optimized B3LYP/6-31+G(d,p) geometries of the first six conformers of protonated L-cysteine (into brackets, relative  $H^{\circ}_{298}$  and  $G^{\circ}_{298}$  in  $\text{kJ mol}^{-1}$  calculated).

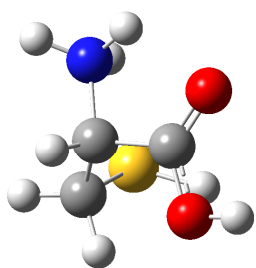

CYSH+1 [0.0; 0.0]

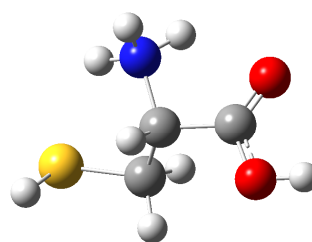

CYSH+2 [1.0; 0.1]

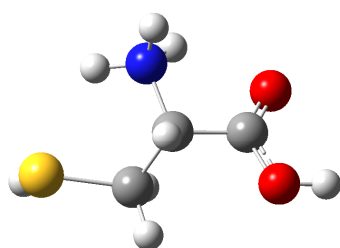

CYSH+3 [5.9; 3.9]

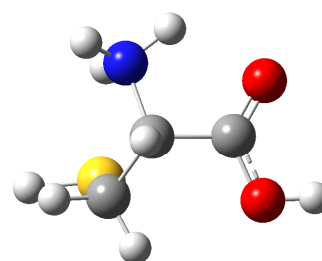

CYSH+4 [5.5; 4.5]

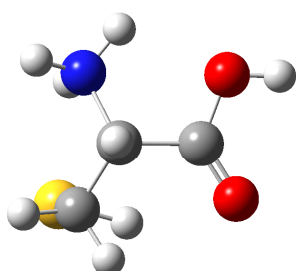

CYSH+5 [12.8; 12.3]

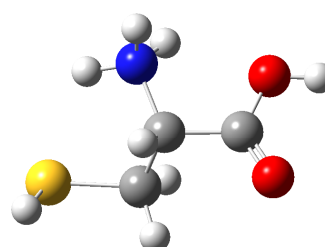

CYSH+6 [15.4; 12.8]

Table T3. Relative energies calculated with Composite methods and DFT for different forms of L-cysteine.  
**B97D/6-31+G(d,p)**

| Files         | H(0K/hartree)      | H(298/hartree)     | G(298/hartree)     | delta H     | delta G    | S            | xibrut      | xinorm      | Smix         | Hi                 | Si                | Gi                 |
|---------------|--------------------|--------------------|--------------------|-------------|------------|--------------|-------------|-------------|--------------|--------------------|-------------------|--------------------|
| CYS1          | -721,648419        | -721,639517        | -721,681271        | 0,0         | 0,0        | 367,9        | 1,00        | 0,49        | 2,90         | -355,186963        | 181,063352        | -355,207514        |
| CYS2          | -721,646466        | -721,637169        | -721,680043        | 6,2         | 3,2        | 377,7        | 0,28        | 0,14        | 2,25         | -97,806932         | 51,1965274        | -97,8127429        |
| <b>CYS3</b>   | <b>-721,64442</b>  | <b>-721,635107</b> | <b>-721,678339</b> | <b>11,6</b> | <b>7,7</b> | <b>380,9</b> | <b>0,05</b> | <b>0,02</b> | <b>0,71</b>  | <b>-16,3373157</b> | <b>8,62311412</b> | <b>-16,3382944</b> |
| CYS4          | -721,645697        | -721,63641         | -721,679423        | 8,2         | 4,9        | 379,0        | 0,14        | 0,07        | 1,56         | -51,0022833        | 26,7834596        | -51,0053233        |
| CYS5          | -721,645544        | -721,636173        | -721,679186        | 8,8         | 5,5        | 379,0        | 0,11        | 0,06        | 1,33         | -39,7644252        | 20,8819911        | -39,7667954        |
| CYS6          | -721,646359        | -721,637313        | -721,67939         | 5,8         | 4,9        | 370,7        | 0,14        | 0,07        | 1,52         | -49,2650573        | 25,3081581        | -49,2679299        |
| CYS8          | -721,645645        | -721,636435        | -721,679017        | 8,1         | 5,9        | 375,2        | 0,09        | 0,05        | 1,18         | -33,2977303        | 17,3108341        | -33,2996952        |
| CYS9          | -721,644747        | -721,635623        | -721,678375        | 10,2        | 7,6        | 376,7        | 0,05        | 0,02        | 0,73         | -16,9668207        | 8,85594072        | -16,9678258        |
| CYS10         | -721,644489        | -721,635254        | -721,677691        | 11,2        | 9,4        | 373,9        | 0,02        | 0,01        | 0,43         | -8,2723812         | 4,2860105         | -8,27286768        |
| CYS11         | -721,644839        | -721,635463        | -721,678532        | 10,6        | 7,2        | 379,5        | 0,06        | 0,03        | 0,83         | -20,008174         | 10,5208332        | -20,0093681        |
| CYS12         | -721,644143        | -721,634867        | -721,677651        | 12,2        | 9,5        | 376,9        | 0,02        | 0,01        | 0,41         | -7,93206864        | 4,14329732        | -7,93253891        |
| CYS13         | -721,645384        | -721,636166        | -721,678774        | 8,8         | 6,6        | 375,4        | 0,07        | 0,04        | 0,99         | -25,797827         | 13,4199761        | -25,7993502        |
| <b>CYS7</b>   | <b>-721,64442</b>  | <b>-721,635108</b> | <b>-721,678336</b> | <b>11,6</b> | <b>7,7</b> |              |             | <b>1,00</b> | <b>14,84</b> | <b>-721,637979</b> | <b>372,393494</b> | <b>-721,680246</b> |
| CYSH+1        | -721,994241        | -721,985014        | -722,027646        | 0,0         | 0,0        | 375,6        | 1,00        | 0,49        | 2,90         | -355,904541        | 185,155583        | -355,925557        |
| CYSH+2        | -721,993966        | -721,984695        | -722,027355        | 0,8         | 0,8        | 375,9        | 0,74        | 0,36        | 3,06         | -262,185931        | 136,48911         | -262,201422        |
| CYSH+3        | -721,992261        | -721,98284         | -722,025891        | 5,7         | 4,6        | 379,3        | 0,16        | 0,08        | 1,66         | -56,3486646        | 29,603002         | -56,3520246        |
| CYSH+4        | -721,992095        | -721,982761        | -722,025549        | 5,9         | 5,5        | 377,0        | 0,11        | 0,05        | 1,32         | -39,3458314        | 20,5442194        | -39,3481632        |
| CYSH+5        | -721,990021        | -721,980786        | -722,023592        | 11,1        | 10,6       | 377,1        | 0,01        | 0,01        | 0,29         | -5,03868884        | 2,63203891        | -5,03898758        |
| CYSH+6        | -721,989184        | -721,979788        | -722,023148        | 13,7        | 11,8       | 382,0        | 0,01        | 0,00        | 0,20         | -3,16089658        | 1,67251599        | -3,16108641        |
| <b>CYS-H1</b> | <b>-721,118814</b> | <b>-721,110439</b> | <b>-721,151036</b> | <b>1,0</b>  | <b>0,2</b> |              |             | <b>0,38</b> | <b>3,06</b>  | <b>-270,850003</b> | <b>134,343532</b> | <b>-270,865252</b> |
| CYS-H2        | -721,119043        | -721,110814        | -721,151123        | 0,0         | 0,0        | 355,1        | 1,00        | 0,41        | 3,04         | -296,762779        | 146,152148        | -296,779367        |
| CYS-H3        | -721,116758        | -721,108398        | -721,148898        | 6,3         | 5,8        | 356,8        | 0,10        | 0,04        | 1,07         | -28,680996         | 14,1920279        | -28,6826069        |
| CYS-H6        | -721,11662         | -721,107543        | -721,149997        | 8,6         | 3,0        | 374,0        | 0,31        | 0,13        | 2,17         | -90,9585           | 47,1799662        | -90,963855         |
| CYS-H7        | -721,116516        | -721,108178        | -721,1486          | 6,9         | 6,6        | 356,1        | 0,07        | 0,03        | 0,86         | -20,9738168        | 10,3583506        | -20,9749925        |
| CYS-H8        | -721,115212        | -721,106483        | -721,148136        | 11,4        | 7,8        | 367,0        | 0,04        | 0,02        | 0,60         | -12,8839157        | 6,5567786         | -12,8846599        |
| <b>CYS-H4</b> | <b>-721,118808</b> | <b>-721,110435</b> | <b>-721,151027</b> | <b>1,0</b>  | <b>0,3</b> |              |             | <b>1,00</b> | <b>10,79</b> | <b>-721,11001</b>  | <b>358,782804</b> | <b>-721,150733</b> |
| CYS-H5        | -721,118825        | -721,110454        | -721,151041        | 0,9         | 0,2        |              |             |             |              |                    |                   |                    |

**B3LYP/6-31+G(d,p)**

| Files         | H(0K/hartree) | H(298/hartree) | G(298/hartree) | delta H | delta G | S     | xibrut | xinorm      | Smix         | Hi                 | Si                | Gi                 |
|---------------|---------------|----------------|----------------|---------|---------|-------|--------|-------------|--------------|--------------------|-------------------|--------------------|
| <b>CYS1</b>   | -721,855249   | -721,846482    | -721,888083    | 0,0     | 0,0     | 366,5 | 1,00   | 0,29        | 2,99         | -209,864661        | 106,559948        | -209,876756        |
| <b>CYS2</b>   | -721,854145   | -721,844852    | -721,887852    | 4,3     | 0,6     | 378,8 | 0,78   | 0,23        | 2,80         | -164,656979        | 86,4172604        | -164,666788        |
| <b>CYS3</b>   | -721,851521   | -721,842245    | -721,886918    | 11,1    | 3,1     | 393,6 | 0,29   | 0,09        | 1,75         | -61,742591         | 33,6653731        | -61,7464121        |
| <b>CYS4</b>   | -721,85313    | -721,84388     | -721,886835    | 6,8     | 3,3     | 378,5 | 0,27   | 0,08        | 1,66         | -56,5887187        | 29,6685324        | -56,5920861        |
| <b>CYS5</b>   | -721,852893   | -721,843592    | -721,886641    | 7,6     | 3,8     | 379,3 | 0,22   | 0,06        | 1,46         | -46,1580072        | 24,2528495        | -46,16076          |
| <b>CYS6</b>   | -721,85341    | -721,844521    | -721,886352    | 5,1     | 4,5     | 368,5 | 0,16   | 0,05        | 1,20         | -34,0749986        | 17,3974737        | -34,0769733        |
| <b>CYS7</b>   | -721,851985   | -721,842656    | -721,886243    | 10,0    | 4,8     | 384,0 | 0,14   | 0,04        | 1,11         | -30,389269         | 16,1670376        | -30,391104         |
| <b>CYS8</b>   | -721,852914   | -721,843879    | -721,886163    | 6,8     | 5,0     | 372,5 | 0,13   | 0,04        | 1,05         | -27,9404441        | 14,4198867        | -27,9420808        |
| <b>CYS9</b>   | -721,852445   | -721,843345    | -721,886016    | 8,2     | 5,4     | 375,9 | 0,11   | 0,03        | 0,94         | -23,9434574        | 12,4701732        | -23,9448728        |
| <b>CYS10</b>  | -721,852756   | -721,843605    | -721,885919    | 7,6     | 5,7     | 372,8 | 0,10   | 0,03        | 0,87         | -21,6244813        | 11,1681806        | -21,6257489        |
| <b>CYS11</b>  | -721,852041   | -721,842792    | -721,885645    | 9,7     | 6,4     | 377,6 | 0,08   | 0,02        | 0,71         | -16,2171633        | 8,48221456        | -16,218126         |
| <b>CYS12</b>  | -721,851952   | -721,842699    | -721,885544    | 9,9     | 6,7     | 377,5 | 0,07   | 0,02        | 0,66         | -14,5850906        | 7,62715317        | -14,5859563        |
| <b>CYS13</b>  | -721,852393   | -721,84341     | -721,885509    | 8,1     | 6,8     | 370,9 | 0,07   | 0,02        | 0,64         | -14,0587334        | 7,22388358        | -14,0595533        |
|               |               |                |                |         |         |       |        | <b>1,00</b> | <b>17,83</b> | <b>-721,844595</b> | <b>375,519966</b> | <b>-721,887218</b> |
| <b>CYSH+1</b> | -722,197086   | -722,18818     | -722,23003     | 0,0     | 0,0     | 368,7 | 1,00   | 0,43        | 3,02         | -307,190674        | 156,837125        | -307,208475        |
| <b>CYSH+2</b> | -722,196881   | -722,187818    | -722,229996    | 1,0     | 0,1     | 371,6 | 0,96   | 0,41        | 3,04         | -296,415249        | 152,521871        | -296,432561        |
| <b>CYSH+3</b> | -722,195165   | -722,18594     | -722,22854     | 5,9     | 3,9     | 375,3 | 0,21   | 0,09        | 1,79         | -64,2426641        | 33,3871902        | -64,2464536        |
| <b>CYSH+4</b> | -722,195148   | -722,186078    | -722,228307    | 5,5     | 4,5     | 372,1 | 0,16   | 0,07        | 1,54         | -50,2982926        | 25,9125818        | -50,3012337        |
| <b>CYSH+5</b> | -722,192255   | -722,18329     | -722,225334    | 12,8    | 12,3    | 370,4 | 0,01   | 0,00        | 0,15         | -2,21604189        | 1,13665932        | -2,2161709         |
| <b>CYSH+6</b> | -722,191487   | -722,182297    | -722,225149    | 15,4    | 12,8    | 377,5 | 0,01   | 0,00        | 0,13         | -1,82473413        | 0,95393682        | -1,82484241        |
|               |               |                |                |         |         |       |        | <b>1,00</b> | <b>9,67</b>  | <b>-722,187656</b> | <b>370,749364</b> | <b>-722,229737</b> |
| <b>CYS-H1</b> | -721,329894   | -721,321579    | -721,362098    | 0,0     | 0,0     | 357,0 | 1,00   | 0,51        | 2,85         | -369,203816        | 182,722376        | -369,224555        |
| <b>CYS-H2</b> | -721,329186   | -721,321072    | -721,361166    | 1,3     | 2,4     | 353,2 | 0,38   | 0,19        | 2,64         | -138,734459        | 67,9408332        | -138,74217         |
| <b>CYS-H3</b> | -721,328399   | -721,320196    | -721,36039     | 3,6     | 4,5     | 354,1 | 0,17   | 0,09        | 1,74         | -61,412004         | 30,1496423        | -61,4154261        |
| <b>CYS-H4</b> | -721,326994   | -721,318368    | -721,36026     | 8,4     | 4,8     | 369,1 | 0,15   | 0,07        | 1,61         | -53,5746917        | 27,4131879        | -53,5778032        |
| <b>CYS-H5</b> | -721,327172   | -721,318501    | -721,36022     | 8,1     | 4,9     | 367,6 | 0,14   | 0,07        | 1,56         | -51,3707514        | 26,1769169        | -51,3737225        |
| <b>CYS-H6</b> | -721,326619   | -721,317733    | -721,359859    | 10,1    | 5,9     | 371,1 | 0,10   | 0,05        | 1,22         | -35,1612881        | 18,0918988        | -35,1633415        |
| <b>CYS-H7</b> | -721,326451   | -721,318251    | -721,358401    | 8,7     | 9,7     | 353,7 | 0,02   | 0,01        | 0,40         | -7,60461139        | 3,72933513        | -7,60503467        |
| <b>CYS-H8</b> | -721,325503   | -721,316401    | -721,357849    | 13,6    | 11,2    | 365,2 | 0,01   | 0,01        | 0,25         | -4,25903181        | 2,15617703        | -4,25927654        |
|               |               |                |                |         |         |       |        | <b>1,00</b> | <b>12,28</b> | <b>-721,320653</b> | <b>358,380367</b> | <b>-721,36133</b>  |

| Files                     | H(0K/hartree)      | H(298/hartree)     | G(298/hartree)     | delta H     | delta G     | S     | xibrut      | xinorm      | Smix         | Hi                 | Si                | Gi                 |
|---------------------------|--------------------|--------------------|--------------------|-------------|-------------|-------|-------------|-------------|--------------|--------------------|-------------------|--------------------|
| <b>M06-2X/6-31+G(d,p)</b> |                    |                    |                    |             |             |       |             |             |              |                    |                   |                    |
| CYS1                      | -721,675673        | -721,66711         | -721,708162        | 0,0         | 0,0         | 361,7 | 1,00        | 0,35        | 3,05         | -251,039958        | 125,816042        | -251,054238        |
| CYS2                      | -721,673874        | -721,664865        | -721,707198        | 5,9         | 2,5         | 373,0 | 0,36        | 0,13        | 2,17         | -91,214713         | 47,1415805        | -91,2200636        |
| CYS3                      | -721,671536        | -721,662545        | -721,705311        | 12,0        | 7,5         | 376,8 | 0,05        | 0,02        | 0,59         | -12,5721694        | 6,56402838        | -12,5729145        |
| CYS4                      | -721,674237        | -721,665206        | -721,707307        | 5,0         | 2,2         | 370,9 | 0,41        | 0,14        | 2,30         | -102,277375        | 52,5692735        | -102,283341        |
| CYS5                      | -721,673568        | -721,664619        | -721,706615        | 6,5         | 4,1         | 370,0 | 0,20        | 0,07        | 1,53         | -49,4493676        | 25,35298          | -49,4522452        |
| CYS6                      | -721,672541        | -721,663687        | -721,705578        | 9,0         | 6,8         | 369,1 | 0,07        | 0,02        | 0,72         | -16,6413503        | 8,51079628        | -16,6423163        |
| CYS7                      | -721,671839        | -721,662651        | -721,706099        | 11,7        | 5,4         | 382,8 | 0,11        | 0,04        | 1,07         | -28,7616627        | 15,2561625        | -28,7633943        |
| CYS8                      | -721,671888        | -721,663134        | -721,704761        | 10,4        | 8,9         | 366,8 | 0,03        | 0,01        | 0,38         | -7,05598654        | 3,58586632        | -7,05639355        |
| CYS9                      | -721,67342         | -721,664626        | -721,706307        | 6,5         | 4,9         | 367,2 | 0,14        | 0,05        | 1,24         | -35,7835281        | 18,2088127        | -35,7855949        |
| CYS10                     | -721,674162        | -721,665116        | -721,707121        | 5,2         | 2,7         | 370,1 | 0,34        | 0,12        | 2,08         | -84,1289851        | 43,1426368        | -84,1338819        |
| CYS11                     | -721,671623        | -721,66268         | -721,704696        | 11,6        | 9,1         | 370,2 | 0,03        | 0,01        | 0,36         | -6,59039168        | 3,38055061        | -6,59077538        |
| CYS12                     | -721,671349        | -721,662248        | -721,704621        | 12,8        | 9,3         | 373,3 | 0,02        | 0,01        | 0,34         | -6,09121265        | 3,15104602        | -6,0915703         |
| CYS13                     | -721,672295        | -721,663145        | -721,706141        | 10,4        | 5,3         | 378,8 | 0,12        | 0,04        | 1,10         | -30,0587087        | 15,7782781        | -30,0604996        |
|                           |                    |                    |                    |             |             |       | <b>1,00</b> | <b>1,00</b> | <b>16,92</b> | <b>-721,665408</b> | <b>368,458054</b> | <b>-721,707229</b> |
| CYSH+1                    | -722,014026        | -722,00522         | -722,046734        | 0,0         | 0,0         | 365,8 | 1,00        | 0,50        | 2,89         | -357,735034        | 181,222232        | -357,755603        |
| CYSH+2                    | -722,013279        | -722,004177        | -722,046517        | 2,7         | 0,6         | 373,0 | 0,80        | 0,39        | 3,05         | -284,831489        | 147,161736        | -284,848192        |
| CYSH+3                    | -722,011027        | -722,001952        | -722,044211        | 8,6         | 6,6         | 372,3 | 0,07        | 0,04        | 0,98         | -25,2830309        | 13,0378427        | -25,2845108        |
| CYSH+4                    | -722,011648        | -722,002671        | -722,044733        | 6,7         | 5,3         | 370,6 | 0,12        | 0,06        | 1,41         | -43,7433172        | 22,4521837        | -43,7458656        |
| CYSH+5                    | -722,010153        | -722,001224        | -722,043169        | 10,5        | 9,4         | 369,6 | 0,02        | 0,01        | 0,43         | -8,46401839        | 4,33226109        | -8,46451011        |
| CYSH+6                    | -722,007886        | -721,998738        | -722,04177         | 17,0        | 13,0        | 379,1 | 0,01        | 0,00        | 0,13         | -1,94758629        | 1,02269836        | -1,94770237        |
|                           |                    |                    |                    |             |             |       | <b>1,00</b> | <b>1,00</b> | <b>8,90</b>  | <b>-722,004475</b> | <b>369,228954</b> | <b>-722,046384</b> |
| CYS-H1                    | <b>-721,152353</b> | <b>-721,144177</b> | <b>-721,184374</b> | <b>0,0</b>  | <b>0,0</b>  | 354,2 | 1,00        | 0,52        | 2,83         | -373,917083        | 183,629566        | -373,937926        |
| CYS-H2                    | -721,151981        | -721,143891        | -721,18405         | 0,8         | 0,9         | 353,8 | 0,71        | 0,37        | 3,06         | -266,072512        | 130,543944        | -266,087329        |
| CYS-H3                    | -721,150813        | -721,142702        | -721,182744        | 3,9         | 4,3         | 352,8 | 0,18        | 0,09        | 1,84         | -67,5052941        | 33,0238833        | -67,5090424        |
| CYS-H4                    | -721,144617        | -721,136015        | -721,177642        | 21,4        | 17,7        | 366,8 | 0,00        | 0,00        | 0,03         | -0,31793013        | 0,16169082        | -0,31794848        |
| CYS-H7                    | -721,149268        | -721,141135        | -721,181185        | 8,0         | 8,4         | 352,9 | 0,04        | 0,02        | 0,61         | -13,1305563        | 6,42482251        | -13,1312855        |
| CYS-H8                    | -721,144942        | -721,136545        | -721,177203        | 20,0        | 18,8        | 358,2 | 0,00        | 0,00        | 0,02         | -0,20049605        | 0,09959329        | -0,20050736        |
| CYS-H5                    | <b>-721,152363</b> | <b>-721,144183</b> | <b>-721,184391</b> | <b>0,0</b>  | <b>0,0</b>  |       |             | <b>1,00</b> | <b>8,39</b>  | <b>-721,143872</b> | <b>353,8835</b>   | <b>-721,184039</b> |
| E-T                       |                    |                    |                    |             |             |       |             |             |              |                    |                   |                    |
| CYS-H6                    | <b>-721,145442</b> | <b>-721,137264</b> | <b>-721,177511</b> | <b>18,2</b> | <b>18,0</b> |       |             |             |              |                    |                   |                    |

**CBS-QB3**

| Files         | H(0K/hartree)      | H(298/hartree)     | G(298/hartree)     | delta H    | delta G    | S     | xibrut | xinorm      | Smix         | Hi                 | Si                | Gi                 |
|---------------|--------------------|--------------------|--------------------|------------|------------|-------|--------|-------------|--------------|--------------------|-------------------|--------------------|
| <b>CYS1</b>   | -721,013562        | -721,004788        | -721,046326        | 0,0        | 0,0        | 366,0 | 1,00   | 0,32        | 3,03         | -230,532477        | 117,013322        | -230,545758        |
| <b>CYS2</b>   | -721,011583        | -721,002299        | -721,045182        | 6,5        | 3,0        | 377,8 | 0,30   | 0,10        | 1,87         | -69,3356704        | 36,3329774        | -69,3397943        |
| <b>CYS3</b>   | -721,00891         | -720,999615        | -721,043356        | 13,6       | 7,8        | 385,4 | 0,04   | 0,01        | 0,50         | -10,1888153        | 5,44594338        | -10,1894334        |
| <b>CYS4</b>   | -721,012116        | -721,002867        | -721,045632        | 5,0        | 1,8        | 376,8 | 0,48   | 0,15        | 2,40         | -111,224456        | 58,1229346        | -111,231053        |
| <b>CYS5</b>   | -721,011833        | -721,00247         | -721,04563         | 6,1        | 1,8        | 380,3 | 0,48   | 0,15        | 2,40         | -110,991024        | 58,5367089        | -110,997668        |
| <b>CYS6</b>   | -721,011159        | -721,002248        | -721,044108        | 6,7        | 5,8        | 368,8 | 0,10   | 0,03        | 0,90         | -22,4444783        | 11,480687         | -22,4457814        |
| <b>CYS7</b>   | -721,008888        | -720,999597        | -721,043283        | 13,6       | 8,0        | 384,9 | 0,04   | 0,01        | 0,47         | -9,43688504        | 5,03769282        | -9,43745683        |
| <b>CYS8</b>   | -721,010266        | -721,001197        | -721,043485        | 9,4        | 7,5        | 372,6 | 0,05   | 0,02        | 0,55         | -11,6670493        | 6,02889822        | -11,6677336        |
| <b>CYS9</b>   | -721,011343        | -721,00221         | -721,044875        | 6,8        | 3,8        | 375,9 | 0,22   | 0,07        | 1,54         | -50,2267612        | 26,1858145        | -50,2297333        |
| <b>CYS10</b>  | -721,011639        | -721,002435        | -721,044935        | 6,2        | 3,7        | 374,4 | 0,23   | 0,07        | 1,60         | -53,4935073        | 27,7810739        | -53,4966605        |
| <b>CYS11</b>  | -721,01039         | -721,001129        | -721,043946        | 9,6        | 6,2        | 377,2 | 0,08   | 0,03        | 0,79         | -18,9330804        | 9,90597727        | -18,9342047        |
| <b>CYS12</b>  | -721,010245        | -721,000965        | -721,043797        | 10,0       | 6,6        | 377,4 | 0,07   | 0,02        | 0,71         | -16,1905971        | 8,47405215        | -16,1915589        |
| <b>CYS13</b>  | -721,009827        | -721,000818        | -721,042904        | 10,4       | 9,0        | 370,8 | 0,03   | 0,01        | 0,35         | -6,33824455        | 3,25961752        | -6,33861452        |
|               |                    |                    |                    |            |            |       |        | <b>1,00</b> | <b>17,12</b> | <b>-721,003046</b> | <b>373,6057</b>   | <b>-721,045451</b> |
| <b>CYSH+1</b> | -721,354834        | -721,345907        | -721,387783        | 0,0        | 0,0        | 368,9 | 1,00   | 0,59        | 2,59         | -426,115025        | 217,943653        | -426,139762        |
| <b>CYSH+2</b> | -721,353927        | -721,344869        | -721,386973        | 2,7        | 2,1        | 371,0 | 0,43   | 0,25        | 2,89         | -182,007134        | 93,5975712        | -182,017757        |
| <b>CYSH+3</b> | -721,352123        | -721,342905        | -721,385422        | 7,9        | 6,2        | 374,6 | 0,08   | 0,05        | 1,24         | -35,7011521        | 18,5395351        | -35,7032564        |
| <b>CYSH+4</b> | -721,352855        | -721,343738        | -721,386121        | 5,7        | 4,4        | 373,4 | 0,17   | 0,10        | 1,95         | -74,3864585        | 38,5069454        | -74,3908291        |
| <b>CYSH+5</b> | -721,349847        | -721,340883        | -721,382852        | 13,2       | 12,9       | 369,8 | 0,01   | 0,00        | 0,16         | -2,40167439        | 1,23111312        | -2,40181413        |
| <b>CYSH+6</b> | -721,348049        | -721,338855        | -721,381723        | 18,5       | 15,9       | 377,7 | 0,00   | 0,00        | 0,06         | -0,73380463        | 0,38421127        | -0,73384824        |
|               |                    |                    |                    |            |            |       |        | <b>1,00</b> | <b>8,88</b>  | <b>-721,345249</b> | <b>370,203029</b> | <b>-721,387268</b> |
| <b>CYS-H1</b> | <b>-720,4853</b>   | <b>-720,477011</b> | <b>-720,517404</b> | <b>0,7</b> | <b>0,4</b> | 355,9 | 0,85   | 0,37        | 3,06         | -267,583148        | 132,172316        | -267,59815         |
| <b>CYS-H2</b> | -720,485458        | -720,477278        | -720,517557        | 0,0        | 0,0        | 354,9 | 1,00   | 0,44        | 3,01         | -314,225639        | 154,773202        | -314,243206        |
| <b>CYS-H3</b> | -720,484047        | -720,475778        | -720,516136        | 3,9        | 3,7        | 355,6 | 0,22   | 0,10        | 1,89         | -70,6526092        | 34,8685763        | -70,6565669        |
| <b>CYS-H4</b> | -720,481471        | -720,472797        | -720,514857        | 11,8       | 7,1        | 370,6 | 0,06   | 0,03        | 0,78         | -18,4407908        | 9,48477385        | -18,4418674        |
| <b>CYS-H6</b> | -720,481342        | -720,472538        | -720,514356        | 12,4       | 8,4        | 368,4 | 0,03   | 0,02        | 0,53         | -10,8962048        | 5,57207357        | -10,8968372        |
| <b>CYS-H7</b> | -720,483337        | -720,475083        | -720,515369        | 5,8        | 5,7        | 354,9 | 0,10   | 0,04        | 1,14         | -31,5720008        | 15,5536759        | -31,5737661        |
| <b>CYS-H8</b> | -720,481317        | -720,47276         | -720,513949        | 11,9       | 9,5        | 362,9 | 0,02   | 0,01        | 0,38         | -7,10631234        | 3,57934642        | -7,10671861        |
|               |                    |                    |                    |            |            |       |        | <b>1,00</b> | <b>10,79</b> | <b>-720,476705</b> | <b>356,003964</b> | <b>-720,517112</b> |
| <b>CYS-H5</b> | <b>-720,485296</b> | <b>-720,477004</b> | <b>-720,517407</b> | <b>0,7</b> | <b>0,4</b> |       |        |             |              |                    |                   |                    |

**G3B3**

| Files         | H(0K/hartree) | H(298/hartree) | G(298/hartree) | delta H | delta G | S     | xibrut | xinorm | Smix | Hi          | Si         | Gi          |
|---------------|---------------|----------------|----------------|---------|---------|-------|--------|--------|------|-------------|------------|-------------|
| <b>CYS1</b>   | -721,587446   | -721,57856     | -721,620242    | 0,0     | 0,0     | 367,2 | 1,00   | 0,30   | 3,01 | -217,415569 | 110,649977 | -217,428128 |
| <b>CYS2</b>   | -721,58538    | -721,575954    | -721,619164    | 6,8     | 2,8     | 380,7 | 0,32   | 0,10   | 1,88 | -70,0837793 | 36,9756218 | -70,0879761 |
| <b>CYS3</b>   | -721,582585   | -721,573196    | -721,616988    | 14,1    | 8,5     | 385,8 | 0,03   | 0,01   | 0,38 | -7,13100623 | 3,8129487  | -7,13143901 |
| <b>CYS4</b>   | -721,585871   | -721,576529    | -721,619416    | 5,3     | 2,2     | 377,9 | 0,42   | 0,13   | 2,18 | -91,3175114 | 47,8181859 | -91,3229389 |
| <b>CYS5</b>   | -721,585786   | -721,57631     | -721,619809    | 5,9     | 1,1     | 383,2 | 0,63   | 0,19   | 2,63 | -137,974773 | 73,2811801 | -137,983091 |
| <b>CYS6</b>   | -721,584991   | -721,57595     | -721,618069    | 6,9     | 5,7     | 371,1 | 0,10   | 0,03   | 0,89 | -22,1917893 | 11,4125864 | -22,1930846 |
| <b>CYS7</b>   | -721,582586   | -721,573197    | -721,616974    | 14,1    | 8,6     | 385,7 | 0,03   | 0,01   | 0,38 | -7,02692749 | 3,75601081 | -7,0273538  |
| <b>CYS8</b>   | -721,584142   | -721,57495     | -721,61747     | 9,5     | 7,3     | 374,6 | 0,05   | 0,02   | 0,56 | -11,8301479 | 6,1418293  | -11,830845  |
| <b>CYS9</b>   | -721,58512    | -721,575859    | -721,61872     | 7,1     | 4,0     | 377,6 | 0,20   | 0,06   | 1,42 | -43,9653772 | 23,0084237 | -43,9679887 |
| <b>CYS10</b>  | -721,585606   | -721,576245    | -721,619107    | 6,1     | 3,0     | 377,6 | 0,30   | 0,09   | 1,82 | -66,0115929 | 34,5466688 | -66,015514  |
| <b>CYS11</b>  | -721,584355   | -721,574963    | -721,618079    | 9,4     | 5,7     | 379,9 | 0,10   | 0,03   | 0,90 | -22,4260449 | 11,8060727 | -22,4273849 |
| <b>CYS12</b>  | -721,583963   | -721,574561    | -721,617708    | 10,5    | 6,7     | 380,1 | 0,07   | 0,02   | 0,68 | -15,1894065 | 8,00213647 | -15,1903147 |
| <b>CYS13</b>  | -721,583866   | -721,574664    | -721,617211    | 10,2    | 8,0     | 374,9 | 0,04   | 0,01   | 0,46 | -9,01282881 | 4,68214165 | -9,01336024 |
| <b>CYSH+1</b> | -721,929307   | -721,920217    | -721,962448    | 0,0     | 0,0     | 372,1 | 1,00   | 0,57   | 2,66 | -411,970509 | 212,326425 | -411,994608 |
| <b>CYSH+2</b> | -721,928444   | -721,919181    | -721,961732    | 2,7     | 1,9     | 374,9 | 0,47   | 0,27   | 2,94 | -194,223029 | 100,8597   | -194,234476 |
| <b>CYSH+3</b> | -721,926693   | -721,917238    | -721,960323    | 7,8     | 5,6     | 379,6 | 0,11   | 0,06   | 1,42 | -44,2242216 | 23,2538379 | -44,226861  |
| <b>CYSH+4</b> | -721,927366   | -721,918106    | -721,960717    | 5,5     | 4,5     | 375,4 | 0,16   | 0,09   | 1,83 | -66,8902115 | 34,785009  | -66,8941597 |
| <b>CYSH+5</b> | -721,924609   | -721,915453    | -721,957818    | 12,5    | 12,2    | 373,3 | 0,01   | 0,00   | 0,20 | -3,18521301 | 1,64685405 | -3,18539993 |
| <b>CYSH+6</b> | -721,922826   | -721,913375    | -721,957053    | 18,0    | 14,2    | 384,8 | 0,00   | 0,00   | 0,10 | -1,42634223 | 0,7603213  | -1,42642853 |
| <b>CYS-H1</b> | -721,058367   | -721,049963    | -721,090577    | 1,2     | 1,0     | 357,8 | 0,68   | 0,34   | 3,05 | -246,492994 | 122,323738 | -246,506878 |
| <b>CYS-H2</b> | -721,058713   | -721,050406    | -721,090946    | 0,0     | 0,0     | 357,2 | 1,00   | 0,50   | 2,87 | -363,165257 | 179,894619 | -363,185676 |
| <b>CYS-H3</b> | -721,057169   | -721,048788    | -721,089364    | 4,2     | 4,2     | 357,5 | 0,19   | 0,10   | 1,87 | -68,9539811 | 34,1868971 | -68,9578614 |
| <b>CYS-H4</b> | -721,053561   | -721,044817    | -721,087293    | 14,7    | 9,6     | 374,2 | 0,02   | 0,01   | 0,41 | -7,83397179 | 4,06592267 | -7,83443328 |
| <b>CYS-H6</b> | -721,05378    | -721,04483     | -721,086984    | 14,6    | 10,4    | 371,4 | 0,02   | 0,01   | 0,32 | -5,66302302 | 2,91689375 | -5,66335409 |
| <b>CYS-H7</b> | -721,056359   | -721,048003    | -721,088475    | 6,3     | 6,5     | 356,6 | 0,07   | 0,04   | 1,03 | -27,1075003 | 13,4052747 | -27,1090218 |
| <b>CYS-H8</b> | -721,053049   | -721,044433    | -721,08591     | 15,7    | 13,2    | 365,4 | 0,01   | 0,00   | 0,13 | -1,83316229 | 0,92905619 | -1,83326774 |
| <b>CYS-H5</b> | -721,058363   | -721,049961    | -721,09057     | 1,2     | 1,0     | 365,4 | 0,01   | 1,00   | 9,67 | -721,04989  | 357,722401 | -721,090492 |

**G4MP2**

| Files  | H(0K/hartree) | H(298/hartree) | G(298/hartree) | delta H | delta G | S     | xibrut | xinorm      | Smix         | Hi                 | Si                | Gi                 |
|--------|---------------|----------------|----------------|---------|---------|-------|--------|-------------|--------------|--------------------|-------------------|--------------------|
| CYS1   | -721,113373   | -721,104536    | -721,146171    | 0,0     | 0,0     | 366,8 | 1,00   | 0,28        | 2,95         | -199,091499        | 101,276531        | -199,102994        |
| CYS2   | -721,111683   | -721,102353    | -721,14533     | 5,7     | 2,2     | 378,6 | 0,41   | 0,11        | 2,06         | -82,3141713        | 43,2224671        | -82,3190771        |
| CYS3   | -721,108755   | -721,099437    | -721,143209    | 13,4    | 7,8     | 385,6 | 0,04   | 0,01        | 0,45         | -8,87346213        | 4,74558867        | -8,87400077        |
| CYS4   | -721,111915   | -721,102621    | -721,145477    | 5,0     | 1,8     | 377,6 | 0,48   | 0,13        | 2,23         | -96,0552028        | 50,295741         | -96,0609114        |
| CYS5   | -721,111815   | -721,102365    | -721,145881    | 5,7     | 0,8     | 383,4 | 0,74   | 0,20        | 2,69         | -146,819435        | 78,0605049        | -146,828295        |
| CYS6   | -721,111171   | -721,102199    | -721,144204    | 6,1     | 5,2     | 370,1 | 0,13   | 0,03        | 0,98         | -25,229599         | 12,9482261        | -25,2310687        |
| CYS7   | -721,109432   | -721,10006     | -721,143954    | 11,8    | 5,8     | 386,7 | 0,10   | 0,03        | 0,81         | -19,403722         | 10,4061583        | -19,4049031        |
| CYS8   | -721,110191   | -721,101063    | -721,143473    | 9,1     | 7,1     | 373,6 | 0,06   | 0,02        | 0,56         | -11,7085588        | 6,06696285        | -11,7092474        |
| CYS9   | -721,111086   | -721,101943    | -721,144657    | 6,8     | 4,0     | 376,3 | 0,20   | 0,06        | 1,35         | -40,599596         | 21,1880529        | -40,6020009        |
| CYS10  | -721,111427   | -721,1022      | -721,14473     | 6,1     | 3,8     | 374,7 | 0,22   | 0,06        | 1,42         | -43,834583         | 22,7777698        | -43,8371683        |
| CYS11  | -721,110488   | -721,101195    | -721,144081    | 8,8     | 5,5     | 377,8 | 0,11   | 0,03        | 0,89         | -22,1722582        | 11,6178299        | -22,1735769        |
| CYS12  | -721,110273   | -721,100973    | -721,143832    | 9,4     | 6,1     | 377,6 | 0,09   | 0,02        | 0,74         | -17,0703283        | 8,93888983        | -17,0713429        |
| CYS13  | -721,109903   | -721,100805    | -721,143102    | 9,8     | 8,1     | 372,7 | 0,04   | 0,01        | 0,41         | -7,93033704        | 4,09827398        | -7,9308022         |
|        |               |                |                |         |         |       |        | <b>1,00</b> | <b>17,53</b> | <b>-721,102752</b> | <b>375,642996</b> | <b>-721,145389</b> |
| CYSH+1 | -721,455613   | -721,446643    | -721,488645    | 0,0     | 0,0     | 370,1 | 1,00   | 0,53        | 2,80         | -382,118826        | 196,001749        | -382,141073        |
| CYSH+2 | -721,454972   | -721,445861    | -721,488081    | 2,1     | 1,5     | 372,0 | 0,55   | 0,29        | 2,99         | -211,329334        | 108,960735        | -211,341701        |
| CYSH+3 | -721,45327    | -721,443991    | -721,486658    | 7,0     | 5,2     | 375,9 | 0,12   | 0,07        | 1,49         | -47,4169874        | 24,7069538        | -47,4197917        |
| CYSH+4 | -721,453695   | -721,444511    | -721,48711     | 5,6     | 4,0     | 375,3 | 0,20   | 0,11        | 1,97         | -76,2236414        | 39,6535361        | -76,2281421        |
| CYSH+5 | -721,450942   | -721,441905    | -721,484065    | 12,4    | 12,0    | 371,4 | 0,01   | 0,00        | 0,20         | -3,11369168        | 1,60313687        | -3,11387364        |
| CYSH+6 | -721,449345   | -721,440067    | -721,483191    | 17,3    | 14,3    | 379,9 | 0,00   | 0,00        | 0,09         | -1,24350214        | 0,65487902        | -1,24357647        |
|        |               |                |                |         |         |       |        | <b>1,00</b> | <b>9,54</b>  | <b>-721,445983</b> | <b>371,58099</b>  | <b>-721,488158</b> |
| CYS-H1 | -720,582826   | -720,574565    | -720,614881    | 1,7     | 1,7     | 355,2 | 0,50   | 0,29        | 2,98         | -207,292447        | 102,182787        | -207,304045        |
| CYS-H2 | -720,583409   | -720,575208    | -720,615534    | 0,0     | 0,0     | 355,3 | 1,00   | 0,57        | 2,66         | -411,542409        | 202,915949        | -411,565441        |
| CYS-H3 | -720,581477   | -720,573212    | -720,613565    | 5,2     | 5,2     | 355,5 | 0,13   | 0,07        | 1,58         | -52,0427504        | 25,6775577        | -52,0456649        |
| CYS-H6 | -720,579355   | -720,570528    | -720,612412    | 12,3    | 8,2     | 369,0 | 0,04   | 0,02        | 0,69         | -15,5052888        | 7,94048948        | -15,5061901        |
| CYS-H7 | -720,58117    | -720,572927    | -720,613165    | 6,0     | 6,2     | 354,5 | 0,08   | 0,05        | 1,20         | -34,1917747        | 16,821931         | -34,193684         |
|        |               |                |                |         |         |       |        | <b>1,00</b> | <b>9,11</b>  | <b>-720,57467</b>  | <b>355,538715</b> | <b>-720,615024</b> |
| CYS-H4 | -720,58148    | -720,573214    | -720,613567    | 5,2     | 5,2     |       |        |             |              |                    |                   |                    |
| CYS-H5 | -720,582823   | -720,57456     | -720,614883    | 1,7     | 1,7     |       |        |             |              |                    |                   |                    |
| CYS-H8 | -720,58341    | -720,575208    | -720,615535    | 0,0     | 0,0     |       |        |             |              |                    |                   |                    |



G4

| Files  | H(0K/hartree) | H(298/hartree) | G(298/hartree) | delta H | delta G | S     | xibrut | xinorm      | Smix         | Hi                 | Si                | Gi                 |
|--------|---------------|----------------|----------------|---------|---------|-------|--------|-------------|--------------|--------------------|-------------------|--------------------|
| CYS1   | -721,658949   | -721,650112    | -721,691747    | 0,0     | 0,0     | 366,8 | 1,00   | 0,31        | 3,01         | -220,251556        | 111,955808        | -220,264263        |
| CYS2   | -721,657048   | -721,647719    | -721,690696    | 6,3     | 2,8     | 378,6 | 0,33   | 0,10        | 1,93         | -73,0399691        | 38,3236789        | -73,0443189        |
| CYS3   | -721,654142   | -721,644824    | -721,688596    | 13,9    | 8,3     | 385,6 | 0,04   | 0,01        | 0,42         | -8,04928125        | 4,30155768        | -8,04976949        |
| CYS4   | -721,657365   | -721,648071    | -721,690928    | 5,4     | 2,2     | 377,6 | 0,42   | 0,13        | 2,20         | -93,1912377        | 48,7603877        | -93,1967721        |
| CYS5   | -721,657295   | -721,647845    | -721,691361    | 6,0     | 1,0     | 383,4 | 0,67   | 0,20        | 2,69         | -146,846818        | 78,0160481        | -146,855673        |
| CYS6   | -721,656663   | -721,647691    | -721,689696    | 6,4     | 5,4     | 370,1 | 0,12   | 0,04        | 0,98         | -25,55433          | 13,1049697        | -25,5556175        |
| CYS7   | -721,65486    | -721,645488    | -721,689382    | 12,1    | 6,2     | 386,7 | 0,08   | 0,03        | 0,78         | -18,3759165        | 9,84750083        | -18,3770342        |
| CYS8   | -721,65567    | -721,646543    | -721,688952    | 9,4     | 7,3     | 373,6 | 0,05   | 0,02        | 0,56         | -11,6984503        | 6,05700024        | -11,6991378        |
| CYS9   | -721,656464   | -721,647321    | -721,690035    | 7,3     | 4,5     | 376,3 | 0,17   | 0,05        | 1,25         | -36,4821851        | 19,0248763        | -36,4843445        |
| CYS10  | -721,656944   | -721,647717    | -721,690247    | 6,3     | 3,9     | 374,7 | 0,21   | 0,06        | 1,45         | -45,5799082        | 23,6667894        | -45,5825945        |
| CYS11  | -721,6559     | -721,646607    | -721,689493    | 9,2     | 5,9     | 377,8 | 0,09   | 0,03        | 0,85         | -20,6479217        | 10,8109304        | -20,6491488        |
| CYS12  | -721,655588   | -721,646288    | -721,689147    | 10,0    | 6,8     | 377,6 | 0,07   | 0,02        | 0,65         | -14,3571063        | 7,51242805        | -14,357959         |
| CYS13  | -721,655338   | -721,646241    | -721,688538    | 10,2    | 8,4     | 372,7 | 0,03   | 0,01        | 0,40         | -7,57363521        | 3,91097782        | -7,57407912        |
|        |               |                |                |         |         |       |        | <b>1,00</b> | <b>17,16</b> | <b>-721,648315</b> | <b>375,292953</b> | <b>-721,690912</b> |
| CYSH+1 | -722,000898   | -721,991927    | -722,033929    | 0,0     | 0,0     | 370,1 | 1,00   | 0,54        | 2,76         | -391,457878        | 200,640418        | -391,480651        |
| CYSH+2 | -722,000177   | -721,991066    | -722,033286    | 2,3     | 1,7     | 372,0 | 0,51   | 0,28        | 2,95         | -199,257533        | 102,658973        | -199,269185        |
| CYSH+3 | -721,998485   | -721,989207    | -722,031873    | 7,1     | 5,4     | 375,9 | 0,12   | 0,06        | 1,44         | -45,1803813        | 23,5232256        | -45,1830512        |
| CYSH+4 | -721,99902    | -721,989836    | -722,032435    | 5,5     | 3,9     | 375,3 | 0,21   | 0,11        | 2,05         | -81,5222689        | 42,3779884        | -81,5270789        |
| CYSH+5 | -721,996264   | -721,987227    | -722,029388    | 12,3    | 11,9    | 371,5 | 0,01   | 0,00        | 0,21         | -3,32315026        | 1,7097284         | -3,32334432        |
| CYSH+6 | -721,994611   | -721,985333    | -722,028457    | 17,3    | 14,4    | 379,9 | 0,00   | 0,00        | 0,09         | -1,25003854        | 0,65782417        | -1,25011321        |
|        |               |                |                |         |         |       |        | <b>1,00</b> | <b>9,50</b>  | <b>-721,99125</b>  | <b>371,568158</b> | <b>-722,033424</b> |
| CYS-H1 | -721,129039   | -721,120778    | -721,161094    | 1,7     | 1,7     | 355,2 | 0,50   | 0,29        | 2,98         | -206,546734        | 101,738075        | -206,556281        |
| CYS-H2 | -721,129628   | -721,121427    | -721,161753    | 0,0     | 0,0     | 355,3 | 1,00   | 0,57        | 2,66         | -412,653971        | 203,309903        | -412,677047        |
| CYS-H3 | -721,127805   | -721,11954     | -721,159893    | 5,0     | 4,9     | 355,5 | 0,14   | 0,08        | 1,69         | -58,5121709        | 28,8476562        | -58,5154452        |
| CYS-H6 | -721,125396   | -721,116569    | -721,158453    | 12,8    | 8,7     | 369,0 | 0,03   | 0,02        | 0,60         | -12,8963286        | 6,59940109        | -12,8970776        |
| CYS-H7 | -721,127278   | -721,119035    | -721,159273    | 6,3     | 6,5     | 354,5 | 0,07   | 0,04        | 1,11         | -30,5116959        | 15,0000094        | -30,5133984        |
|        |               |                |                |         |         |       |        | <b>1,00</b> | <b>9,04</b>  | <b>-721,1209</b>   | <b>355,495045</b> | <b>-721,161249</b> |
| CYS-H4 | -721,127808   | -721,119543    | -721,159896    | 4,9     | 4,9     |       |        |             |              |                    |                   |                    |
| CYS-H5 | -721,129037   | -721,120774    | -721,161097    | 1,7     | 1,7     |       |        |             |              |                    |                   |                    |
| CYS-H8 | -721,129629   | -721,121426    | -721,161754    | 0,0     | 0,0     |       |        |             |              |                    |                   |                    |

## L-Methionine

Figure S16. Relative  $H^{\circ}_{298}$  and  $G^{\circ}_{298}$  ( $\text{kJ mol}^{-1}$ ) of the most stable conformers of neutral L-methionine.

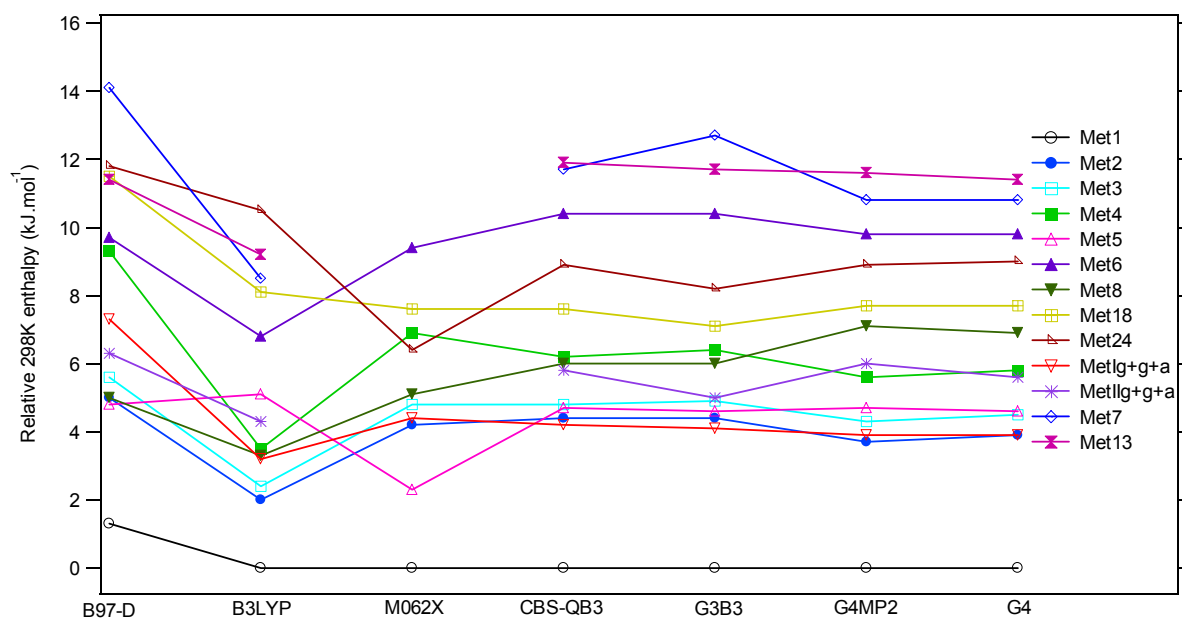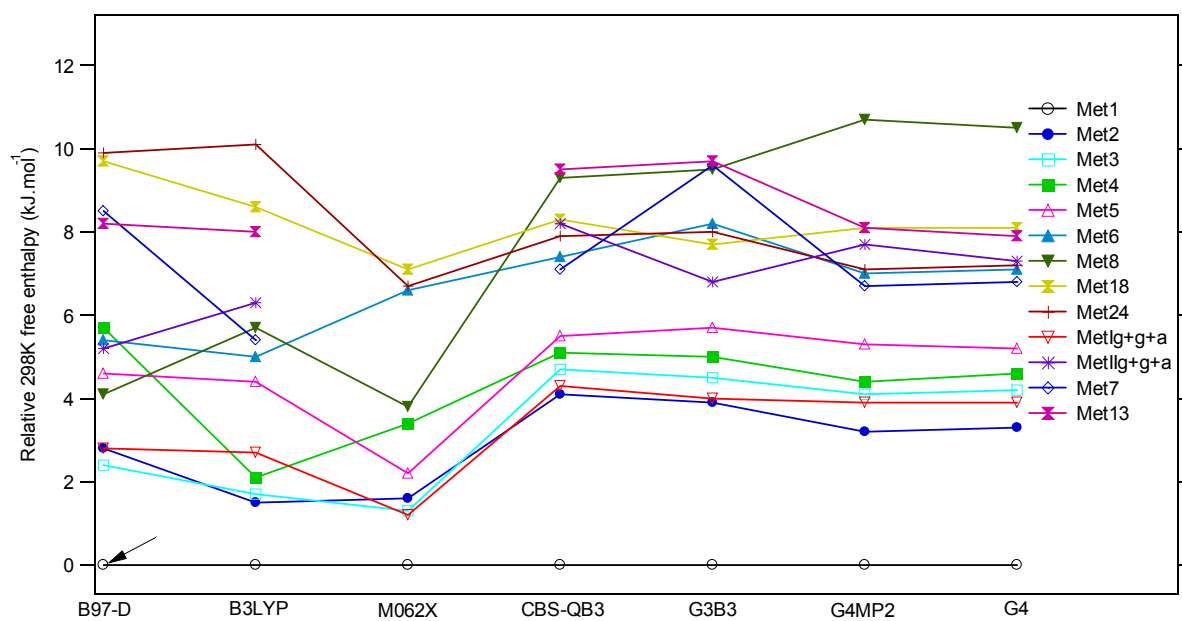

Figure S17 Relative  $H^{\circ}_{298}$  and  $G^{\circ}_{298}$  ( $\text{kJ mol}^{-1}$ ) of the nine most stable conformers of deprotonated L-methionine.

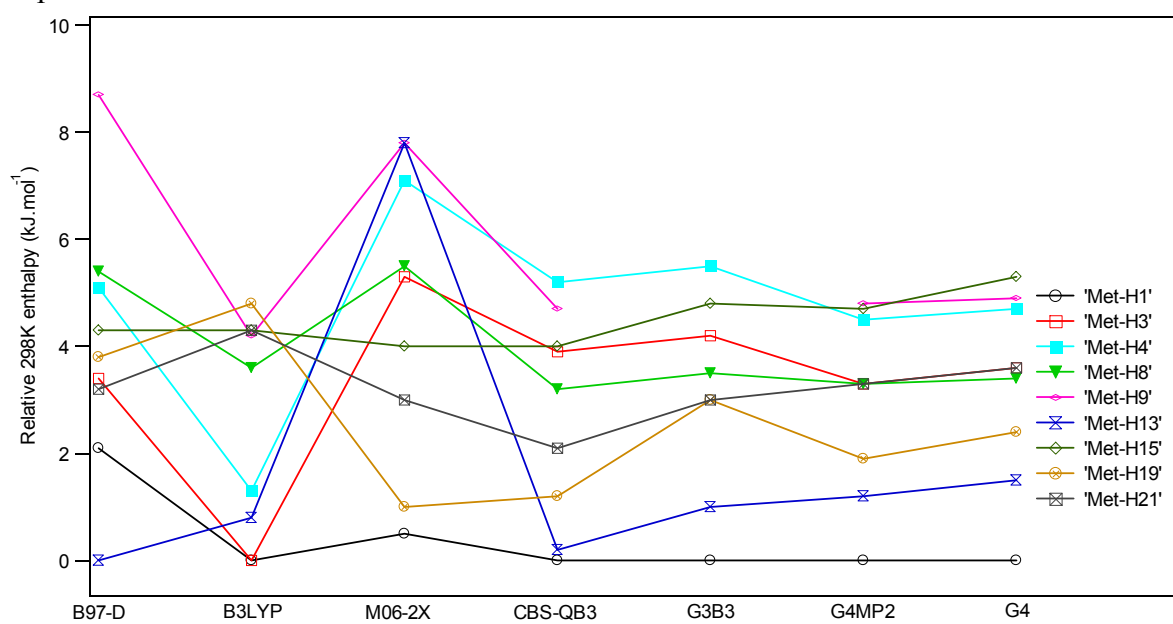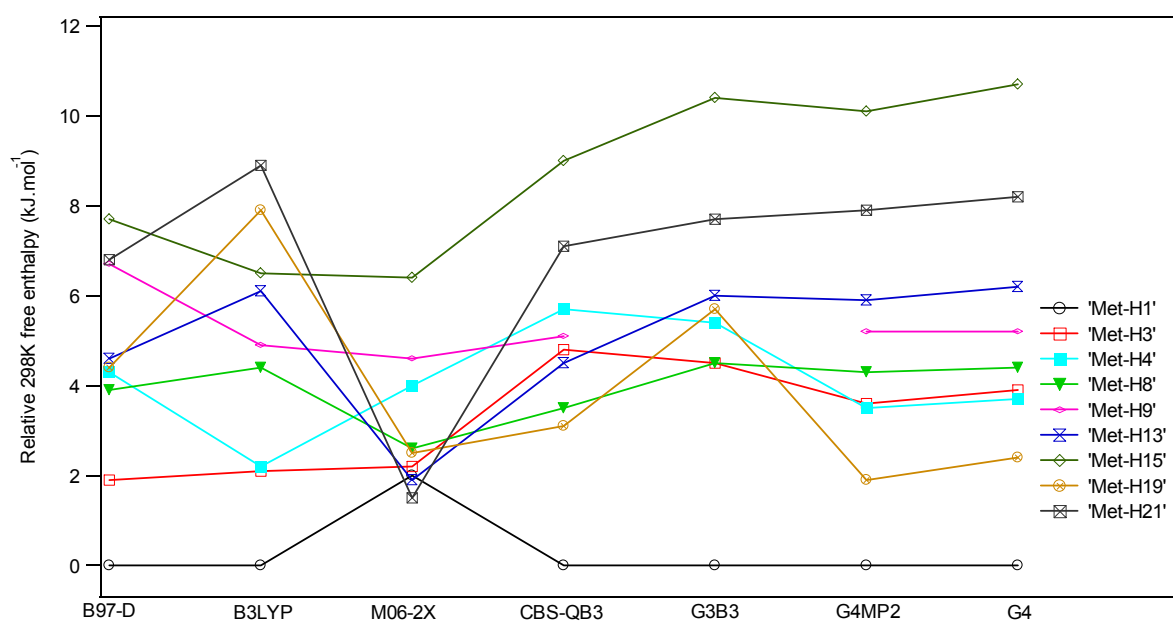

Figure S18. Relative  $H^{\circ}_{298}$  and  $G^{\circ}_{298}$  ( $\text{kJ mol}^{-1}$ ) of the six most stable conformers of protonated L-methionine.

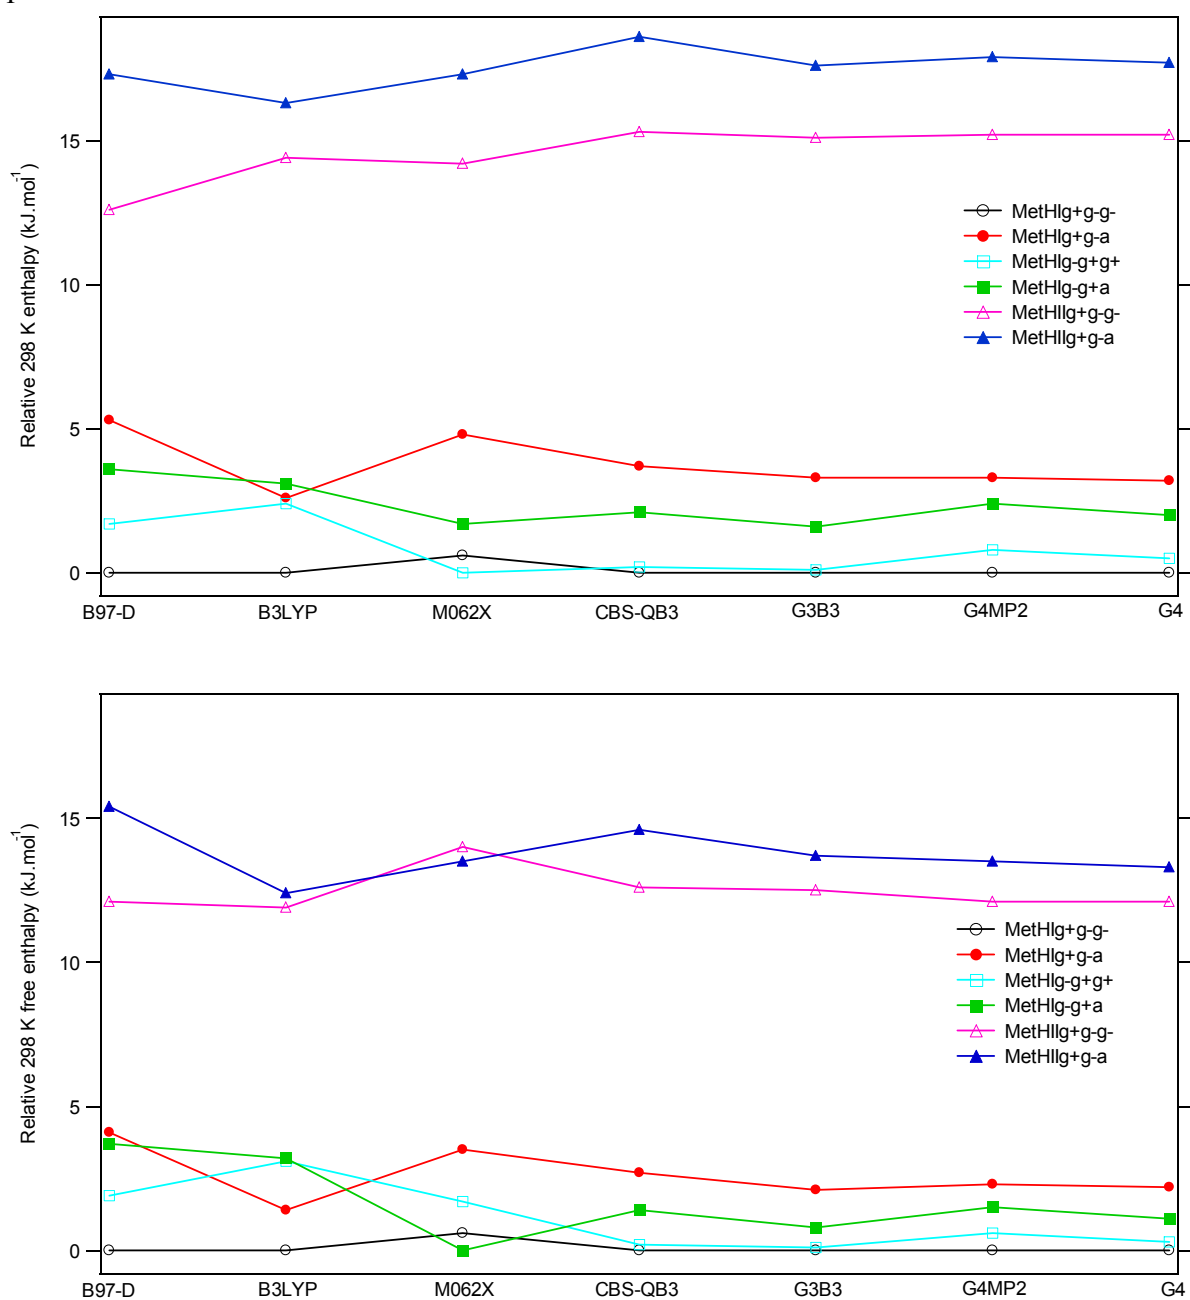

Figure S19. Optimized B3LYP/6-31+G(d,p) geometries of the first thirty two conformers of neutral L-methionine (into brackets, relative  $H^{\circ}_{298}$  and  $G^{\circ}_{298}$  in  $\text{kJ mol}^{-1}$  calculated).

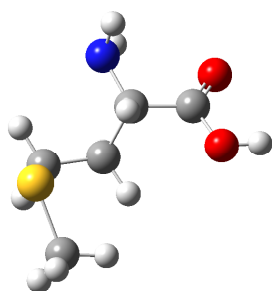

Met1 [0.0; 0.0]

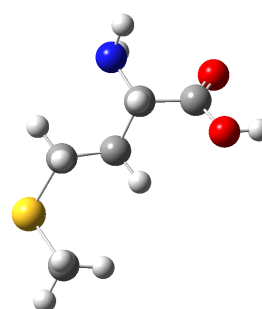

Met2 [2.0; 1.5]

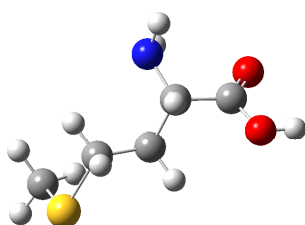

Met3 [2.4; 1.7]

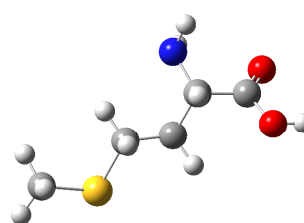

Met4 [3.5; 2.1]

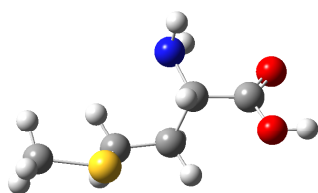

Met5 [3.2; 2.7]

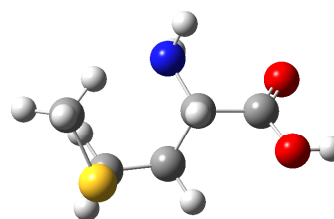

Met6 [5.1; 4.4]

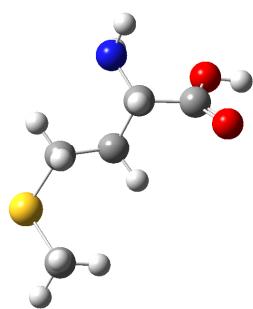

Met6 [6.8; 5.0]

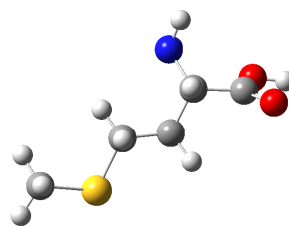

Met7 [8.5; 5.4]

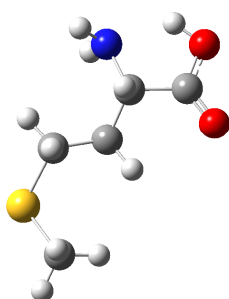

MetIIg+ag- [3.9; 5.5]

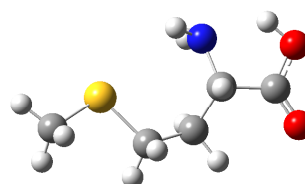

Met8 [3.3; 5.7]

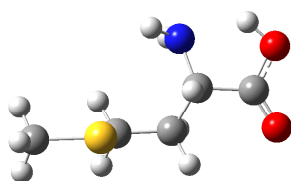

MetIIg+g+a [4.3; 6.3]

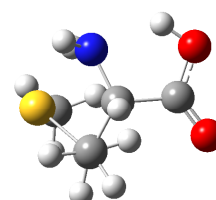

Met9 [2.5; 6.4]

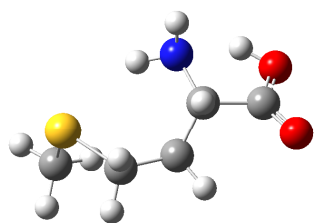

Met10 [2.1; 6.7]

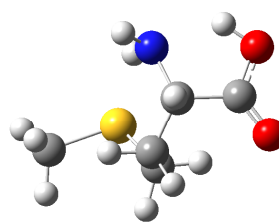

Met11 [2.7; 7.2]

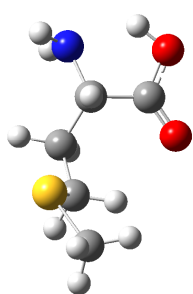

Met12 [6.3; 7.6]

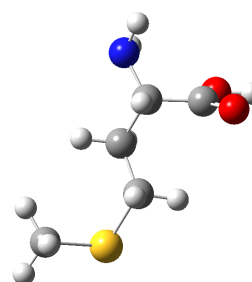

Met13 [9.8; 8.0]

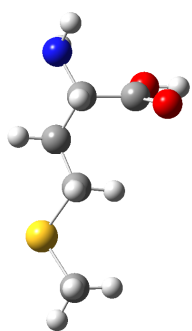

Met14 [10.2; 8.1]

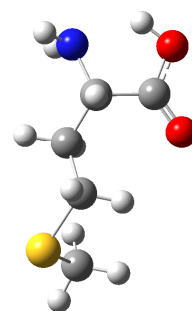

Met15 [6.9; 8.3]

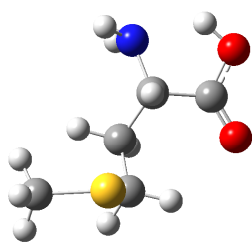

Met16 [5.6; 8.4]

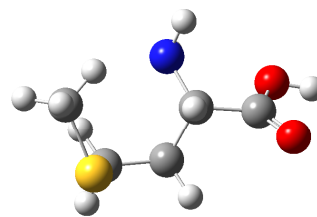

Met17 [11.5; 8.5]

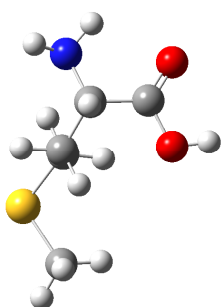

Met18 [8.1; 8.6]

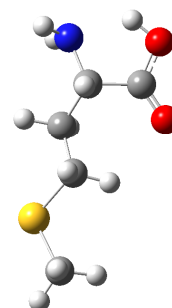

Met19 [8.1; 8.8]

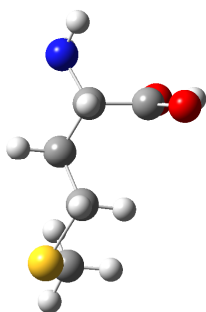

Met20 [10.4; 9.0]

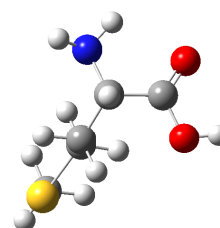

Met21 [9.1; 9.2]



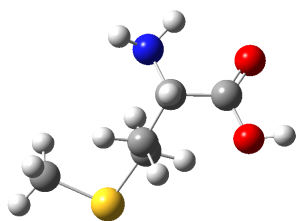

Met22 [9.1; 9.6]

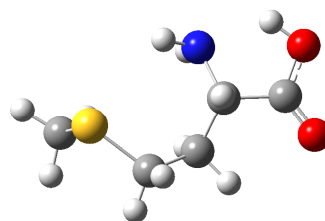

Met23 [5.8; 9.8]

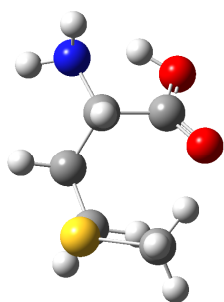

Met24 [10.5; 10.1]

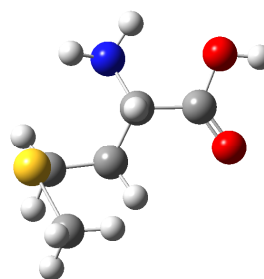

Met25 [6.9; 10.1]

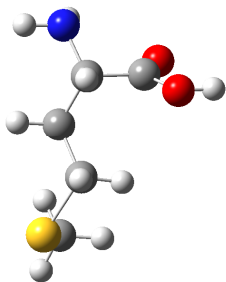

Met26 [11.4; 10.4]

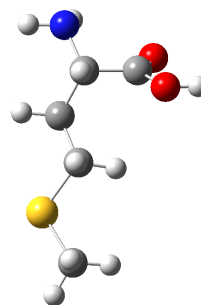

Met27 [12.1; 10.5]

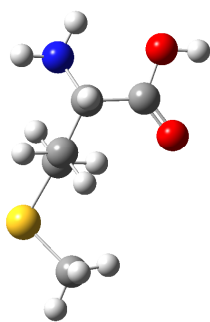

Met28 [11.7; 11.4]

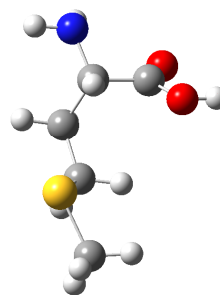

Met29 [14.6; 11.8]

Figure S20. Optimized B3LYP/6-31+G(d,p) geometries of the first twenty four conformers of deprotonated L-methionine (into brackets, relative  $H^{\circ}_{298}$  and  $G^{\circ}_{298}$  in  $\text{kJ mol}^{-1}$  calculated).

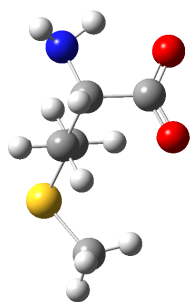

Met-H1 [0.0; 0.0]

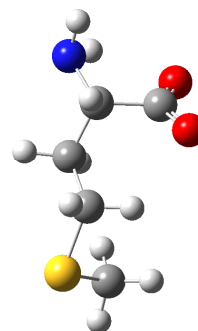

Met-H2 [1.6; 2.0]

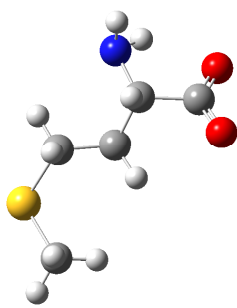

Met-H3 [0.0; 2.1]

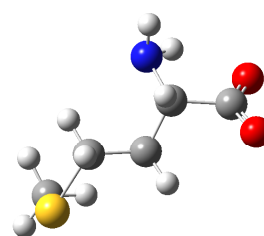

Met-H4 [1.3; 2.2]

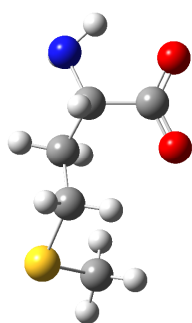

Met-H5 [2.4; 2.7]

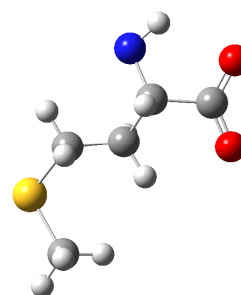

Met-H6 [2.6; 4.3]

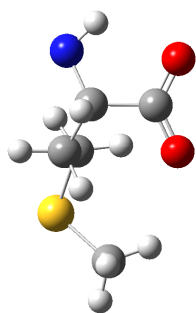

Met-H7 [5.2; 4.3]

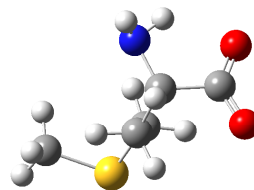

Met-H8 [3.6; 4.4]

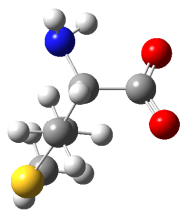

Met-H9 [4.2; 4.9]

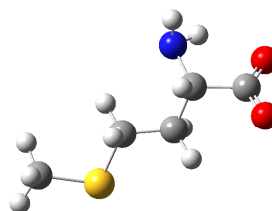

Met-H10 [4.1; 5.0]

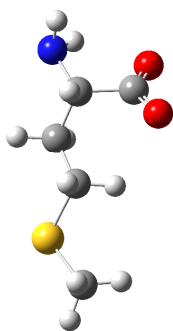

Met-H11 [4.1; 5.2]

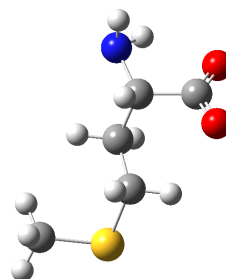

Met-H12 [3.7; 6.1]

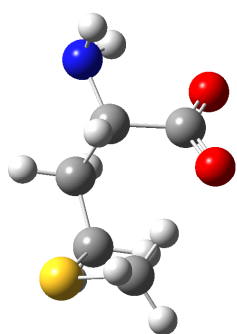

Met-H13 [0.8; 6.1]

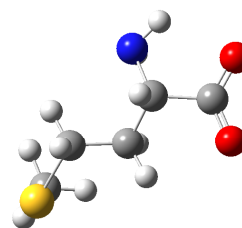

Met-H14 [5.6; 6.4]

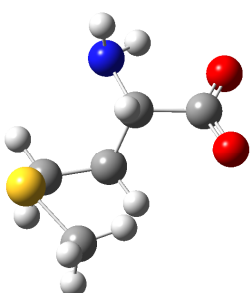

Met-H15 [4.3; 6.5]

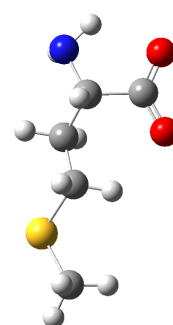

Met-H16 [5.6; 6.6]

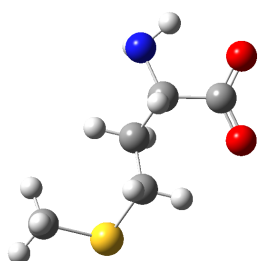

Met-H17 [4.6; 7.1]

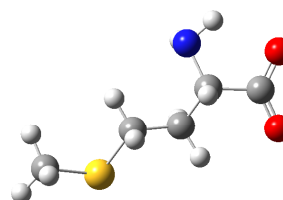

Met-H18 [6.9; 7.5]

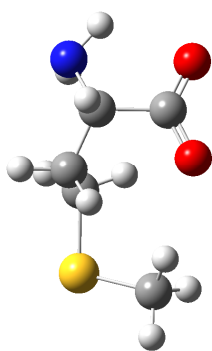

Met-H19 [4.8; 7.9]

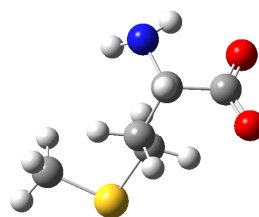

Met-H20 [9.0; 8.6]

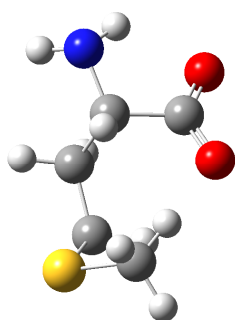

Met-H21 [4.3; 8.9]

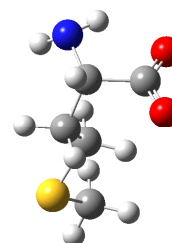

Met-H22 [8.2; 10.2]

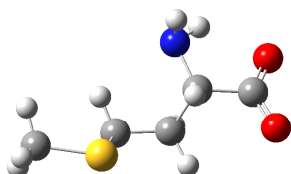

Met-H23 [10.2; 11.5]

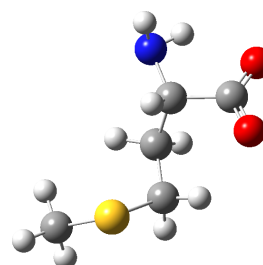

Met-H24 [9.1; 11.7]

Figure S21. Optimized B3LYP/6-31+G(d,p) geometries of the first six conformers of protonated L-methionine (into brackets, relative  $H^{\circ}_{298}$  and  $G^{\circ}_{298}$  in  $\text{kJ mol}^{-1}$  calculated).

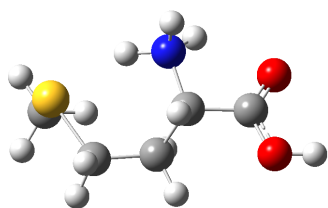

MetH+1 [0.0; 0.0]

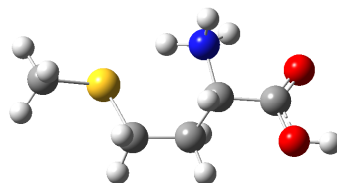

MetH+2 [2.6; 1.4]

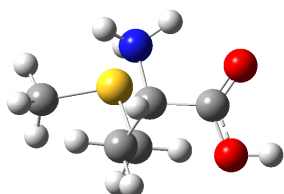

MetH+3 [2.4; 3.1]

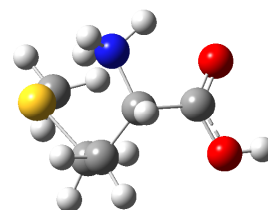

MetH+4 [3.1; 3.2]

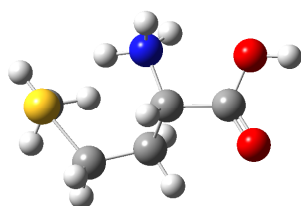

MetH+5 [14.4; 11.9]

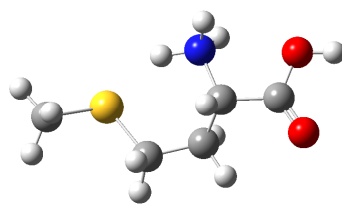

MetH+6 [16.3; 12.4]

Table T4. Relative energies calculated with Composite methods and DFT for different forms of L-methionine.  
**B97D/6-31+G(d,p)**

| Files         | H(0K/hartree)      | H(298/hartree)     | G(298/hartree)     | delta H     | delta G    | S             | xibrut      | xinorm      | Smix         | Hi                 | Si                | Gi                 |
|---------------|--------------------|--------------------|--------------------|-------------|------------|---------------|-------------|-------------|--------------|--------------------|-------------------|--------------------|
| MethH+1       | -800,529706        | -800,517715        | -800,56714         | 0,0         | 0,0        | 435,5         | 1,00        | 0,53        | 2,81         | -420,998557        | 229,008761        | -421,02455         |
| MethH+2       | -800,527765        | -800,515698        | -800,565572        | 5,3         | 4,1        | 439,4         | 0,19        | 0,10        | 1,93         | -81,1186815        | 44,5267493        | -81,1237354        |
| MethH+3       | -800,528989        | -800,517085        | -800,566416        | 1,7         | 1,9        | 434,6         | 0,47        | 0,25        | 2,87         | -196,818861        | 106,859168        | -196,83099         |
| MethH+4       | -800,528252        | -800,516358        | -800,565746        | 3,6         | 3,7        | 435,1         | 0,23        | 0,12        | 2,13         | -97,3827325        | 52,9332968        | -97,3887406        |
| MethH+5       | -800,524888        | -800,512912        | -800,562525        | 12,6        | 12,1       | 437,1         | 0,01        | 0,00        | 0,19         | -3,30669898        | 1,80558346        | -3,30690392        |
| MethH+6       | -800,523204        | -800,511118        | -800,561277        | 17,3        | 15,4       | 441,9         | 0,00        | 0,00        | 0,06         | -0,89163231        | 0,49222431        | -0,89168818        |
|               |                    |                    |                    |             |            |               | <b>1,00</b> | <b>9,99</b> | <b>9,99</b>  | <b>-800,517163</b> | <b>435,625762</b> | <b>-800,566608</b> |
| <b>Met-H1</b> | <b>-799,63138</b>  | <b>-799,619134</b> | <b>-799,670051</b> | <b>2,1</b>  | <b>0,0</b> | <b>448,60</b> | <b>1,00</b> | <b>0,28</b> | <b>2,97</b>  | <b>-225,359736</b> | <b>126,430459</b> | <b>-225,374086</b> |
| Met-H2        | -799,630501        | -799,618451        | -799,669192        | 3,9         | 2,3        | 447,05        | 0,41        | 0,11        | 2,06         | -91,4301505        | 51,1165352        | -91,4359523        |
| Met-H3        | <b>-799,630837</b> | <b>-799,618627</b> | <b>-799,669309</b> | <b>3,4</b>  | <b>1,9</b> | <b>446,53</b> | <b>0,46</b> | <b>0,13</b> | <b>2,20</b>  | <b>-103,383866</b> | <b>57,7323679</b> | <b>-103,390419</b> |
| Met-H4        | <b>-799,63009</b>  | <b>-799,617977</b> | <b>-799,668407</b> | <b>5,1</b>  | <b>4,3</b> | <b>444,31</b> | <b>0,18</b> | <b>0,05</b> | <b>1,25</b>  | <b>-40,0916348</b> | <b>22,2769609</b> | <b>-40,0941633</b> |
| Met-H5        | -799,62988         | -799,617631        | -799,669332        | 6,0         | 1,9        | 455,51        | 0,47        | 0,13        | 2,23         | -105,911334        | 60,3329803        | -105,918182        |
| Met-H8        | -799,630094        | -799,617854        | -799,668572        | 5,4         | 3,9        | 446,85        | 0,21        | 0,06        | 1,40         | -47,6770691        | 26,6431117        | -47,6800932        |
| Met-H9        | -799,628852        | -799,616628        | -799,667507        | 8,7         | 6,7        | 448,26        | 0,07        | 0,02        | 0,64         | -15,5799685        | 8,73411858        | -15,5809598        |
| Met-H10       | <b>-799,628213</b> | <b>-799,615955</b> | <b>-799,666977</b> | <b>10,4</b> | <b>8,1</b> | <b>449,52</b> | <b>0,04</b> | <b>0,01</b> | <b>0,42</b>  | <b>-8,92966765</b> | <b>5,02003888</b> | <b>-8,93023743</b> |
| Met-H11       | <b>-799,628789</b> | <b>-799,61658</b>  | <b>-799,66731</b>  | <b>8,8</b>  | <b>7,2</b> | <b>446,95</b> | <b>0,06</b> | <b>0,02</b> | <b>0,55</b>  | <b>-12,6682208</b> | <b>7,08099772</b> | <b>-12,6690245</b> |
| Met-H12       | <b>-799,629817</b> | <b>-799,617723</b> | <b>-799,667939</b> | <b>5,8</b>  | <b>5,5</b> | <b>442,42</b> | <b>0,11</b> | <b>0,03</b> | <b>0,89</b>  | <b>-24,5245287</b> | <b>13,569259</b>  | <b>-24,5260688</b> |
| Met-H13       | -799,631547        | -799,619924        | -799,668281        | 0,0         | 4,6        | 426,04        | 0,16        | 0,04        | 1,14         | -35,122605         | 18,7136379        | -35,124729         |
| Met-H15       | -799,63001         | -799,618292        | -799,667123        | 4,3         | 7,7        | 430,22        | 0,05        | 0,01        | 0,47         | -10,4094214        | 5,6006089         | -10,4100571        |
| Met-H19       | -799,630387        | -799,618475        | -799,668377        | 3,8         | 4,4        | 439,66        | 0,17        | 0,05        | 1,22         | -38,8482227        | 21,3600392        | -38,8506471        |
| Met-H20       | -799,628533        | -799,616345        | -799,667276        | 9,4         | 7,3        | 448,72        | 0,05        | 0,02        | 0,53         | -12,2238561        | 6,85969063        | -12,2246347        |
| Met-H21       | -799,630363        | -799,618693        | -799,667467        | 3,2         | 6,8        | 429,72        | 0,07        | 0,02        | 0,62         | -14,93908          | 8,02832691        | -14,9399913        |
| Met-H22       | -799,627962        | -799,615744        | -799,666657        | 11,0        | 8,9        | 448,56        | 0,03        | 0,01        | 0,32         | -6,38093675        | 3,57954272        | -6,38134304        |
| Met-H23       | -799,625945        | -799,613833        | -799,664416        | 16,0        | 14,8       | 445,66        | 0,00        | 0,00        | 0,05         | -0,60641805        | 0,3379809         | -0,60645641        |
| Met-H24       | -799,627878        | -799,615814        | -799,666521        | 10,8        | 9,3        | 446,75        | 0,02        | 0,01        | 0,29         | -5,53165916        | 3,0905638         | -5,53200995        |
| <b>Met-H6</b> | <b>-799,630838</b> | <b>-799,618627</b> | <b>-799,669316</b> | <b>3,4</b>  | <b>1,9</b> |               |             | <b>1,00</b> | <b>19,22</b> | <b>-799,618376</b> | <b>446,50722</b>  | <b>-799,669055</b> |
| Met-H14       | <b>-799,630088</b> | <b>-799,617975</b> | <b>-799,66841</b>  | <b>5,1</b>  | <b>4,3</b> |               |             |             |              |                    |                   |                    |
| Met-H18       | <b>-799,628213</b> | <b>-799,615956</b> | <b>-799,666977</b> | <b>10,4</b> | <b>8,1</b> |               |             |             |              |                    |                   |                    |
| Met-H16       | <b>-799,628789</b> | <b>-799,616581</b> | <b>-799,667306</b> | <b>8,8</b>  | <b>7,2</b> |               |             |             |              |                    |                   |                    |
| Met-H17       | <b>-799,629815</b> | <b>-799,617722</b> | <b>-799,667937</b> | <b>5,8</b>  | <b>5,6</b> |               |             |             |              |                    |                   |                    |



|                   |             |             |             |             |              |                   |                   |                    |             |            |             |
|-------------------|-------------|-------------|-------------|-------------|--------------|-------------------|-------------------|--------------------|-------------|------------|-------------|
| <b>Met-H7</b>     | -799,631378 | -799,619132 | -799,670048 | 2,1         | 0,0          | 1,00              | 0,22              | 2,78               | -178,871457 | 99,7252269 | -178,882776 |
| <b>Met1</b>       | -800,167003 | -800,154788 | -800,205422 | 1,3         | 0,0          | 446,1             | 0,0               | 0,22               | -178,871457 | 99,7252269 | -178,882776 |
| <b>Met2</b>       | -800,165746 | -800,153371 | -800,204356 | 5,0         | 2,8          | 449,2             | 0,33              | 0,07               | -58,3904566 | 32,7798388 | -58,3941772 |
| <b>Met3</b>       | -800,165594 | -800,153166 | -800,204501 | 5,6         | 2,4          | 452,3             | 0,38              | 0,08               | -67,9947982 | 38,4336726 | -67,9991605 |
| <b>MetIlg+g+a</b> | -800,164882 | -800,152501 | -800,204356 | 7,3         | 2,8          | 456,9             | 0,33              | 0,07               | -58,3903931 | 33,3391888 | -58,3941772 |
| <b>MetIlg+g+a</b> | -800,165004 | -800,152895 | -800,203452 | 6,3         | 5,2          | 445,4             | 0,13              | 0,03               | -22,5959586 | 12,5786735 | -22,5973863 |
| <b>MetIlg+ag-</b> | -800,165386 | -800,153212 | -800,203706 | 5,4         | 4,5          | 444,9             | 0,16              | 0,04               | -29,5038942 | 16,4036964 | -29,5057561 |
| <b>Met4</b>       | -800,164243 | -800,151752 | -800,20324  | 9,3         | 5,7          | 453,6             | 0,10              | 0,02               | -18,0858025 | 10,2533836 | -18,0869663 |
| <b>Met5</b>       | -800,165702 | -800,153443 | -800,203666 | 4,8         | 4,6          | 442,5             | 0,16              | 0,04               | -28,2901744 | 15,6444665 | -28,2919501 |
| <b>Met6</b>       | -800,164035 | -800,151602 | -800,203353 | 9,7         | 5,4          | 455,9             | 0,11              | 0,03               | -20,3646316 | 11,6042956 | -20,3659487 |
| <b>Met7</b>       | -800,162505 | -800,149924 | -800,202175 | 14,1        | 8,5          | 460,4             | 0,03              | 0,01               | -5,91009528 | 3,40027059 | -5,91048122 |
| <b>Met8</b>       | -800,165458 | -800,153366 | -800,203879 | 5,0         | 4,1          | 445,0             | 0,20              | 0,04               | -35,3821358 | 19,6793038 | -35,3843695 |
| <b>Met9</b>       | -800,166158 | -800,154246 | -800,204044 | 2,7         | 3,6          | 438,7             | 0,24              | 0,05               | -42,0765743 | 23,0714197 | -42,0791929 |
| <b>Met10</b>      | -800,166792 | -800,154857 | -800,204693 | 1,1         | 1,9          | 439,1             | 0,47              | 0,10               | -83,185389  | 45,6469686 | -83,19057   |
| <b>Met11</b>      | -800,167055 | -800,155284 | -800,204278 | 0,0         | 3,0          | 431,7             | 0,30              | 0,07               | -53,7981593 | 29,0222979 | -53,8014534 |
| <b>Met12</b>      | -800,164944 | -800,152941 | -800,202863 | 6,2         | 6,7          | 439,8             | 0,07              | 0,02               | -12,1727923 | 6,69121434 | -12,1735518 |
| <b>Met13</b>      | -800,163358 | -800,150942 | -800,2023   | 11,4        | 8,2          | 452,5             | 0,04              | 0,01               | -6,7391798  | 3,81100031 | -6,73961236 |
| <b>Met14</b>      | -800,162348 | -800,149848 | -800,201462 | 14,3        | 10,4         | 454,7             | 0,02              | 0,00               | -2,79510384 | 1,58850979 | -2,79528414 |
| <b>Met15</b>      | -800,164198 | -800,151978 | -800,203051 | 8,7         | 6,2          | 450,0             | 0,08              | 0,02               | -14,8298156 | 8,33969935 | -14,8307622 |
| <b>Met16</b>      | -800,165119 | -800,153125 | -800,203169 | 5,7         | 5,9          | 440,9             | 0,09              | 0,02               | -16,7863281 | 9,24975814 | -16,787378  |
| <b>Met17</b>      | -800,163447 | -800,151145 | -800,202058 | 10,9        | 8,8          | 448,6             | 0,03              | 0,01               | -5,22675214 | 2,93011268 | -5,22708472 |
| <b>Met18</b>      | -800,163218 | -800,150886 | -800,201713 | 11,5        | 9,7          | 447,8             | 0,02              | 0,00               | -3,63813343 | 2,03608999 | -3,63836453 |
| <b>Met19</b>      | -800,162804 | -800,150558 | -800,201455 | 12,4        | 10,4         | 448,4             | 0,02              | 0,00               | -2,77463372 | 1,55496956 | -2,77481021 |
| <b>Met20</b>      | -800,163225 | -800,150847 | -800,202015 | 11,6        | 8,9          | 450,8             | 0,03              | 0,01               | -4,9959676  | 2,81476372 | -4,99628708 |
| <b>Met21</b>      | -800,161853 | -800,149426 | -800,200656 | 15,4        | 12,5         | 451,4             | 0,01              | 0,00               | -1,19890367 | 0,67629053 | -1,19898043 |
| <b>Met22</b>      | -800,162839 | -800,150461 | -800,201297 | 12,7        | 10,8         | 447,9             | 0,01              | 0,00               | -2,35040352 | 1,31564251 | -2,35055285 |
| <b>Met23</b>      | -800,165387 | -800,153629 | -800,202621 | 4,3         | 7,4          | 431,6             | 0,05              | 0,01               | -9,4409422  | 5,09287348 | -9,44152025 |
| <b>Met24</b>      | -800,162973 | -800,150799 | -800,201669 | 11,8        | 9,9          | 448,2             | 0,02              | 0,00               | -3,4738443  | 1,94579016 | -3,47406515 |
| <b>Met25</b>      | -800,164907 | -800,153048 | -800,20208  | 5,9         | 8,8          | 432,0             | 0,03              | 0,01               | -5,3489317  | 2,88781492 | -5,34925947 |
| <b>Met26</b>      | -800,162705 | -800,150302 | -800,201413 | 13,1        | 10,5         | 450,3             | 0,01              | 0,00               | -2,65490806 | 1,49412884 | -2,65507765 |
| <b>Met27</b>      | -800,161501 | -800,148996 | -800,200549 | 16,5        | 12,8         | 454,2             | 0,01              | 0,00               | -1,07147435 | 0,60821988 | -1,07154338 |
| <b>Met28</b>      | -800,161822 | -800,149526 | -800,200656 | 15,1        | 12,5         | 450,5             | 0,01              | 0,00               | -1,19890382 | 0,67497042 | -1,19898043 |
| <b>Met29</b>      | -800,161006 | -800,148664 | -800,200023 | 17,4        | 14,2         | 452,5             | 0,00              | 0,00               | -0,61670159 | 0,34875199 | -0,61674117 |
|                   |             |             |             | <b>1,00</b> | <b>22,94</b> | <b>-800,15364</b> | <b>445,643304</b> | <b>-800,204222</b> |             |            |             |

**B3LYP/6-31+G(d,p)**

| Files          | H(0K/hartree) | H(298/hartree) | G(298/hartree) | delta H | delta G | S     | xibrut | xinorm      | Smix         | Hi                 | Si                | Gi                 |
|----------------|---------------|----------------|----------------|---------|---------|-------|--------|-------------|--------------|--------------------|-------------------|--------------------|
| <b>MetH+1</b>  | -800,786617   | -800,77485     | -800,823777    | 0,0     | 0,0     | 431,1 | 1,00   | 0,47        | 2,96         | -373,084068        | 200,835566        | -373,106863        |
| <b>MetH+2</b>  | -800,785745   | -800,773872    | -800,823237    | 2,6     | 1,4     | 434,9 | 0,57   | 0,26        | 2,92         | -211,599335        | 114,926268        | -211,612379        |
| <b>MetH+3</b>  | -800,785608   | -800,773932    | -800,822588    | 2,4     | 3,1     | 428,7 | 0,29   | 0,13        | 2,24         | -107,030606        | 57,2967804        | -107,037109        |
| <b>MetH+4</b>  | -800,785388   | -800,773674    | -800,822554    | 3,1     | 3,2     | 430,7 | 0,28   | 0,13        | 2,20         | -103,276278        | 55,5415182        | -103,282582        |
| <b>MetH+5</b>  | -800,78126    | -800,769356    | -800,819246    | 14,4    | 11,9    | 439,6 | 0,01   | 0,00        | 0,18         | -3,20060776        | 1,75684833        | -3,20080716        |
| <b>MetH+6</b>  | -800,780664   | -800,768647    | -800,819042    | 16,3    | 12,4    | 444,0 | 0,01   | 0,00        | 0,15         | -2,58338106        | 1,43240101        | -2,58354364        |
|                |               |                |                |         |         |       |        | <b>1,00</b> | <b>10,65</b> | <b>-800,774275</b> | <b>431,789382</b> | <b>-800,823284</b> |
| <b>Met-H1</b>  | -799,897337   | -799,885319    | -799,936403    | 0,0     | 0,0     | 450,1 | 1,00   | 0,24        | 2,84         | -189,917901        | 106,860901        | -189,93003         |
| <b>Met-H2</b>  | -799,896773   | -799,884704    | -799,935631    | 1,6     | 2,0     | 448,7 | 0,44   | 0,11        | 1,97         | -84,4227327        | 47,3560931        | -84,4281077        |
| <b>Met-H3</b>  | -799,897319   | -799,885325    | -799,935592    | 0,0     | 2,1     | 442,9 | 0,43   | 0,10        | 1,93         | -81,0348806        | 44,8665827        | -81,039973         |
| <b>Met-H4</b>  | -799,896898   | -799,884843    | -799,935572    | 1,3     | 2,2     | 446,9 | 0,42   | 0,10        | 1,91         | -79,3505266        | 44,3378271        | -79,3555591        |
| <b>Met-H5</b>  | -799,896474   | -799,884408    | -799,935379    | 2,4     | 2,7     | 449,1 | 0,34   | 0,08        | 1,69         | -64,7922463        | 36,3759813        | -64,796375         |
| <b>Met-H6</b>  | -799,896384   | -799,884343    | -799,934768    | 2,6     | 4,3     | 444,3 | 0,18   | 0,04        | 1,12         | -34,1073757        | 18,9436114        | -34,1095259        |
| <b>Met-H7</b>  | -799,895497   | -799,883333    | -799,934783    | 5,2     | 4,3     | 453,3 | 0,18   | 0,04        | 1,13         | -34,6488798        | 19,6355779        | -34,6511085        |
| <b>Met-H8</b>  | -799,895974   | -799,883956    | -799,934744    | 3,6     | 4,4     | 447,5 | 0,18   | 0,04        | 1,10         | -33,2584335        | 18,6050856        | -33,2605452        |
| <b>Met-H9</b>  | -799,895788   | -799,883738    | -799,934531    | 4,2     | 4,9     | 447,5 | 0,14   | 0,03        | 0,94         | -26,5921352        | 14,8773632        | -26,5938238        |
| <b>Met-H10</b> | -799,895872   | -799,883771    | -799,934503    | 4,1     | 5,0     | 447,0 | 0,14   | 0,03        | 0,92         | -25,8215637        | 14,4289057        | -25,8232014        |
| <b>Met-H11</b> | -799,895865   | -799,883774    | -799,934405    | 4,1     | 5,2     | 446,1 | 0,12   | 0,03        | 0,86         | -23,2962021        | 12,9918352        | -23,2976767        |
| <b>Met-H12</b> | -799,895898   | -799,883911    | -799,934093    | 3,7     | 6,1     | 442,1 | 0,09   | 0,02        | 0,67         | -16,7873918        | 9,2789747         | -16,788445         |
| <b>Met-H13</b> | -799,896751   | -799,885022    | -799,934083    | 0,8     | 6,1     | 432,2 | 0,09   | 0,02        | 0,67         | -16,6120362        | 8,97692217        | -16,6130551        |
| <b>Met-H14</b> | -799,895298   | -799,883205    | -799,933967    | 5,6     | 6,4     | 447,2 | 0,08   | 0,02        | 0,61         | -14,7066833        | 8,22285525        | -14,7076166        |
| <b>Met-H15</b> | -799,895548   | -799,883697    | -799,93392     | 4,3     | 6,5     | 442,5 | 0,07   | 0,02        | 0,59         | -13,998403         | 7,7437274         | -13,9992819        |
| <b>Met-H16</b> | -799,895254   | -799,883203    | -799,933884    | 5,6     | 6,6     | 446,5 | 0,07   | 0,02        | 0,57         | -13,4790339        | 7,52442162        | -13,4798879        |
| <b>Met-H17</b> | -799,895527   | -799,883571    | -799,933709    | 4,6     | 7,1     | 441,7 | 0,06   | 0,01        | 0,50         | -11,2161073        | 6,19409899        | -11,2168103        |
| <b>Met-H18</b> | -799,894827   | -799,882684    | -799,933551    | 6,9     | 7,5     | 448,2 | 0,05   | 0,01        | 0,44         | -9,50120074        | 5,32333849        | -9,50180495        |
| <b>Met-H19</b> | -799,895392   | -799,883483    | -799,933387    | 4,8     | 7,9     | 439,7 | 0,04   | 0,01        | 0,38         | -7,99795899        | 4,39626193        | -7,99845798        |
| <b>Met-H20</b> | -799,893932   | -799,881891    | -799,933133    | 9,0     | 8,6     | 451,5 | 0,03   | 0,01        | 0,31         | -6,12533588        | 3,45721091        | -6,12572828        |
| <b>Met-H21</b> | -799,895345   | -799,883689    | -799,933008    | 4,3     | 8,9     | 434,5 | 0,03   | 0,01        | 0,28         | -5,37178814        | 2,91811267        | -5,37211936        |
| <b>Met-H22</b> | -799,894164   | -799,88222     | -799,932519    | 8,2     | 10,2    | 443,2 | 0,02   | 0,00        | 0,18         | -3,21430514        | 1,78080419        | -3,21450727        |
| <b>Met-H23</b> | -799,893395   | -799,881437    | -799,93201     | 10,2    | 11,5    | 445,6 | 0,01   | 0,00        | 0,12         | -1,8833619         | 1,04911389        | -1,88348098        |
| <b>Met-H24</b> | -799,893766   | -799,88187     | -799,931939    | 9,1     | 11,7    | 441,1 | 0,01   | 0,00        | 0,11         | -1,74803931        | 0,96402882        | -1,74814873        |
|                |               |                |                |         |         |       |        | <b>1,00</b> | <b>21,84</b> | <b>-799,884523</b> | <b>447,109635</b> | <b>-799,935271</b> |





|                   |             |             |             |      |       |      |             |              |                    |                   |                    |
|-------------------|-------------|-------------|-------------|------|-------|------|-------------|--------------|--------------------|-------------------|--------------------|
| <b>Met1</b>       | -800,206998 | -800,195095 | -800,244952 | 0,0  | 439,3 | 1,00 | 0,23        | 2,79         | -180,243622        | 98,943193         | -180,254852        |
| <b>Met2</b>       | -800,205648 | -800,193478 | -800,244357 | 4,2  | 448,3 | 0,54 | 0,12        | 2,12         | -96,4899028        | 54,0531723        | -96,4960379        |
| <b>Met3</b>       | -800,205493 | -800,19325  | -800,244439 | 4,8  | 451,0 | 0,58 | 0,13        | 2,22         | -105,167517        | 59,2733049        | -105,174245        |
| <b>MetIlg+g+a</b> | -800,205555 | -800,193401 | -800,244501 | 4,4  | 450,2 | 0,62 | 0,14        | 2,29         | -112,243102        | 63,1511631        | -112,25027         |
| <b>MetIlg+ag-</b> | -800,204137 | -800,192176 | -800,242941 | 7,7  | 447,3 | 0,12 | 0,03        | 0,82         | -21,809672         | 12,1903165        | -21,8110556        |
| <b>Met4</b>       | -800,204742 | -800,192485 | -800,243674 | 6,9  | 451,0 | 0,26 | 0,06        | 1,39         | -47,0942319        | 26,5427339        | -47,0972445        |
| <b>Met5</b>       | -800,206239 | -800,194208 | -800,244109 | 2,3  | 439,6 | 0,41 | 0,09        | 1,84         | -74,3653183        | 40,8582767        | -74,3699558        |
| <b>Met6</b>       | -800,203642 | -800,191526 | -800,242422 | 9,4  | 448,4 | 0,07 | 0,02        | 0,54         | -12,6454685        | 7,0863139         | -12,6462728        |
| <b>Met8</b>       | -800,204973 | -800,193167 | -800,243486 | 5,1  | 443,3 | 0,21 | 0,05        | 1,22         | -38,6564553        | 21,4168182        | -38,6588861        |
| <b>Met11</b>      | -800,205422 | -800,194034 | -800,24228  | 2,8  | 425,1 | 0,06 | 0,01        | 0,49         | -10,8935804        | 5,78671916        | -10,8942372        |
| <b>Met12</b>      | -800,203176 | -800,191461 | -800,241303 | 9,5  | 439,1 | 0,02 | 0,00        | 0,22         | -3,9044817         | 2,14269669        | -3,9047249         |
| <b>Met14</b>      | -800,202422 | -800,19012  | -800,242225 | 13,1 | 459,1 | 0,06 | 0,01        | 0,47         | -10,2821334        | 5,89882089        | -10,282803         |
| <b>Met15</b>      | -800,202882 | -800,191128 | -800,241032 | 10,4 | 439,7 | 0,02 | 0,00        | 0,17         | -2,93738706        | 1,61398153        | -2,93757025        |
| <b>Met16</b>      | -800,203974 | -800,192258 | -800,242122 | 7,4  | 439,3 | 0,05 | 0,01        | 0,43         | -9,22797696        | 5,06634813        | -9,228552          |
| <b>Met17</b>      | -800,203602 | -800,191597 | -800,242093 | 9,2  | 444,9 | 0,05 | 0,01        | 0,42         | -8,95116076        | 4,97666155        | -8,95172562        |
| <b>Met18</b>      | -800,204135 | -800,192207 | -800,242265 | 7,6  | 441,0 | 0,06 | 0,01        | 0,48         | -10,723294         | 5,91021318        | -10,7239648        |
| <b>Met19</b>      | -800,202161 | -800,190157 | -800,241012 | 13,0 | 448,1 | 0,02 | 0,00        | 0,17         | -2,87633012        | 1,6105527         | -2,87651292        |
| <b>Met20</b>      | -800,202478 | -800,190369 | -800,241255 | 12,4 | 448,3 | 0,02 | 0,00        | 0,21         | -3,71253185        | 2,08003643        | -3,71276794        |
| <b>Met21</b>      | -800,203608 | -800,191502 | -800,242382 | 9,4  | 448,3 | 0,07 | 0,02        | 0,53         | -12,1252602        | 6,79266184        | -12,1260312        |
| <b>Met22</b>      | -800,203959 | -800,192016 | -800,241827 | 8,1  | 438,9 | 0,04 | 0,01        | 0,34         | -6,76952242        | 3,71265707        | -6,76994382        |
| <b>Met23</b>      | -800,204397 | -800,193026 | -800,241043 | 5,4  | 423,0 | 0,02 | 0,00        | 0,17         | -2,97152415        | 1,57099674        | -2,97170246        |
| <b>Met24</b>      | -800,204504 | -800,192639 | -800,242397 | 6,4  | 438,4 | 0,07 | 0,02        | 0,53         | -12,3177994        | 6,74834456        | -12,3185653        |
| <b>Met26</b>      | -800,202217 | -800,190059 | -800,242076 | 13,2 | 458,3 | 0,05 | 0,01        | 0,41         | -8,79275332        | 5,03585014        | -8,7933249         |
| <b>Met27</b>      | -800,201383 | -800,189254 | -800,24031  | 15,3 | 449,8 | 0,01 | 0,00        | 0,09         | -1,37612791        | 0,77358605        | -1,37621571        |
| <b>Met28</b>      | -800,202739 | -800,19084  | -800,24123  | 11,2 | 444,0 | 0,02 | 0,00        | 0,20         | -3,6163299         | 2,00638644        | -3,61655763        |
| <b>E-T</b>        |             |             |             |      |       |      | <b>1,00</b> | <b>20,54</b> | <b>-800,193483</b> | <b>445,241805</b> | <b>-800,244019</b> |
| <b>Met7</b>       | -800,202723 | -800,19132  | -800,240157 | 9,9  | 448,3 | 0,02 | 0,00        | 0,20         | -3,6163299         | 2,00638644        | -3,61655763        |
| <b>Met9</b>       | -800,205244 | -800,194406 | -800,242204 | 1,8  | 448,3 | 0,02 | 0,00        | 0,20         | -3,6163299         | 2,00638644        | -3,61655763        |
| <b>Met10</b>      | -800,204666 | -800,193936 | -800,240458 | 3,0  | 448,3 | 0,02 | 0,00        | 0,20         | -3,6163299         | 2,00638644        | -3,61655763        |
| <b>Met13</b>      | -800,202861 | -800,191549 | -800,23985  | 9,3  | 448,3 | 0,02 | 0,00        | 0,20         | -3,6163299         | 2,00638644        | -3,61655763        |
| <b>Met29</b>      | -800,201213 | -800,190056 | -800,238151 | 13,2 | 448,3 | 0,02 | 0,00        | 0,20         | -3,6163299         | 2,00638644        | -3,61655763        |
| <b>Met25</b>      | -800,204911 | -800,193978 | -800,240968 | 2,9  | 448,3 | 0,02 | 0,00        | 0,20         | -3,6163299         | 2,00638644        | -3,61655763        |
| <b>MIlg+g+a</b>   | -800,205148 | -800,19426  | -800,241473 | 2,2  | 448,3 | 0,02 | 0,00        | 0,20         | -3,6163299         | 2,00638644        | -3,61655763        |

**CBS-QB3**

| Files          | H(0K/hartree)      | H(298/hartree)     | G(298/hartree)     | delta H    | delta G    | S            | xibrut      | xinorm      | Smix         | Hi                 | Si                | Gi                 |
|----------------|--------------------|--------------------|--------------------|------------|------------|--------------|-------------|-------------|--------------|--------------------|-------------------|--------------------|
| <b>MetH+1</b>  | -799,816553        | -799,804765        | -799,853599        | 0,0        | 0,0        | 430,2        | 1,00        | 0,35        | 3,06         | -280,204061        | 150,733053        | -280,221169        |
| <b>MetH+2</b>  | -799,815223        | -799,803338        | -799,852585        | 3,7        | 2,7        | 433,9        | 0,34        | 0,12        | 2,12         | -96,6033619        | 52,4064288        | -96,6093101        |
| <b>MetH+3</b>  | -799,816426        | -799,804697        | -799,85352         | 0,2        | 0,2        | 430,2        | 0,92        | 0,32        | 3,03         | -257,894927        | 138,700833        | -257,91067         |
| <b>MetH+4</b>  | -799,815735        | -799,803982        | -799,85308         | 2,1        | 1,4        | 432,6        | 0,58        | 0,20        | 2,69         | -162,465122        | 87,8690924        | -162,475096        |
| <b>MetH+5</b>  | -799,810875        | -799,798921        | -799,848809        | 15,3       | 12,6       | 439,5        | 0,01        | 0,00        | 0,12         | -1,83134894        | 1,00642668        | -1,83146317        |
| <b>MetH+6</b>  | -799,809746        | -799,797692        | -799,848027        | 18,6       | 14,6       | 443,5        | 0,00        | 0,00        | 0,06         | -0,80557005        | 0,44667227        | -0,80562075        |
|                |                    |                    |                    |            |            |              |             | <b>1,00</b> | <b>11,08</b> | <b>-799,804391</b> | <b>431,162506</b> | <b>-799,853329</b> |
| <b>Met-H1</b>  | -798,928125        | -798,916205        | -798,966544        | 0,0        | 0,0        | 443,5        | 1,00        | 0,36        | 3,06         | -290,855805        | 161,464424        | -290,874131        |
| <b>Met-H2</b>  | -798,925908        | -798,914027        | -798,964035        | 5,7        | 6,6        | 440,6        | 0,07        | 0,03        | 0,79         | -20,8608271        | 11,5044728        | -20,8621329        |
| <b>Met-H3</b>  | -798,926665        | -798,914705        | -798,964721        | 3,9        | 4,8        | 440,7        | 0,15        | 0,05        | 1,31         | -42,8759537        | 23,6492893        | -42,878638         |
| <b>Met-H4</b>  | -798,926174        | -798,914207        | -798,964373        | 5,2        | 5,7        | 442,0        | 0,10        | 0,04        | 1,02         | -29,7503509        | 16,4587626        | -29,752219         |
| <b>Met-H5</b>  | -798,926088        | -798,914293        | -798,963782        | 5,0        | 7,3        | 436,0        | 0,05        | 0,02        | 0,65         | -15,9933472        | 8,72858028        | -15,9943379        |
| <b>Met-H6</b>  | -798,925758        | -798,913811        | -798,963685        | 6,3        | 7,5        | 439,4        | 0,05        | 0,02        | 0,60         | -14,4443427        | 7,94452278        | -14,4452444        |
| <b>Met-H8</b>  | -798,926916        | -798,914996        | -798,965226        | 3,2        | 3,5        | 442,5        | 0,25        | 0,09        | 1,82         | -72,8689421        | 40,3646163        | -72,8735236        |
| <b>Met-H9</b>  | -798,926303        | -798,914399        | -798,964604        | 4,7        | 5,1        | 442,3        | 0,13        | 0,05        | 1,20         | -37,9184335        | 20,9938877        | -37,9208164        |
| <b>Met-H10</b> | -798,924986        | -798,912926        | -798,963424        | 8,6        | 8,2        | 444,9        | 0,04        | 0,01        | 0,49         | -10,9813626        | 6,11542605        | -10,9820567        |
| <b>Met-H11</b> | -798,925483        | -798,913407        | -798,963918        | 7,3        | 6,9        | 445,0        | 0,06        | 0,02        | 0,72         | -18,4487926        | 10,2766121        | -18,449959         |
| <b>Met-H12</b> | -798,925828        | -798,913832        | -798,964053        | 6,2        | 6,5        | 442,5        | 0,07        | 0,03        | 0,80         | -21,2589176        | 11,7739537        | -21,2602539        |
| <b>Met-H13</b> | -798,927735        | -798,916119        | -798,964816        | 0,2        | 4,5        | 429,0        | 0,16        | 0,06        | 1,39         | -47,3743963        | 25,4413686        | -47,3772839        |
| <b>Met-H14</b> | -798,924762        | -798,91274         | -798,96304         | 9,1        | 9,2        | 443,2        | 0,03        | 0,01        | 0,36         | -7,33694461        | 4,06986157        | -7,33740655        |
| <b>Met-H15</b> | -798,926218        | -798,914685        | -798,963118        | 4,0        | 9,0        | 426,7        | 0,03        | 0,01        | 0,38         | -7,96327641        | 4,25332448        | -7,96375917        |
| <b>Met-H16</b> | -798,924741        | -798,912765        | -798,962991        | 9,0        | 9,3        | 442,5        | 0,02        | 0,01        | 0,34         | -6,96893713        | 3,86003762        | -6,96937526        |
| <b>Met-H17</b> | -798,92541         | -798,913505        | -798,963304        | 7,1        | 8,5        | 438,7        | 0,03        | 0,01        | 0,44         | -9,68110694        | 5,31669363        | -9,68171039        |
| <b>Met-H18</b> | -798,924104        | -798,912014        | -798,962528        | 11,0       | 10,5       | 445,0        | 0,01        | 0,01        | 0,23         | -4,28542265        | 2,38727377        | -4,28569361        |
| <b>Met-H19</b> | <b>-798,927536</b> | <b>-798,915732</b> | <b>-798,965364</b> | <b>1,2</b> | <b>3,1</b> | <b>437,3</b> | <b>0,29</b> | <b>0,11</b> | <b>1,97</b>  | <b>-84,2333594</b> | <b>46,1042204</b> | <b>-84,2385923</b> |
| <b>Met-H20</b> | -798,92497         | -798,913           | -798,963135        | 8,4        | 9,0        | 441,7        | 0,03        | 0,01        | 0,39         | -8,10670758        | 4,48210264        | -8,10721631        |
| <b>Met-H21</b> | -798,926921        | -798,915387        | -798,963855        | 2,1        | 7,1        | 427,0        | 0,06        | 0,02        | 0,69         | -17,267719         | 9,229646          | -17,2687666        |
| <b>Met-H22</b> | -798,925502        | -798,913517        | -798,964088        | 7,1        | 6,4        | 445,6        | 0,08        | 0,03        | 0,82         | -22,0548617        | 12,2999082        | -22,0562578        |
| <b>Met-H23</b> | -798,923389        | -798,911457        | -798,961793        | 12,5       | 12,5       | 443,5        | 0,01        | 0,00        | 0,12         | -1,98044484        | 1,09935653        | -1,98056962        |
| <b>Met-H24</b> | -798,924641        | -798,912763        | -798,962749        | 9,0        | 10,0       | 440,4        | 0,02        | 0,01        | 0,28         | -5,40494524        | 2,97944987        | -5,40528341        |
| <b>Met-H7</b>  | <b>-798,927547</b> | <b>-798,915735</b> | <b>-798,965415</b> | <b>1,2</b> | <b>3,0</b> |              |             | <b>1,00</b> | <b>19,89</b> | <b>-798,915196</b> | <b>440,797791</b> | <b>-798,965228</b> |

|                  |             |             |             |      |       |      |             |              |                    |                   |                   |
|------------------|-------------|-------------|-------------|------|-------|------|-------------|--------------|--------------------|-------------------|-------------------|
| <b>Met1</b>      | -799,462681 | -799,450419 | -799,501352 | 0,0  | 448,7 | 1,00 | 0,43        | 3,01         | -346,495988        | 194,491977        | -346,518063       |
| <b>Met2</b>      | -799,461113 | -799,448754 | -799,499789 | 4,4  | 449,6 | 0,19 | 0,08        | 1,73         | -67,1149322        | 37,7478659        | -67,1192167       |
| <b>Met3</b>      | -799,460931 | -799,448593 | -799,499547 | 4,8  | 448,9 | 0,15 | 0,07        | 1,48         | -52,0527671        | 29,2298993        | -52,0560847       |
| <b>Met1g+g+a</b> | -799,461103 | -799,448815 | -799,499725 | 4,2  | 448,5 | 0,18 | 0,08        | 1,66         | -62,7522123        | 35,2076658        | -62,7562084       |
| <b>Met1l+g+a</b> | -799,460136 | -799,448225 | -799,498237 | 5,8  | 440,6 | 0,04 | 0,02        | 0,56         | -13,1509697        | 7,24832094        | -13,1517924       |
| <b>Met4</b>      | -799,460473 | -799,448048 | -799,499419 | 6,2  | 452,6 | 0,13 | 0,06        | 1,36         | -45,5054306        | 25,7624262        | -45,5083547       |
| <b>Met5</b>      | -799,460893 | -799,448629 | -799,49924  | 4,7  | 445,9 | 0,11 | 0,05        | 1,20         | -37,7070319        | 21,0316073        | -37,7094191       |
| <b>Met6</b>      | -799,45882  | -799,446459 | -799,498519 | 10,4 | 458,7 | 0,05 | 0,02        | 0,70         | -17,6838127        | 10,1458035        | -17,6849643       |
| <b>Met7</b>      | -799,458477 | -799,444598 | -799,498633 | 11,7 | 463,9 | 0,06 | 0,02        | 0,77         | -19,9329051        | 11,5664572        | -19,9342179       |
| <b>Met8</b>      | -799,459989 | -799,448117 | -799,497821 | 6,0  | 437,9 | 0,02 | 0,01        | 0,40         | -8,49614184        | 4,65391631        | -8,49667007       |
| <b>Met9</b>      | -799,460655 | -799,448943 | -799,498232 | 3,9  | 434,3 | 0,04 | 0,02        | 0,56         | -13,0821067        | 7,10612297        | -13,0829132       |
| <b>Met10</b>     | -799,460472 | -799,448756 | -799,497924 | 4,4  | 433,2 | 0,03 | 0,01        | 0,44         | -9,46673012        | 5,1296492         | -9,46731234       |
| <b>Met11</b>     | -799,460955 | -799,449351 | -799,497999 | 2,8  | 428,6 | 0,03 | 0,01        | 0,46         | -10,2425366        | 5,49132716        | -10,2431599       |
| <b>Met12</b>     | -799,458777 | -799,446873 | -799,497114 | 9,3  | 442,6 | 0,01 | 0,01        | 0,22         | -4,04353457        | 2,23885303        | -4,04378869       |
| <b>Met13</b>     | -799,45829  | -799,445891 | -799,497736 | 11,9 | 456,8 | 0,02 | 0,01        | 0,37         | -7,7705611         | 4,43982592        | -7,77106503       |
| <b>Met14</b>     | -799,45799  | -799,445542 | -799,497393 | 12,8 | 456,8 | 0,02 | 0,01        | 0,28         | -5,42014918        | 3,09724278        | -5,42050072       |
| <b>Met15</b>     | -799,458248 | -799,44629  | -799,496352 | 10,8 | 441,1 | 0,01 | 0,00        | 0,11         | -1,81641735        | 1,0021444         | -1,8165311        |
| <b>Met16</b>     | -799,459435 | -799,447603 | -799,497248 | 7,4  | 437,4 | 0,01 | 0,01        | 0,25         | -4,65455782        | 2,54659393        | -4,65484687       |
| <b>Met17</b>     | -799,458102 | -799,44593  | -799,496726 | 11,8 | 447,5 | 0,01 | 0,00        | 0,16         | -2,69026694        | 1,50602282        | -2,69043788       |
| <b>Met18</b>     | -799,459762 | -799,447525 | -799,498188 | 7,6  | 446,4 | 0,04 | 0,02        | 0,54         | -12,4913302        | 6,97437649        | -12,4921218       |
| <b>Met19</b>     | -799,457511 | -799,445482 | -799,495814 | 13,0 | 443,4 | 0,00 | 0,00        | 0,07         | -1,03237034        | 0,57264651        | -1,03243534       |
| <b>Met20</b>     | -799,457951 | -799,445585 | -799,497117 | 12,7 | 454,0 | 0,01 | 0,01        | 0,22         | -4,05628769        | 2,30362932        | -4,05654915       |
| <b>Met21</b>     | -799,459244 | -799,446942 | -799,497866 | 9,1  | 448,7 | 0,03 | 0,01        | 0,42         | -8,90728686        | 4,99889554        | -8,90785424       |
| <b>Met22</b>     | -799,459458 | -799,44719  | -799,497892 | 8,5  | 446,7 | 0,03 | 0,01        | 0,43         | -9,1538559         | 5,11487636        | -9,15443645       |
| <b>Met23</b>     | -799,459467 | -799,447704 | -799,497033 | 7,1  | 434,6 | 0,01 | 0,00        | 0,21         | -3,71379418        | 2,01895129        | -3,71402333       |
| <b>Met24</b>     | -799,459294 | -799,447025 | -799,498338 | 8,9  | 452,1 | 0,04 | 0,02        | 0,61         | -14,6225403        | 8,269063          | -14,6234788       |
| <b>Met25</b>     | -799,459692 | -799,447844 | -799,497159 | 6,8  | 434,5 | 0,01 | 0,01        | 0,23         | -4,23922054        | 2,30393738        | -4,23948204       |
| <b>Met26</b>     | -799,458134 | -799,445828 | -799,496894 | 12,1 | 449,9 | 0,01 | 0,00        | 0,18         | -3,20936756        | 1,80616748        | -3,20957257       |
| <b>Met27</b>     | -799,45781  | -799,445427 | -799,496691 | 13,1 | 451,7 | 0,01 | 0,00        | 0,15         | -2,59317448        | 1,46504568        | -2,59334077       |
| <b>Met28</b>     | -799,458246 | -799,446027 | -799,49679  | 11,5 | 447,2 | 0,01 | 0,00        | 0,17         | -2,87730285        | 1,6096797         | -2,87748555       |
| <b>Met29</b>     | -799,457491 | -799,445169 | -799,496646 | 13,8 | 453,5 | 0,01 | 0,00        | 0,15         | -2,47347358        | 1,40322587        | -2,47363285       |
|                  |             |             |             |      |       |      | <b>1,00</b> | <b>19,11</b> | <b>-799,449056</b> | <b>448,484217</b> | <b>-799,49996</b> |

**G3B3**

| Files          | H(0K/hartree) | H(298/hartree) | G(298/hartree) | delta H | delta G | S     | xibrut | xinorm      | Smix         | Hi                 | Si                | Gi                 |
|----------------|---------------|----------------|----------------|---------|---------|-------|--------|-------------|--------------|--------------------|-------------------|--------------------|
| <b>Meth+1</b>  | -800,483281   | -800,471271    | -800,520582    | 0,0     | 0,0     | 434,4 | 1,00   | 0,32        | 3,03         | -255,517099        | 138,679986        | -255,53284         |
| <b>Meth+2</b>  | -800,48214    | -800,470028    | -800,519765    | 3,3     | 2,1     | 438,2 | 0,42   | 0,14        | 2,25         | -108,339995        | 59,3087921        | -108,346726        |
| <b>Meth+3</b>  | -800,48318    | -800,47123     | -800,520548    | 0,1     | 0,1     | 434,5 | 0,96   | 0,31        | 3,02         | -246,554356        | 133,834527        | -246,569547        |
| <b>Meth+4</b>  | -800,482662   | -800,47066     | -800,520286    | 1,6     | 0,8     | 437,2 | 0,73   | 0,23        | 2,83         | -187,247144        | 102,276254        | -187,258753        |
| <b>Meth+5</b>  | -800,477709   | -800,46552     | -800,515825    | 15,1    | 12,5    | 443,2 | 0,01   | 0,00        | 0,11         | -1,72889201        | 0,95726493        | -1,72900066        |
| <b>Meth+6</b>  | -800,476858   | -800,464569    | -800,51538     | 17,6    | 13,7    | 447,7 | 0,00   | 0,00        | 0,07         | -1,08343935        | 0,60592098        | -1,08350812        |
|                |               |                |                |         |         |       |        | <b>1,00</b> | <b>11,31</b> | <b>-800,470926</b> | <b>435,662745</b> | <b>-800,520374</b> |
| <b>Met-H1</b>  | -799,592649   | -799,580568    | -799,631161    | 0,0     | 0,0     | 445,7 | 1,00   | 0,40        | 3,04         | -323,268669        | 180,213605        | -323,289123        |
| <b>Met-H2</b>  | -799,591381   | -799,579192    | -799,630147    | 3,6     | 2,7     | 448,9 | 0,34   | 0,14        | 2,28         | -111,450355        | 62,5752421        | -111,457458        |
| <b>Met-H3</b>  | -799,591123   | -799,578982    | -799,62943     | 4,2     | 4,5     | 444,5 | 0,16   | 0,07        | 1,49         | -52,4880532        | 29,1768772        | -52,4913649        |
| <b>Met-H4</b>  | -799,590631   | -799,57848     | -799,629087    | 5,5     | 5,4     | 445,9 | 0,11   | 0,05        | 1,17         | -36,611645         | 20,4157104        | -36,6139622        |
| <b>Met-H5</b>  | -799,590278   | -799,578375    | -799,628053    | 5,8     | 8,2     | 437,7 | 0,04   | 0,02        | 0,54         | -12,3599255        | 6,76573021        | -12,3606935        |
| <b>Met-H6</b>  | -799,59022    | -799,578075    | -799,628477    | 6,5     | 7,0     | 444,1 | 0,06   | 0,02        | 0,75         | -19,2930292        | 10,7147755        | -19,2942454        |
| <b>Met-H8</b>  | -799,591275   | -799,579248    | -799,629453    | 3,5     | 4,5     | 442,3 | 0,17   | 0,07        | 1,51         | -53,771335         | 29,7462371        | -53,7747113        |
| <b>Met-H10</b> | -799,589386   | -799,577163    | -799,628012    | 8,9     | 8,3     | 448,0 | 0,04   | 0,01        | 0,52         | -11,8390064        | 6,6333521         | -11,8397593        |
| <b>Met-H11</b> | -799,589913   | -799,577711    | -799,628393    | 7,5     | 7,3     | 446,5 | 0,05   | 0,02        | 0,70         | -17,6639634        | 9,86454321        | -17,665083         |
| <b>Met-H12</b> | -799,590298   | -799,578147    | -799,628744    | 6,4     | 6,3     | 445,8 | 0,08   | 0,03        | 0,91         | -25,5374842        | 14,2376306        | -25,5391002        |
| <b>Met-H13</b> | -799,591892   | -799,580204    | -799,628886    | 1,0     | 6,0     | 428,9 | 0,09   | 0,04        | 1,02         | -29,6445505        | 15,9018264        | -29,6463554        |
| <b>Met-H14</b> | -799,589159   | -799,576992    | -799,62763     | 9,4     | 9,3     | 446,1 | 0,02   | 0,01        | 0,38         | -7,92659132        | 4,42281202        | -7,92709332        |
| <b>Met-H15</b> | -799,590381   | -799,578736    | -799,627186    | 4,8     | 10,4    | 426,9 | 0,02   | 0,01        | 0,26         | -4,972566836       | 2,65466098        | -4,97286967        |
| <b>Met-H16</b> | -799,588982   | -799,57684     | -799,627464    | 9,8     | 9,7     | 446,0 | 0,02   | 0,01        | 0,33         | -6,65846986        | 3,71420994        | -6,65889143        |
| <b>Met-H17</b> | -799,589657   | -799,577583    | -799,627825    | 7,8     | 8,8     | 442,7 | 0,03   | 0,01        | 0,45         | -9,72804388        | 5,38551933        | -9,72865515        |
| <b>Met-H18</b> | -799,58845    | -799,576211    | -799,627067    | 11,4    | 10,7    | 448,1 | 0,01   | 0,01        | 0,24         | -4,38837729        | 2,45913319        | -4,3886564         |
| <b>Met-H19</b> | -799,591312   | -799,579425    | -799,628981    | 3,0     | 5,7     | 436,6 | 0,10   | 0,04        | 1,09         | -32,754696         | 17,8856186        | -32,756726         |
| <b>Met-H20</b> | -799,58938    | -799,57727     | -799,627646    | 8,7     | 9,2     | 443,8 | 0,02   | 0,01        | 0,39         | -8,06091154        | 4,47448601        | -8,06141941        |
| <b>Met-H21</b> | -799,591072   | -799,579427    | -799,628234    | 3,0     | 7,7     | 430,0 | 0,05   | 0,02        | 0,62         | -14,9475431        | 8,03870468        | -14,9484555        |
| <b>Met-H22</b> | -799,589131   | -799,576964    | -799,627625    | 9,5     | 9,3     | 446,3 | 0,02   | 0,01        | 0,38         | -7,8850776         | 4,40164705        | -7,8855772         |
| <b>Met-H23</b> | -799,5879     | -799,575761    | -799,626649    | 12,6    | 11,8    | 448,3 | 0,01   | 0,00        | 0,17         | -2,8291473         | 1,58637947        | -2,82932735        |
| <b>Met-H24</b> | -799,589007   | -799,576961    | -799,627282    | 9,5     | 10,2    | 443,3 | 0,02   | 0,01        | 0,28         | -5,50002951        | 3,04964839        | -5,50037566        |
| <b>Met-H7</b>  | -799,58938    | -799,57727     | -799,627647    | 8,7     | 9,2     | 443,3 | 0,02   | 0,01        | 18,51        | -799,579472        | 444,31835         | -799,629904        |
| <b>E-T</b>     |               |                |                |         |         |       |        | <b>1,00</b> | <b>18,51</b> | <b>-799,579472</b> | <b>444,31835</b>  | <b>-799,629904</b> |





**G4MP2**

| Files          | H(0K/hartree)      | H(298/hartree)     | G(298/hartree)     | delta H    | delta G    | S     | xibrut      | xinorm      | Smix         | Hi                 | Si                | Gi                 |
|----------------|--------------------|--------------------|--------------------|------------|------------|-------|-------------|-------------|--------------|--------------------|-------------------|--------------------|
| <b>MetH+1</b>  | -799,945016        | -799,933205        | -799,98202         | 0,0        | 0,0        | 430,1 | 1,00        | 0,36        | 3,06         | -290,049819        | 155,943733        | -290,067518        |
| <b>MetH+2</b>  | -799,943844        | -799,931936        | -799,981159        | 3,3        | 2,3        | 433,7 | 0,40        | 0,15        | 2,34         | -117,428415        | 63,6625455        | -117,43564         |
| <b>MetH+3</b>  | -799,944659        | -799,93289         | -799,981787        | 0,8        | 0,6        | 430,8 | 0,78        | 0,28        | 2,97         | -227,092109        | 122,300002        | -227,10599         |
| <b>MetH+4</b>  | -799,944097        | -799,93229         | -799,981464        | 2,4        | 1,5        | 433,2 | 0,56        | 0,20        | 2,69         | -161,764302        | 87,6114275        | -161,774246        |
| <b>MetH+5</b>  | -799,93944         | -799,927418        | -799,977404        | 15,2       | 12,1       | 440,4 | 0,01        | 0,00        | 0,14         | -2,27577866        | 1,25292069        | -2,27592087        |
| <b>MetH+6</b>  | -799,938527        | -799,926402        | -799,976887        | 17,9       | 13,5       | 444,8 | 0,00        | 0,00        | 0,09         | -1,32229332        | 0,73525145        | -1,32237677        |
|                |                    |                    |                    |            |            |       | <b>1,00</b> | <b>1,00</b> | <b>11,29</b> | <b>-799,932717</b> | <b>431,50588</b>  | <b>-799,981693</b> |
| <b>Met-H1</b>  | -799,053693        | -799,041776        | -799,091957        | 0,0        | 0,0        | 442,1 | 1,00        | 0,33        | 3,04         | -261,112618        | 144,475246        | -261,129016        |
| <b>Met-H2</b>  | -799,050622        | -799,038827        | -799,088198        | 7,7        | 9,9        | 435,0 | 0,02        | 0,01        | 0,27         | -5,03919481        | 2,74322195        | -5,03950618        |
| <b>Met-H3</b>  | -799,052468        | -799,040501        | -799,090574        | 3,3        | 3,6        | 441,2 | 0,23        | 0,08        | 1,63         | -61,1007172        | 33,7347026        | -61,1045462        |
| <b>Met-H4</b>  | -799,052111        | -799,04006         | -799,090634        | 4,5        | 3,5        | 445,6 | 0,25        | 0,08        | 1,70         | -65,0746487        | 36,2882765        | -65,0787675        |
| <b>Met-H5</b>  | -799,051376        | -799,039636        | -799,088896        | 5,6        | 8,0        | 434,0 | 0,04        | 0,01        | 0,47         | -10,4885787        | 5,69689854        | -10,4892253        |
| <b>Met-H6</b>  | -799,05151         | -799,039549        | -799,089512        | 5,8        | 6,4        | 440,2 | 0,08        | 0,03        | 0,77         | -20,0295767        | 11,0343755        | -20,0308291        |
| <b>Met-H8</b>  | -799,052387        | -799,040527        | -799,090308        | 3,3        | 4,3        | 438,6 | 0,18        | 0,06        | 1,37         | -46,2088084        | 25,3638594        | -46,2116872        |
| <b>Met-H9</b>  | -799,051831        | -799,039931        | -799,089994        | 4,8        | 5,2        | 441,1 | 0,13        | 0,04        | 1,10         | -33,2284651        | 18,3423268        | -33,230547         |
| <b>Met-H10</b> | -799,050873        | -799,038781        | -799,089412        | 7,9        | 6,7        | 446,1 | 0,07        | 0,02        | 0,71         | -18,032741         | 10,067141         | -18,0338837        |
| <b>Met-H11</b> | -799,050873        | -799,038763        | -799,089553        | 7,9        | 6,3        | 447,5 | 0,08        | 0,03        | 0,79         | -20,9108305        | 11,710553         | -20,9121597        |
| <b>Met-H12</b> | -799,051259        | -799,0392          | -799,089929        | 6,8        | 5,3        | 446,9 | 0,12        | 0,04        | 1,05         | -31,0358497        | 17,3599158        | -31,03782          |
| <b>Met-H13</b> | -799,052875        | -799,04133         | -799,089691        | 1,2        | 5,9        | 426,1 | 0,09        | 0,03        | 0,88         | -24,172075         | 12,8894896        | -24,173538         |
| <b>Met-H14</b> | -799,050517        | -799,038502        | -799,088821        | 8,6        | 8,2        | 443,3 | 0,04        | 0,01        | 0,45         | -9,69412957        | 5,37859537        | -9,69474005        |
| <b>Met-H15</b> | -799,051474        | -799,039979        | -799,088129        | 4,7        | 10,1       | 424,2 | 0,02        | 0,01        | 0,25         | -4,68695891        | 2,48836845        | -4,68724134        |
| <b>Met-H16</b> | -799,05035         | -799,038342        | -799,088731        | 9,0        | 8,5        | 443,9 | 0,03        | 0,01        | 0,41         | -8,81982742        | 4,90031464        | -8,82038362        |
| <b>Met-H17</b> | -799,051032        | -799,03907         | -799,089173        | 7,1        | 7,3        | 441,4 | 0,05        | 0,02        | 0,59         | -14,0299119        | 7,75079799        | -14,0307916        |
| <b>Met-H18</b> | -799,049799        | -799,037741        | -799,088131        | 10,6       | 10,0       | 444,0 | 0,02        | 0,01        | 0,25         | -4,69680059        | 2,60960602        | -4,69709678        |
| <b>Met-H19</b> | <b>-799,052858</b> | <b>-799,041066</b> | <b>-799,091239</b> | <b>1,9</b> | <b>1,9</b> | 442,0 | 0,47        | 0,15        | 2,39         | -122,843024        | 67,9590387        | -122,850737        |
| <b>Met-H20</b> | -799,050601        | -799,038663        | -799,088691        | 8,2        | 8,6        | 440,8 | 0,03        | 0,01        | 0,40         | -8,45700173        | 4,66506313        | -8,45753122        |
| <b>Met-H21</b> | -799,052001        | -799,040523        | -799,088954        | 3,3        | 7,9        | 426,7 | 0,04        | 0,01        | 0,50         | -11,1473258        | 5,95279717        | -11,1480015        |
| <b>Met-H22</b> | -799,050446        | -799,038398        | -799,088887        | 8,9        | 8,1        | 444,8 | 0,04        | 0,01        | 0,47         | -10,3898937        | 5,78410251        | -10,3905502        |
| <b>Met-H23</b> | -799,049265        | -799,037297        | -799,087755        | 11,8       | 11,0       | 444,6 | 0,01        | 0,00        | 0,18         | -3,16453396        | 1,76063163        | -3,16473379        |
| <b>Met-H24</b> | -799,049894        | -799,037986        | -799,088127        | 10,0       | 10,1       | 441,8 | 0,02        | 0,01        | 0,25         | -4,67711309        | 2,58582538        | -4,67740658        |
| <b>Met-H7</b>  | <b>-799,052859</b> | <b>-799,041067</b> | <b>-799,091235</b> | <b>1,9</b> | <b>1,9</b> |       |             | <b>1,00</b> | <b>19,92</b> | <b>-799,040624</b> | <b>441,541148</b> | <b>-799,09074</b>  |

|                   |             |             |             |      |      |       |      |             |              |                    |                   |                    |
|-------------------|-------------|-------------|-------------|------|------|-------|------|-------------|--------------|--------------------|-------------------|--------------------|
| <b>Met1</b>       | -799,590334 | -799,578015 | -799,629046 | 0,0  | 0,0  | 449,6 | 1,00 | 0,39        | 3,05         | -311,967842        | 175,419885        | -311,987752        |
| <b>Met2</b>       | -799,589024 | -799,576593 | -799,627846 | 3,7  | 3,2  | 451,6 | 0,28 | 0,11        | 2,03         | -88,4695418        | 49,9630285        | -88,4752127        |
| <b>Met3</b>       | -799,588758 | -799,576364 | -799,627476 | 4,3  | 4,1  | 450,3 | 0,19 | 0,08        | 1,62         | -59,9843711        | 33,7828897        | -59,9882055        |
| <b>MetIlg+g+a</b> | -799,588853 | -799,576511 | -799,627556 | 3,9  | 3,9  | 449,7 | 0,21 | 0,08        | 1,70         | -65,241791         | 36,6956693        | -65,245956         |
| <b>MetIlg+g+a</b> | -799,58775  | -799,575741 | -799,626113 | 6,0  | 7,7  | 443,8 | 0,05 | 0,02        | 0,60         | -14,3343774        | 7,95617228        | -14,3352804        |
| <b>MetIlg+ag-</b> | -799,586978 | -799,574878 | -799,625268 | 8,2  | 9,9  | 444,0 | 0,02 | 0,01        | 0,30         | -5,90170084        | 3,27686212        | -5,90207277        |
| <b>Met4</b>       | -799,588355 | -799,57587  | -799,627367 | 5,6  | 4,4  | 453,7 | 0,17 | 0,07        | 1,50         | -53,4962537        | 30,3557788        | -53,4996992        |
| <b>Met5</b>       | -799,588552 | -799,576224 | -799,62703  | 4,7  | 5,3  | 447,6 | 0,12 | 0,05        | 1,19         | -37,5507995        | 21,0218087        | -37,5531856        |
| <b>Met6</b>       | -799,586713 | -799,574295 | -799,62638  | 9,8  | 7,0  | 458,9 | 0,06 | 0,02        | 0,74         | -18,9738603        | 10,8894339        | -18,9750963        |
| <b>Met7</b>       | -799,586443 | -799,573905 | -799,626476 | 10,8 | 6,7  | 463,2 | 0,07 | 0,03        | 0,79         | -20,9865335        | 12,156935         | -20,9879133        |
| <b>Met8</b>       | -799,587207 | -799,57532  | -799,624961 | 7,1  | 10,7 | 437,4 | 0,01 | 0,01        | 0,23         | -4,27519511        | 2,33847558        | -4,27546053        |
| <b>Met9</b>       | -799,587863 | -799,576086 | -799,625494 | 5,1  | 9,3  | 435,3 | 0,02 | 0,01        | 0,36         | -7,48265218        | 4,07369767        | -7,48311455        |
| <b>Met10</b>      | -799,587922 | -799,576109 | -799,625514 | 5,0  | 9,3  | 435,3 | 0,02 | 0,01        | 0,37         | -7,64148019        | 4,15991393        | -7,64195235        |
| <b>Met11</b>      | -799,588077 | -799,576368 | -799,62534  | 4,3  | 9,7  | 431,5 | 0,02 | 0,01        | 0,32         | -6,36527127        | 3,43479298        | -6,36566113        |
| <b>Met12</b>      | -799,586225 | -799,57424  | -799,624725 | 9,9  | 11,3 | 444,8 | 0,01 | 0,00        | 0,19         | -3,33669631        | 1,85616255        | -3,33690699        |
| <b>Met13</b>      | -799,586104 | -799,573615 | -799,625975 | 11,6 | 8,1  | 461,3 | 0,04 | 0,02        | 0,54         | -12,4004208        | 7,15440243        | -12,4012328        |
| <b>Met14</b>      | -799,585828 | -799,573334 | -799,625336 | 12,3 | 9,7  | 458,2 | 0,02 | 0,01        | 0,32         | -6,33856408        | 3,63202131        | -6,33897632        |
| <b>Met15</b>      | -799,585805 | -799,573784 | -799,624019 | 11,1 | 13,2 | 442,6 | 0,01 | 0,00        | 0,10         | -1,58969062        | 0,87994642        | -1,5897905         |
| <b>Met16</b>      | -799,586886 | -799,574982 | -799,624782 | 8,0  | 11,2 | 438,8 | 0,01 | 0,00        | 0,20         | -3,54253835        | 1,94392929        | -3,54275899        |
| <b>Met17</b>      | -799,585485 | -799,573294 | -799,624027 | 12,4 | 13,2 | 447,0 | 0,01 | 0,00        | 0,10         | -1,60310185        | 0,89616739        | -1,60320356        |
| <b>Met18</b>      | -799,587379 | -799,575065 | -799,625961 | 7,7  | 8,1  | 448,4 | 0,04 | 0,02        | 0,53         | -12,2194558        | 6,85286275        | -12,2202336        |
| <b>Met19</b>      | -799,585134 | -799,573035 | -799,623535 | 13,1 | 14,5 | 444,9 | 0,00 | 0,00        | 0,07         | -0,95622856        | 0,53209687        | -0,95628895        |
| <b>Met20</b>      | -799,585807 | -799,573364 | -799,625386 | 12,2 | 9,6  | 458,3 | 0,02 | 0,01        | 0,33         | -6,68029597        | 3,82930704        | -6,68073061        |
| <b>Met21</b>      | -799,586885 | -799,574522 | -799,625622 | 9,2  | 9,0  | 450,2 | 0,03 | 0,01        | 0,40         | -8,55923607        | 4,81939715        | -8,55978308        |
| <b>Met22</b>      | -799,587051 | -799,574719 | -799,625594 | 8,7  | 9,1  | 448,2 | 0,03 | 0,01        | 0,39         | -8,31121318        | 4,65913773        | -8,311742          |
| <b>Met23</b>      | -799,586762 | -799,574945 | -799,624419 | 8,1  | 12,1 | 435,9 | 0,01 | 0,00        | 0,15         | -2,41964509        | 1,3190622         | -2,4197948         |
| <b>Met24</b>      | -799,586695 | -799,574613 | -799,626332 | 8,9  | 7,1  | 455,7 | 0,06 | 0,02        | 0,71         | -18,0411102        | 10,2813499        | -18,0422772        |
| <b>Met25</b>      | -799,587046 | -799,575184 | -799,624416 | 7,4  | 12,2 | 433,8 | 0,01 | 0,00        | 0,15         | -2,41203447        | 1,30848106        | -2,41218299        |
| <b>Met26</b>      | -799,585659 | -799,573336 | -799,624269 | 12,3 | 12,5 | 448,7 | 0,01 | 0,00        | 0,13         | -2,06698053        | 1,16004036        | -2,06711219        |
| <b>Met27</b>      | -799,585366 | -799,572968 | -799,624136 | 13,3 | 12,9 | 450,8 | 0,01 | 0,00        | 0,11         | -1,79752694        | 1,01347142        | -1,79764197        |
| <b>Met28</b>      | -799,586014 | -799,573722 | -799,624717 | 11,3 | 11,4 | 449,3 | 0,01 | 0,00        | 0,19         | -3,30877802        | 1,85922724        | -3,30898904        |
| <b>Met29</b>      | -799,585009 | -799,572705 | -799,623843 | 13,9 | 13,7 | 450,5 | 0,00 | 0,00        | 0,09         | -1,32141465        | 0,74459593        | -1,32149917        |
|                   |             |             |             |      |      |       |      | <b>1,00</b> | <b>19,51</b> | <b>-799,576601</b> | <b>450,267002</b> | <b>-799,627707</b> |

| Files          | H(0K/hartree)      | H(298/hartree)     | G(298/hartree)     | delta H    | delta G    | S            | xibrut      | xinorm      | Smix         | Hi                 | Si                | Gi                 |
|----------------|--------------------|--------------------|--------------------|------------|------------|--------------|-------------|-------------|--------------|--------------------|-------------------|--------------------|
| <b>G4</b>      |                    |                    |                    |            |            |              |             |             |              |                    |                   |                    |
| <b>MethH+1</b> | -800,567879        | -800,556068        | -800,604883        | 0,0        | 0,0        | 430,1        | 1,00        | 0,34        | 3,05         | -269,867138        | 144,979735        | -269,883593        |
| <b>MethH+2</b> | -800,566743        | -800,554835        | -800,604058        | 3,2        | 2,2        | 433,7        | 0,42        | 0,14        | 2,30         | -113,467133        | 61,4671155        | -113,474109        |
| <b>MethH+3</b> | -800,567633        | -800,555863        | -800,604761        | 0,5        | 0,3        | 430,8        | 0,88        | 0,30        | 3,00         | -237,413916        | 127,761907        | -237,428418        |
| <b>MethH+4</b> | -800,567111        | -800,555304        | -800,604478        | 2,0        | 1,1        | 433,2        | 0,65        | 0,22        | 2,77         | -176,372423        | 95,4488364        | -176,383257        |
| <b>MethH+5</b> | -800,562314        | -800,550291        | -800,600277        | 15,2       | 12,1       | 440,4        | 0,01        | 0,00        | 0,13         | -2,1397764         | 1,17712862        | -2,13991001        |
| <b>MethH+6</b> | -800,561438        | -800,549314        | -800,599799        | 17,7       | 13,3       | 444,8        | 0,00        | 0,00        | 0,09         | -1,29525103        | 0,71965438        | -1,29533271        |
|                |                    |                    |                    |            |            |              |             | <b>1,00</b> | <b>11,34</b> | <b>-800,555638</b> | <b>431,554377</b> | <b>-800,60462</b>  |
| <b>Met-H1</b>  | -799,677266        | -799,665349        | -799,71553         | 0,0        | 0,0        | 442,1        | 1,00        | 0,36        | 3,06         | -284,905106        | 157,516853        | -284,922985        |
| <b>Met-H2</b>  | -799,674066        | -799,662271        | -799,711642        | 8,1        | 10,2       | 435,0        | 0,02        | 0,01        | 0,26         | -4,80172254        | 2,61190957        | -4,80201899        |
| <b>Met-H3</b>  | -799,675951        | -799,663984        | -799,714057        | 3,6        | 3,9        | 441,2        | 0,21        | 0,08        | 1,63         | -60,6554722        | 33,4627649        | -60,6592703        |
| <b>Met-H4</b>  | -799,675606        | -799,663555        | -799,71413         | 4,7        | 3,7        | 445,6        | 0,23        | 0,08        | 1,70         | -65,4884585        | 36,4912814        | -65,4926003        |
| <b>Met-H5</b>  | -799,674668        | -799,662928        | -799,712188        | 6,4        | 8,8        | 434,0        | 0,03        | 0,01        | 0,40         | -8,51973074        | 4,62390681        | -8,52025556        |
| <b>Met-H6</b>  | -799,674884        | -799,662923        | -799,712886        | 6,4        | 6,9        | 440,2        | 0,06        | 0,02        | 0,70         | -17,7329472        | 9,76153747        | -17,7340551        |
| <b>Met-H8</b>  | -799,675932        | -799,664072        | -799,713853        | 3,4        | 4,4        | 438,6        | 0,17        | 0,06        | 1,42         | -48,9583123        | 26,8520984        | -48,9613601        |
| <b>Met-H9</b>  | -799,675391        | -799,663491        | -799,713554        | 4,9        | 5,2        | 441,1        | 0,13        | 0,04        | 1,16         | -35,7646023        | 19,7268963        | -35,7668413        |
| <b>Met-H10</b> | -799,674306        | -799,662215        | -799,712845        | 8,2        | 7,0        | 446,1        | 0,06        | 0,02        | 0,68         | -16,9855884        | 9,47496702        | -16,9866639        |
| <b>Met-H11</b> | -799,67438         | -799,66227         | -799,71306         | 8,1        | 6,5        | 447,5        | 0,07        | 0,03        | 0,80         | -21,2883146        | 11,9126573        | -21,2896668        |
| <b>Met-H12</b> | -799,674739        | -799,66268         | -799,713409        | 7,0        | 5,6        | 446,9        | 0,11        | 0,04        | 1,04         | -30,712773         | 17,1658084        | -30,7147214        |
| <b>Met-H13</b> | -799,676335        | -799,66479         | -799,71315         | 1,5        | 6,2        | 426,1        | 0,08        | 0,03        | 0,86         | -23,3986766        | 12,467098         | -23,4000916        |
| <b>Met-H14</b> | -799,673891        | -799,661876        | -799,712195        | 9,1        | 8,8        | 443,3        | 0,03        | 0,01        | 0,40         | -8,58258218        | 4,75816326        | -8,58312224        |
| <b>Met-H15</b> | -799,674814        | -799,663319        | -799,711469        | 5,3        | 10,7       | 424,2        | 0,01        | 0,01        | 0,22         | -4,00399025        | 2,12411432        | -4,00423134        |
| <b>Met-H16</b> | -799,673688        | -799,66168         | -799,712069        | 9,6        | 9,1        | 443,9        | 0,03        | 0,01        | 0,36         | -7,51882124        | 4,17421652        | -7,51929503        |
| <b>Met-H17</b> | -799,674346        | -799,662385        | -799,712487        | 7,8        | 8,0        | 441,4        | 0,04        | 0,01        | 0,51         | -11,6626783        | 6,43787368        | -11,6634091        |
| <b>Met-H18</b> | -799,673116        | -799,661059        | -799,711449        | 11,3       | 10,7       | 444,0        | 0,01        | 0,00        | 0,22         | -3,92075642        | 2,17672734        | -3,92100348        |
| <b>Met-H19</b> | <b>-799,676231</b> | <b>-799,664439</b> | <b>-799,714612</b> | <b>2,4</b> | <b>2,4</b> | <b>442,0</b> | <b>0,38</b> | <b>0,14</b> | <b>2,25</b>  | <b>-108,643451</b> | <b>60,0567181</b> | <b>-108,650267</b> |
| <b>Met-H20</b> | -799,674033        | -799,662095        | -799,712123        | 8,5        | 8,9        | 440,8        | 0,03        | 0,01        | 0,38         | -7,95754627        | 4,38613063        | -7,95804411        |
| <b>Met-H21</b> | -799,675446        | -799,663967        | -799,7124          | 3,6        | 8,2        | 426,7        | 0,04        | 0,01        | 0,48         | -10,6443415        | 5,68000086        | -10,6449862        |
| <b>Met-H22</b> | -799,673903        | -799,661855        | -799,712344        | 9,2        | 8,4        | 444,8        | 0,04        | 0,01        | 0,46         | -10,036361         | 5,58293305        | -10,0369946        |
| <b>Met-H23</b> | -799,672745        | -799,660777        | -799,711235        | 12,0       | 11,3       | 444,6        | 0,01        | 0,00        | 0,18         | -3,13159183        | 1,74094539        | -3,13178943        |
| <b>Met-H24</b> | -799,673314        | -799,661406        | -799,711548        | 10,4       | 10,5       | 441,8        | 0,02        | 0,01        | 0,24         | -4,35034361        | 2,4033379         | -4,3506164         |
| <b>Met-H7</b>  | <b>-799,676232</b> | <b>-799,66444</b>  | <b>-799,714608</b> | <b>2,4</b> | <b>2,4</b> |              |             | <b>1,00</b> | <b>19,41</b> | <b>-799,664168</b> | <b>441,588939</b> | <b>-799,714289</b> |

|                   |             |             |             |      |       |      |             |              |                    |                   |                    |
|-------------------|-------------|-------------|-------------|------|-------|------|-------------|--------------|--------------------|-------------------|--------------------|
| <b>Met1</b>       | -800,213231 | -800,200912 | -800,251943 | 0,0  | 449,6 | 1,00 | 0,39        | 3,05         | -311,566463        | 175,057814        | -311,586333        |
| <b>Met2</b>       | -800,211875 | -800,199444 | -800,250697 | 3,9  | 451,6 | 0,27 | 0,11        | 1,97         | -84,188779         | 47,5084668        | -84,1941713        |
| <b>MetIlg+g+a</b> | -800,211756 | -800,199414 | -800,25046  | 3,9  | 449,7 | 0,21 | 0,08        | 1,71         | -65,6386178        | 36,8908509        | -65,642805         |
| <b>Met3</b>       | -800,211611 | -800,199217 | -800,250329 | 4,5  | 450,3 | 0,18 | 0,07        | 1,57         | -57,2019371        | 32,1907613        | -57,2055908        |
| <b>Met4</b>       | -800,211192 | -800,198708 | -800,250204 | 5,8  | 453,7 | 0,16 | 0,06        | 1,44         | -50,1647268        | 28,4426371        | -50,1679551        |
| <b>MetIlg+ag-</b> | -800,20994  | -800,197839 | -800,24823  | 8,1  | 444,0 | 0,02 | 0,01        | 0,32         | -6,31050838        | 3,50119024        | -6,31090577        |
| <b>Met5</b>       | -800,211486 | -800,199158 | -800,249964 | 4,6  | 447,6 | 0,13 | 0,05        | 1,22         | -38,9884204        | 21,8096307        | -38,9908958        |
| <b>Met6</b>       | -800,209587 | -800,19717  | -800,249255 | 9,8  | 458,9 | 0,06 | 0,02        | 0,72         | -18,5166514        | 10,6187615        | -18,5178567        |
| <b>Met7</b>       | -800,209329 | -800,196792 | -800,249362 | 10,8 | 463,2 | 0,07 | 0,03        | 0,79         | -20,7187965        | 11,9922716        | -20,7201577        |
| <b>Met8</b>       | -800,210188 | -800,1983   | -800,247941 | 6,9  | 437,4 | 0,01 | 0,01        | 0,25         | -4,65857225        | 2,546194          | -4,65886125        |
| <b>Met9</b>       | -800,210995 | -800,199218 | -800,248626 | 4,4  | 435,3 | 0,03 | 0,01        | 0,44         | -9,56487145        | 5,20324227        | -9,56546203        |
| <b>Met10</b>      | -800,210962 | -800,199148 | -800,248554 | 4,6  | 435,3 | 0,03 | 0,01        | 0,41         | -8,86829606        | 4,82411388        | -8,86884361        |
| <b>Met11</b>      | -800,211182 | -800,199473 | -800,248445 | 3,8  | 431,5 | 0,03 | 0,01        | 0,38         | -7,90907854        | 4,26453052        | -7,90956258        |
| <b>Met12</b>      | -800,209227 | -800,197241 | -800,247726 | 9,6  | 444,8 | 0,01 | 0,00        | 0,21         | -3,71699183        | 2,06610637        | -3,71722634        |
| <b>Met13</b>      | -800,209053 | -800,196564 | -800,248924 | 11,4 | 461,3 | 0,04 | 0,02        | 0,56         | -13,0795958        | 7,54037663        | -13,0804517        |
| <b>Met14</b>      | -800,208779 | -800,196284 | -800,248286 | 12,2 | 458,2 | 0,02 | 0,01        | 0,33         | -6,69275432        | 3,83198816        | -6,69318926        |
| <b>Met15</b>      | -800,20875  | -800,196728 | -800,246963 | 11,0 | 442,6 | 0,01 | 0,00        | 0,11         | -1,6679769         | 0,92256171        | -1,66808161        |
| <b>Met16</b>      | -800,209813 | -800,19791  | -800,247709 | 7,9  | 438,7 | 0,01 | 0,00        | 0,20         | -3,65122281        | 2,0019688         | -3,65145004        |
| <b>Met17</b>      | -800,208421 | -800,19623  | -800,246963 | 12,3 | 447,0 | 0,01 | 0,00        | 0,11         | -1,66797586        | 0,93170744        | -1,66808161        |
| <b>Met18</b>      | -800,210289 | -800,197975 | -800,248871 | 7,7  | 448,4 | 0,04 | 0,02        | 0,54         | -12,3714897        | 6,93272481        | -12,3722766        |
| <b>Met19</b>      | -800,208082 | -800,195983 | -800,246483 | 12,9 | 444,9 | 0,00 | 0,00        | 0,07         | -1,00754283        | 0,56021442        | -1,00760641        |
| <b>Met20</b>      | -800,208767 | -800,196323 | -800,24835  | 12,0 | 458,4 | 0,02 | 0,01        | 0,35         | -7,15805536        | 4,10036997        | -7,15852076        |
| <b>Met21</b>      | -800,209802 | -800,197438 | -800,248539 | 9,1  | 450,2 | 0,03 | 0,01        | 0,41         | -8,72966975        | 4,91163194        | -8,73022723        |
| <b>Met22</b>      | -800,20995  | -800,197618 | -800,248493 | 8,6  | 448,2 | 0,03 | 0,01        | 0,39         | -8,31797274        | 4,65929726        | -8,31850158        |
| <b>Met23</b>      | -800,209698 | -800,197881 | -800,247355 | 8,0  | 435,9 | 0,01 | 0,00        | 0,15         | -2,51756281        | 1,37137333        | -2,51771846        |
| <b>Met24</b>      | -800,209828 | -800,197491 | -800,249209 | 9,0  | 455,7 | 0,06 | 0,02        | 0,70         | -17,643397         | 10,0466784        | -17,6445373        |
| <b>MetIlg+g+a</b> | -800,210781 | -800,198771 | -800,249144 | 5,6  | 443,8 | 0,05 | 0,02        | 0,66         | -16,4792202        | 9,13970865        | -16,4802576        |
| <b>Met25</b>      | -800,210086 | -800,198223 | -800,247456 | 7,1  | 433,8 | 0,01 | 0,00        | 0,16         | -2,7992791         | 1,51740209        | -2,79945133        |
| <b>Met26</b>      | -800,208568 | -800,196245 | -800,247178 | 12,3 | 448,7 | 0,01 | 0,00        | 0,13         | -2,09050121        | 1,17232744        | -2,09063427        |
| <b>Met27</b>      | -800,208254 | -800,195856 | -800,247024 | 13,3 | 450,8 | 0,01 | 0,00        | 0,11         | -1,77832616        | 1,00186527        | -1,77843987        |
| <b>Met28</b>      | -800,208892 | -800,1966   | -800,247595 | 11,3 | 449,3 | 0,01 | 0,00        | 0,19         | -3,23923662        | 1,81873459        | -3,23944305        |
| <b>Met29</b>      | -800,207889 | -800,195585 | -800,246722 | 14,0 | 450,5 | 0,00 | 0,00        | 0,09         | -1,29500146        | 0,72913024        | -1,29508422        |
|                   |             |             |             |      |       |      | <b>1,00</b> | <b>19,75</b> | <b>-800,199491</b> | <b>450,106632</b> | <b>-800,250579</b> |

Table T5. Signed deviation (method-G4) on the computed GB and PA of the studied amino acids.

| M          | Method                  | GB(M) <sup>a</sup><br>kJ mol <sup>-1</sup> |         | PA(M) <sup>a</sup><br>kJ mol <sup>-1</sup> |         |
|------------|-------------------------|--------------------------------------------|---------|--------------------------------------------|---------|
|            |                         | msc                                        | average | msc                                        | average |
| Serine     | B97-D/6-31+G(d,p)       | 8.9                                        | 9.5     | 6.3                                        | 6.6     |
|            | B97-D/6-311++G(3df,2p)  | 7.8                                        |         | 5.1                                        |         |
|            | B3LYP/6-31+G(d,p)       | -0.7                                       | 0.4     | 0.3                                        | -0.6    |
|            | B3LYP/6-311++G(3df,2p)  | -1.7                                       |         | -0.8                                       |         |
|            | M06-2X/6-31+G(d,p)      | -6.3                                       | -5.7    | -6.3                                       | -6.9    |
|            | M06-2X/6-311++G(3df,2p) | -10.3                                      |         | -11                                        |         |
|            | CBS-QB3                 | -1.7                                       | -2.2    | -2.4                                       | -2.3    |
|            | G3B3                    | 0.2                                        | 0.0     | -0.3                                       | -0.1    |
|            | G4MP2                   | 0.1                                        | 0.3     | 0.4                                        | 0.2     |
|            | G4                      | 0.0                                        | 0.0     | 0.0                                        | 0.0     |
| Threonine  | B97-D/6-31+G(d,p)       | 9.2                                        | 10.2    | 7.0                                        | 7.3     |
|            | B97-D/6-311++G(3df,2p)  | 8.3                                        |         | 6.5                                        |         |
|            | B3LYP/6-31+G(d,p)       | 1.3                                        | 2.0     | 1.5                                        | 1.0     |
|            | B3LYP/6-311++G(3df,2p)  | -0.3                                       |         | -0.1                                       |         |
|            | M06-2X/6-31+G(d,p)      | -5.2                                       | -5.3    | -6.7                                       | -6.6    |
|            | M06-2X/6-311++G(3df,2p) | -8.7                                       |         | -10.1                                      |         |
|            | CBS-QB3                 | -3.0                                       | -2.2    | -2.9                                       | -3.3    |
|            | G3B3                    | 0.3                                        | 0.2     | -0.5                                       | -0.1    |
|            | G4MP2                   | 0.4                                        | 0.2     | 0.4                                        | 0.6     |
|            | G4                      | 0.0                                        | 0.0     | 0.0                                        | 0.0     |
| Cysteine   | B97-D/6-31+G(d,p)       | 11.0                                       | 12.5    | 9.7                                        | 9.2     |
|            | B97-D/6-311++G(3df,2p)  | 12.0                                       |         | 10.7                                       |         |
|            | B3LYP/6-31+G(d,p)       | -0.6                                       | -0.2    | -0.3                                       | 0.6     |
|            | B3LYP/6-311++G(3df,2p)  | 0.5                                        |         | 0.7                                        |         |
|            | M06-2X/6-31+G(d,p)      | -9.5                                       | -9.1    | -9.7                                       | -9.7    |
|            | M06-2X/6-311++G(3df,2p) | -10.3                                      |         | -10.6                                      |         |
|            | CBS-QB3                 | -1.9                                       | -2.1    | -1.8                                       | -1.8    |
|            | G3B3                    | 0.1                                        | -0.2    | -0.4                                       | -0.4    |
|            | G4MP2                   | 0.8                                        | 0.5     | 0.8                                        | 1.0     |
|            | G4                      | 0.0                                        | 0.0     | 0.0                                        | 0.0     |
| Methionine | B97-D/6-31+G(d,p)       | 23.1                                       | 20.1    | 19.1                                       | 20.3    |
|            | B97-D/6-311++G(3df,2p)  | 22.8                                       |         | 19.2                                       |         |
|            | B3LYP/6-31+G(d,p)       | 5.0                                        | 2.7     | 4.1                                        | 4.2     |
|            | B3LYP/6-311++G(3df,2p)  | 4.5                                        |         | 3.6                                        |         |
|            | M06-2X/6-31+G(d,p)      | -4.4                                       | -6.4    | -7.7                                       | -6.7    |
|            | M06-2X/6-311++G(3df,2p) | -6.1                                       |         | -9.5                                       |         |
|            | CBS-QB3                 | -1.8                                       | -1.7    | -2.2                                       | -2.0    |
|            | G3B3                    | 1.0                                        | 1.2     | 0.4                                        | 0.7     |
|            | G4MP2                   | 0.1                                        | -0.1    | 0.1                                        | 0.0     |
|            | G4                      | 0.0                                        | 0.0     | 0.0                                        | 0.0     |

a) "most stable conformer" (msc) value followed by the averaged values calculated over the 298 K distribution of conformers (including the entropy of mixing).

Table T6. Signed deviation (method-G4) on the computed deprotonation thermochemistry of the studied  $\alpha$ -aminoacids.

| M          | Method                  | $\Delta_{\text{acid}}G(M)^a$<br>kJ mol <sup>-1</sup> |         | $\Delta_{\text{acid}}H(M)^a$<br>kJ mol <sup>-1</sup> |         |
|------------|-------------------------|------------------------------------------------------|---------|------------------------------------------------------|---------|
|            |                         | msc                                                  | average | msc                                                  | average |
| Serine     | B97-D/6-31+G(d,p)       | -1.4                                                 | -0.9    | 0.2                                                  | 1.0     |
|            | B97-D/6-311++G(3df,2p)  | 4.5                                                  |         | 6.3                                                  |         |
|            | B3LYP/6-31+G(d,p)       | -9.5                                                 | -10.0   | -10.1                                                | -9.5    |
|            | B3LYP/6-311++G(3df,2p)  | -4.9                                                 |         | -5.5                                                 |         |
|            | M06-2X/6-31+G(d,p)      | -6.2                                                 | -6.0    | -5.3                                                 | -5.1    |
|            | M06-2X/6-311++G(3df,2p) | -3.3                                                 |         | -1.9                                                 |         |
|            | CBS-QB3                 | -5.3                                                 | -4.7    | -4.3                                                 | -4.8    |
|            | G3B3                    | -1.4                                                 | -1.1    | -0.6                                                 | -1.3    |
|            | G4MP2                   | 2.2                                                  | 2.0     | 1.9                                                  | 2.0     |
|            | G4                      | 0.0                                                  | 0.0     | 0.0                                                  | 0.0     |
| Threonine  | B97-D/6-31+G(d,p)       | 2.8                                                  | 2.8     | 3.3                                                  | 3.1     |
|            | B97-D/6-311++G(3df,2p)  | 8.4                                                  |         | 8.9                                                  |         |
|            | B3LYP/6-31+G(d,p)       | -7.4                                                 | -7.6    | -7.1                                                 | -6.4    |
|            | B3LYP/6-311++G(3df,2p)  | -3.6                                                 |         | -3.4                                                 |         |
|            | M06-2X/6-31+G(d,p)      | -5.5                                                 | -6.0    | -3.9                                                 | -4.5    |
|            | M06-2X/6-311++G(3df,2p) | -2.8                                                 |         | -1.2                                                 |         |
|            | CBS-QB3                 | -4.6                                                 | -4.8    | -4.2                                                 | -4.6    |
|            | G3B3                    | -1.7                                                 | -0.9    | -0.8                                                 | -2.0    |
|            | G4MP2                   | 1.9                                                  | 2.1     | 1.9                                                  | 1.8     |
|            | G4                      | 0.0                                                  | 0.0     | 0.0                                                  | 0.0     |
| Cysteine   | B97-D/6-31+G(d,p)       | 0.4                                                  | -1.8    | 0.0                                                  | 1.9     |
|            | B97-D/6-311++G(3df,2p)  | 8.1                                                  |         | 7.7                                                  |         |
|            | B3LYP/6-31+G(d,p)       | -10.5                                                | -10.7   | -10.0                                                | -9.1    |
|            | B3LYP/6-311++G(3df,2p)  | -2.2                                                 |         | -1.6                                                 |         |
|            | M06-2X/6-31+G(d,p)      | -16.3                                                | -17.0   | -15.1                                                | -15.3   |
|            | M06-2X/6-311++G(3df,2p) | -9.1                                                 |         | -7.9                                                 |         |
|            | CBS-QB3                 | -3.2                                                 | -4.1    | -3.1                                                 | -2.8    |
|            | G3B3                    | -1.8                                                 | -2.1    | -1.4                                                 | -1.6    |
|            | G4MP2                   | 1.7                                                  | 1.9     | 1.7                                                  | 1.7     |
|            | G4                      | 0.0                                                  | 0.0     | 0.0                                                  | 0.0     |
| Methionine | B97-D/6-31+G(d,p)       | -2.8                                                 | -1.7    | -0.5                                                 | -0.5    |
|            | B97-D/6-311++G(3df,2p)  | 1.5                                                  |         | 4.1                                                  |         |
|            | B3LYP/6-31+G(d,p)       | -10.2                                                | -9.8    | -7.2                                                 | -8.1    |
|            | B3LYP/6-311++G(3df,2p)  | -7.9                                                 |         | -4.9                                                 |         |
|            | M06-2X/6-31+G(d,p)      | -7.3                                                 | -7.3    | -6.8                                                 | -5.7    |
|            | M06-2X/6-311++G(3df,2p) | -4.5                                                 |         | -3.8                                                 |         |
|            | CBS-QB3                 | -4.3                                                 | -4.2    | -3.5                                                 | -4.2    |
|            | G3B3                    | -0.8                                                 | -0.5    | -0.4                                                 | -0.8    |
|            | G4MP2                   | 1.7                                                  | 2.2     | 1.8                                                  | 1.6     |
|            | G4                      | 0.0                                                  | 0.0     | 0.0                                                  | 0.0     |

a) "most stable conformer" (msc) value followed by the averaged values calculated over the 298 K distribution of conformer.

Table T7. Signed deviation (method-experiment) on the computed protonation thermochemistry of the studied amino acids.

| M          | Method                  | GB(M) <sup>a</sup><br>kJ mol <sup>-1</sup> |         | PA(M) <sup>a</sup><br>kJ mol <sup>-1</sup> |         |
|------------|-------------------------|--------------------------------------------|---------|--------------------------------------------|---------|
|            |                         | msc                                        | average | msc                                        | average |
| Serine     | B97-D/6-31+G(d,p)       | 10.5                                       | 9.8     | 7.4                                        | 8.6     |
|            | B97-D/6-311++G(3df,2p)  | 9.4                                        |         | 6.2                                        |         |
|            | B3LYP/6-31+G(d,p)       | 0.9                                        | 0.7     | 1.4                                        | 1.4     |
|            | B3LYP/6-311++G(3df,2p)  | -0.1                                       |         | 0.3                                        |         |
|            | M06-2X/6-31+G(d,p)      | -4.7                                       | -5.4    | -5.2                                       | -4.9    |
|            | M06-2X/6-311++G(3df,2p) | -8.7                                       |         | -9.9                                       |         |
|            | CBS-QB3                 | -0.1                                       | -1.9    | -1.3                                       | -0.3    |
|            | G3B3                    | 1.8                                        | 0.3     | 0.8                                        | 1.9     |
|            | G4MP2                   | 1.7                                        | 0.6     | 1.5                                        | 2.2     |
|            | G4                      | 1.6                                        | 0.3     | 1.1                                        | 2.0     |
| Threonine  | B97-D/6-31+G(d,p)       | 7.6                                        | 7.4     | 4.6                                        | 6.2     |
|            | B97-D/6-311++G(3df,2p)  | 6.7                                        |         | 4.1                                        |         |
|            | B3LYP/6-31+G(d,p)       | -0.3                                       | -0.8    | -0.9                                       | -0.1    |
|            | B3LYP/6-311++G(3df,2p)  | -1.9                                       |         | -2.5                                       |         |
|            | M06-2X/6-31+G(d,p)      | -6.8                                       | -8.1    | -9.1                                       | -7.7    |
|            | M06-2X/6-311++G(3df,2p) | -10.3                                      |         | -12.5                                      |         |
|            | CBS-QB3                 | -4.6                                       | -5.0    | -5.3                                       | -4.4    |
|            | G3B3                    | -1.3                                       | -2.6    | -2.9                                       | -1.2    |
|            | G4MP2                   | -1.2                                       | -2.6    | -2.0                                       | -0.5    |
|            | G4                      | -1.6                                       | -2.8    | -2.4                                       | -1.1    |
| Cysteine   | B97-D/6-31+G(d,p)       | 14.3                                       | 14.6    | 10.3                                       | 12.3    |
|            | B97-D/6-311++G(3df,2p)  | 15.3                                       |         | 11.3                                       |         |
|            | B3LYP/6-31+G(d,p)       | 2.7                                        | 1.9     | 0.3                                        | 3.7     |
|            | B3LYP/6-311++G(3df,2p)  | 3.8                                        |         | 1.3                                        |         |
|            | M06-2X/6-31+G(d,p)      | -6.2                                       | -7.0    | -9.1                                       | -6.6    |
|            | M06-2X/6-311++G(3df,2p) | -7.0                                       |         | -10.0                                      |         |
|            | CBS-QB3                 | 1.4                                        | 0.0     | -1.2                                       | 1.3     |
|            | G3B3                    | 3.4                                        | 1.9     | 0.2                                        | 2.7     |
|            | G4MP2                   | 4.1                                        | 2.6     | 1.4                                        | 4.1     |
|            | G4                      | 3.3                                        | 2.1     | 0.6                                        | 3.1     |
| Methionine | B97-D/6-31+G(d,p)       | 23.8                                       | 14.6    | 20.3                                       | 22.5    |
|            | B97-D/6-311++G(3df,2p)  | 23.5                                       |         | 20.4                                       |         |
|            | B3LYP/6-31+G(d,p)       | 5.7                                        | 1.9     | 5.3                                        | 6.4     |
|            | B3LYP/6-311++G(3df,2p)  | 5.2                                        |         | 4.8                                        |         |
|            | M06-2X/6-31+G(d,p)      | -3.7                                       | -7.0    | -6.5                                       | -4.5    |
|            | M06-2X/6-311++G(3df,2p) | -5.4                                       |         | -8.3                                       |         |
|            | CBS-QB3                 | -1.1                                       | 0.0     | -1.0                                       | 0.2     |
|            | G3B3                    | 1.7                                        | 1.9     | 1.6                                        | 2.9     |
|            | G4MP2                   | 0.8                                        | 2.6     | 1.3                                        | 2.2     |
|            | G4                      | 0.7                                        | 2.1     | 1.2                                        | 2.2     |

a) "most stable conformer" (msc) value followed by the averaged values calculated over the 298 K distribution of conformers.



Table T8. Signed deviation (method-experiment) on the computed deprotonation thermochemistry of the studied  $\alpha$ -aminoacids.

| M          | Method                  | $\Delta_{\text{acid}}G$ (M) <sup>a</sup><br>kJ mol <sup>-1</sup> |         | $\Delta_{\text{acid}}H$ (M) <sup>a</sup><br>kJ mol <sup>-1</sup> |         |
|------------|-------------------------|------------------------------------------------------------------|---------|------------------------------------------------------------------|---------|
|            |                         | msc                                                              | average | msc                                                              | average |
| Serine     | B97-D/6-31+G(d,p)       | -3.1                                                             | -2.0    | -1.8                                                             | -2.4    |
|            | B97-D/6-311++G(3df,2p)  | 2.8                                                              |         | 4.3                                                              |         |
|            | B3LYP/6-31+G(d,p)       | -11.2                                                            | -11.1   | -12.1                                                            | -12.9   |
|            | B3LYP/6-311++G(3df,2p)  | -6.6                                                             |         | -7.5                                                             |         |
|            | M06-2X/6-31+G(d,p)      | -7.9                                                             | -7.1    | -7.3                                                             | -8.5    |
|            | M06-2X/6-311++G(3df,2p) | -5.0                                                             |         | -3.9                                                             |         |
|            | CBS-QB3                 | -7.0                                                             | -5.8    | -6.3                                                             | -8.2    |
|            | G3B3                    | -3.1                                                             | -2.2    | -2.6                                                             | -4.7    |
|            | G4MP2                   | 0.5                                                              | 0.9     | -0.1                                                             | -1.4    |
|            | G4                      | -1.7                                                             | -1.1    | -2.0                                                             | -3.4    |
| Threonine  | B97-D/6-31+G(d,p)       | 1.3                                                              | 2.5     | 2.7                                                              | 1.8     |
|            | B97-D/6-311++G(3df,2p)  | 6.9                                                              |         | 8.3                                                              |         |
|            | B3LYP/6-31+G(d,p)       | -8.9                                                             | -7.9    | -7.7                                                             | -7.7    |
|            | B3LYP/6-311++G(3df,2p)  | -5.1                                                             |         | -4.0                                                             |         |
|            | M06-2X/6-31+G(d,p)      | -7.0                                                             | -6.3    | -4.5                                                             | -5.8    |
|            | M06-2X/6-311++G(3df,2p) | -4.3                                                             |         | -1.8                                                             |         |
|            | CBS-QB3                 | -6.1                                                             | -5.1    | -4.8                                                             | -5.9    |
|            | G3B3                    | -3.2                                                             | -1.2    | -1.4                                                             | -3.3    |
|            | G4MP2                   | 0.4                                                              | 1.8     | 1.3                                                              | 0.5     |
|            | G4                      | -1.5                                                             | -0.3    | -0.6                                                             | -1.3    |
| Cysteine   | B97-D/6-31+G(d,p)       | -1.7                                                             | -2.4    | -2.0                                                             | -3.3    |
|            | B97-D/6-311++G(3df,2p)  | 6.0                                                              |         | 5.7                                                              |         |
|            | B3LYP/6-31+G(d,p)       | -12.6                                                            | -11.3   | -12.0                                                            | -14.3   |
|            | B3LYP/6-311++G(3df,2p)  | -4.3                                                             |         | -3.6                                                             |         |
|            | M06-2X/6-31+G(d,p)      | -18.4                                                            | -17.6   | -17.1                                                            | -20.5   |
|            | M06-2X/6-311++G(3df,2p) | -11.2                                                            |         | -9.9                                                             |         |
|            | CBS-QB3                 | -5.3                                                             | -4.7    | -5.1                                                             | -8.0    |
|            | G3B3                    | -3.9                                                             | -2.7    | -3.4                                                             | -6.8    |
|            | G4MP2                   | -0.4                                                             | 1.3     | -0.3                                                             | -3.5    |
|            | G4                      | -2.1                                                             | -0.6    | -2.0                                                             | -5.2    |
| Methionine | B97-D/6-31+G(d,p)       | -1.4                                                             | -0.8    | 1.7                                                              | 1.7     |
|            | B97-D/6-311++G(3df,2p)  | 2.9                                                              |         | 6.3                                                              |         |
|            | B3LYP/6-31+G(d,p)       | -8.8                                                             | -8.9    | -5.0                                                             | -5.9    |
|            | B3LYP/6-311++G(3df,2p)  | -6.5                                                             |         | -2.7                                                             |         |
|            | M06-2X/6-31+G(d,p)      | -5.9                                                             | -6.4    | -4.6                                                             | -3.5    |
|            | M06-2X/6-311++G(3df,2p) | -3.1                                                             |         | -1.6                                                             |         |
|            | CBS-QB3                 | -2.9                                                             | -3.3    | -1.3                                                             | -2.0    |
|            | G3B3                    | 0.6                                                              | 0.4     | 1.8                                                              | 1.4     |
|            | G4MP2                   | 3.1                                                              | 3.1     | 4.0                                                              | 3.8     |
|            | G4                      | 1.4                                                              | 0.9     | 2.2                                                              | 2.2     |

a) "most stable conformer" (msc) value followed by the averaged values calculated over the 298 K distribution of conformers.

Table T9. Computed thermochemical data of reference compounds ammonia and benzoic acid.

| M               | Method                       | GB(M)<br>kJ mol <sup>-1</sup>                      |           | PA (M)<br>kJ mol <sup>-1</sup>                      |           |
|-----------------|------------------------------|----------------------------------------------------|-----------|-----------------------------------------------------|-----------|
|                 |                              | msc                                                | deviation | msc                                                 | deviation |
| NH <sub>3</sub> | B97-D/6-31+G(d,p)            | 831.6                                              | 12.6      | 866.1                                               | 12.5      |
|                 | B97-D/6-311++G(3df,2p)       | 824.7                                              | 5.7       | 859.2                                               | 5.6       |
|                 | B3LYP/6-31+G(d,p)            | 821.9                                              | 2.9       | 856.4                                               | 2.8       |
|                 | B3LYP/6-311++G(3df,2p)       | 814.3                                              | -4.7      | 848.8                                               | -4.8      |
|                 | M06-2X/6-31+G(d,p)           | 819.0                                              | 0.0       | 853.4                                               | -0.2      |
|                 | M06-2X/6-311++G(3df,2p)      | 808.7                                              | -10.3     | 843.2                                               | -10.4     |
|                 | CBS-QB3                      | 819.8                                              | 0.8       | 854.3                                               | 0.7       |
|                 | G3B3                         | 821.3                                              | 2.3       | 855.7                                               | 2.1       |
|                 | G4MP2                        | 819.9                                              | 0.9       | 854.3                                               | 0.7       |
|                 | G4                           | 820.6                                              | 1.6       | 855.1                                               | 1.5       |
|                 | <b>Tabulated<sup>a</sup></b> | <b>819.0</b>                                       |           | <b>853.6</b>                                        |           |
| M               | Method                       | $\Delta_{\text{acid}}G(M)$<br>kJ mol <sup>-1</sup> |           | $\Delta_{\text{acid}}H (M)$<br>kJ mol <sup>-1</sup> |           |
|                 |                              | msc                                                | deviation | msc                                                 | deviation |
| Benzoic<br>acid | B97-D/6-31+G(d,p)            | 1393.3                                             | -0.7      | 1424.1                                              | 0.6       |
|                 | B97-D/6-311++G(3df,2p)       | 1396.5                                             | 2.5       | 1427.3                                              | 3.8       |
|                 | B3LYP/6-31+G(d,p)            | 1387.5                                             | -6.5      | 1417.8                                              | -5.7      |
|                 | B3LYP/6-311++G(3df,2p)       | 1390.5                                             | -3.5      | 1420.8                                              | -2.7      |
|                 | M06-2X/6-31+G(d,p)           | 1388.2                                             | -5.8      | 1418.7                                              | -4.8      |
|                 | M06-2X/6-311++G(3df,2p)      | 1389.0                                             | -5.0      | 1419.5                                              | -4.0      |
|                 | CBS-QB3                      | 1390.1                                             | -3.9      | 1420.1                                              | -3.4      |
|                 | G3B3                         | 1393.6                                             | -0.4      | 1423.6                                              | 0.1       |
|                 | G4MP2                        | 1393.3                                             | -0.6      | 1423.3                                              | -0.2      |
|                 | G4                           | 1392.5                                             | -1.5      | 1422.4                                              | -1.1      |
|                 | <b>Tabulated<sup>b</sup></b> | <b>1394.0</b>                                      |           | <b>1423.5</b>                                       |           |

a) from ref 47. b) from ref 56.

Table T10. Correspondence between conformers name in excels tables and charts.

|       |                                 |        |                                |
|-------|---------------------------------|--------|--------------------------------|
| SER1  | SI <sub>Cg</sub> <sup>+</sup>   | SERH+1 | SHI <sub>g</sub> <sup>-</sup>  |
| SER2  | SII <sub>Bg</sub> <sup>-</sup>  | SERH+2 | SHI <sub>g</sub> <sup>+</sup>  |
| SER3  | SII <sub>Ba</sub>               | SERH+3 | SHII <sub>g</sub> <sup>-</sup> |
| SER4  | SI <sub>Ag</sub> <sup>-</sup>   | SERH+4 | SHII <sub>g</sub> <sup>+</sup> |
| SER5  | SIII <sub>Cg</sub> <sup>-</sup> | SER-H1 | S-H <sub>Ba</sub>              |
| SER6  | SIII <sub>Cg</sub> <sup>+</sup> | SER-H2 | S-H <sub>Aa</sub>              |
| SER7  | SII <sub>Ag</sub> <sup>+</sup>  | SER-H4 | S-H <sub>Bg</sub> <sup>-</sup> |
| SER11 | SI' <sub>Cg</sub> <sup>-</sup>  | SER-H5 | S-H <sub>Ag</sub> <sup>+</sup> |

|       |                                    |        |                                |
|-------|------------------------------------|--------|--------------------------------|
| THR1  | TII <sub>Bg</sub> <sup>-</sup>     | THRH+1 | THI <sub>g</sub> <sup>-</sup>  |
| THR2  | TI <sub>Cg</sub> <sup>+</sup>      | THRH+2 | THI <sub>g</sub> <sup>+</sup>  |
| THR3  | TIII <sub>Cg</sub> <sup>+</sup>    | THRH+3 | THII <sub>g</sub> <sup>+</sup> |
| THR4  | TI <sub>Ag</sub> <sup>-</sup>      | THRH+4 | THII <sub>g</sub> <sup>-</sup> |
| THR5  | TII <sub>Ba</sub>                  | THR-H1 | T-H <sub>Aa</sub>              |
| THR6  | TIII <sub>Cg</sub> <sup>-</sup>    | THR-H2 | T-H <sub>Ba</sub>              |
| THR7  | TI' <sub>Cg</sub> <sup>-</sup> (2) | THR-H3 | T-H <sub>Bg</sub> <sup>-</sup> |
| THR8  | TII <sub>Ag</sub> <sup>+</sup>     | THR-H4 | T-H <sub>Ag</sub> <sup>+</sup> |
| THR9  | TI' <sub>Cg</sub> <sup>-</sup>     |        |                                |
| THR10 | TII' <sub>Ag</sub> <sup>+</sup>    |        |                                |

|       |                                 |        |                                 |
|-------|---------------------------------|--------|---------------------------------|
| CYS1  | CII <sub>Bg</sub> <sup>-</sup>  | CYSH+1 | CHI <sub>g</sub> <sup>-</sup>   |
| CYS2  | CI <sub>Cg</sub> <sup>+</sup>   | CYSH+2 | CHI <sub>g</sub> <sup>+</sup>   |
| CYS4  | CI' <sub>Cg</sub> <sup>-</sup>  | CYSH+3 | CHI' <sub>g</sub> <sup>+</sup>  |
| CYS5  | CI <sub>Cg</sub> <sup>-</sup>   | CYSH+4 | CHI' <sub>g</sub> <sup>-</sup>  |
| CYS6  | CII <sub>Ag</sub> <sup>+</sup>  | CYSH+5 | CHII <sub>g</sub> <sup>-</sup>  |
| CYS9  | CIII <sub>Cg</sub> <sup>-</sup> | CYSH+6 | CHII <sub>g</sub> <sup>+</sup>  |
| CYS10 | CI <sub>Ag</sub> <sup>-</sup>   | CYS-H1 | C-H <sub>Sca</sub>              |
| CYS11 | CIII <sub>Ca</sub>              | CYS-H2 | C-H <sub>Scg</sub> <sup>-</sup> |
|       |                                 | CYS-H3 | C-H <sub>Saa</sub>              |
|       |                                 | CYS-H6 | C-H <sub>Ocg</sub> <sup>+</sup> |
|       |                                 | CYS-H7 | C-H <sub>Sbg</sub> <sup>-</sup> |

|                                   |                                      |         |                                      |
|-----------------------------------|--------------------------------------|---------|--------------------------------------|
| Met1                              | MetI <sub>Cg</sub> <sup>+g+g+</sup>  | MetH+4  | MetHI <sub>g</sub> <sup>-g+a</sup>   |
| Met2                              | MetI <sub>Cg</sub> <sup>+ag-</sup>   | MetH+5  | MetHII <sub>g</sub> <sup>+g-g-</sup> |
| Met3                              | MetI <sub>Cg</sub> <sup>+ag+</sup>   | MetH+6  | MetHII <sub>g</sub> <sup>+g-a</sup>  |
| Met4                              | MetI <sub>Cg</sub> <sup>+aa</sup>    | Met-H1  | Met-H <sub>Ag</sub> <sup>-ag+</sup>  |
| Met5                              | MetI <sub>Cg</sub> <sup>+g+g-</sup>  | Met-H3  | Met-H <sub>Ag</sub> <sup>+ag-</sup>  |
| Met9                              | MetII <sub>Bg</sub> <sup>-g+a</sup>  | Met-H4  | Met-H <sub>Ag</sub> <sup>+ag+</sup>  |
| Met10                             | MetII <sub>Ag</sub> <sup>+g-g-</sup> | Met-H8  | Met-H <sub>Ag</sub> <sup>-ag-</sup>  |
| Met11                             | MetII <sub>Bg</sub> <sup>-g+g+</sup> | Met-H9  | Met-H <sub>Ag</sub> <sup>-aa</sup>   |
| MetI <sub>g</sub> <sup>+g+a</sup> | MetI <sub>Cg</sub> <sup>+g+a</sup>   | Met-H13 | Met-H <sub>Ag</sub> <sup>-g+</sup>   |
| MetH+1                            | MetHI <sub>g</sub> <sup>+g-g-</sup>  | Met-H19 | Met-H <sub>Bg</sub> <sup>-ag+</sup>  |
| MetH+2                            | MetHI <sub>g</sub> <sup>+g-a</sup>   | Met-H21 | Met-H <sub>Bag</sub> <sup>-g+</sup>  |
| MetH+3                            | MetHI <sub>g</sub> <sup>-g+g+</sup>  |         |                                      |
